# Supplementary material for: Enteral Feeding Interventions in the Prevention of Necrotizing Enterocolitis: A Systematic Review of Experimental and Clinical Studies
Source: MDPI journal article supplement (doi:10.3390/nu13051726), 2021-05-19
Supplement: s1 [file s1]

## Index supplementary files

|                                                                                                                                                                                                                                                   |         |
|---------------------------------------------------------------------------------------------------------------------------------------------------------------------------------------------------------------------------------------------------|---------|
| <b>Supplementary table S1.</b> Pubmed search                                                                                                                                                                                                      | page 2  |
| <b>Supplementary table S2.</b> Embase search                                                                                                                                                                                                      | page 6  |
| <b>Supplementary table S3.</b> Cochrane library search                                                                                                                                                                                            | page 9  |
| <b>Supplementary table S4.</b> Overview of RCTs that were not incorporated in one of the included meta-analyses and had a too small sample size (<50% of infants in the meta-analysis on the same intervention) to be included as separate trial. | page 15 |
| <b>Supplementary table S5.</b> Overview included experimental animal studies on enteral feeding interventions for prevention of NEC                                                                                                               | page 17 |
| <b>Supplementary table S6.</b> Overview included clinical trials on enteral feeding interventions for prevention of NEC in human infants                                                                                                          | page 61 |
| <b>Supplementary table S7.</b> Overview included systematic reviews and meta-analysis on enteral feeding interventions for prevention of NEC in human infants                                                                                     | page 72 |
| <b>Supplementary table S8.</b> Risk of bias assessment of the included experimental animal studies (SYRCLE's risk of bias tool)                                                                                                                   | page 76 |
| <b>Supplementary table S9.</b> Risk of bias assessment of the included RCTs (Jadad scoring system)                                                                                                                                                | page 77 |
| <b>Supplementary table S10.</b> Risk of bias assessment of the included meta-analyses (AMSTAR measurement tool)                                                                                                                                   | page 77 |
| <b>Supplementary table S11.</b> GRADE approach scoring of clinical studies                                                                                                                                                                        | page 78 |

**Supplementary table S1.** Pubmed search

| Search title                                                      | Search terms used in Pubmed                                                                                                                                                                                                                                                                                                                                                                                                                                                                                                                                                                                                                                                                                                                                                                                                                                                                                                                                                                                                                                                                                                                                                                                                                                                                                                                                                                                                                                                                                                                                                                                                                                                                                                                                                            |
|-------------------------------------------------------------------|----------------------------------------------------------------------------------------------------------------------------------------------------------------------------------------------------------------------------------------------------------------------------------------------------------------------------------------------------------------------------------------------------------------------------------------------------------------------------------------------------------------------------------------------------------------------------------------------------------------------------------------------------------------------------------------------------------------------------------------------------------------------------------------------------------------------------------------------------------------------------------------------------------------------------------------------------------------------------------------------------------------------------------------------------------------------------------------------------------------------------------------------------------------------------------------------------------------------------------------------------------------------------------------------------------------------------------------------------------------------------------------------------------------------------------------------------------------------------------------------------------------------------------------------------------------------------------------------------------------------------------------------------------------------------------------------------------------------------------------------------------------------------------------|
| general feeding interventions                                     | ((("feeding"[All Fields] OR "feedings"[All Fields] OR "feeds"[All Fields]) AND ("intervention s"[All Fields] OR "interventions"[All Fields] OR "interventive"[All Fields] OR "methods"[MeSH Terms] OR "methods"[All Fields] OR "intervention"[All Fields] OR "interventional"[All Fields])) OR (("nutrition s"[All Fields] OR "nutritional status"[MeSH Terms] OR ("nutritional"[All Fields] AND "status"[All Fields]) OR "nutritional status"[All Fields] OR "nutrition"[All Fields] OR "nutritional sciences"[MeSH Terms] OR ("nutritional"[All Fields] AND "sciences"[All Fields]) OR "nutritional sciences"[All Fields] OR "nutritional"[All Fields] OR "nutritionals"[All Fields] OR "nutritions"[All Fields] OR "nutritive"[All Fields]) AND ("intervention s"[All Fields] OR "interventions"[All Fields] OR "interventive"[All Fields] OR "methods"[MeSH Terms] OR "methods"[All Fields] OR "intervention"[All Fields] OR "interventional"[All Fields])) OR ("feeding"[All Fields] OR "feedings"[All Fields] OR "feeds"[All Fields]) OR ("nutrition s"[All Fields] OR "nutritional status"[MeSH Terms] OR ("nutritional"[All Fields] AND "status"[All Fields]) OR "nutritional status"[All Fields] OR "nutrition"[All Fields] OR "nutritional sciences"[MeSH Terms] OR ("nutritional"[All Fields] AND "sciences"[All Fields]) OR "nutritional sciences"[All Fields] OR "nutritional"[All Fields] OR "nutritionals"[All Fields] OR "nutritions"[All Fields] OR "nutritive"[All Fields])) AND ("necrotising enterocolitis"[All Fields] OR "enterocolitis, necrotizing"[MeSH Terms] OR ("enterocolitis"[All Fields] AND "necrotizing"[All Fields]) OR "necrotizing enterocolitis"[All Fields] OR ("necrotizing"[All Fields] AND "enterocolitis"[All Fields]) OR "NEC"[All Fields]) |
| alkaline phosphatase                                              | ("alkaline phosphatase"[MeSH Terms] OR ("alkaline"[All Fields] AND "phosphatase"[All Fields]) OR "alkaline phosphatase"[All Fields] OR "ALP"[All Fields]) AND ("necrotising enterocolitis"[All Fields] OR "enterocolitis, necrotizing"[MeSH Terms] OR ("enterocolitis"[All Fields] AND "necrotizing"[All Fields]) OR "necrotizing enterocolitis"[All Fields] OR ("necrotizing"[All Fields] AND "enterocolitis"[All Fields]) OR "NEC"[All Fields])                                                                                                                                                                                                                                                                                                                                                                                                                                                                                                                                                                                                                                                                                                                                                                                                                                                                                                                                                                                                                                                                                                                                                                                                                                                                                                                                      |
| epidermal growth factor<br>heparin-binding EGF like growth factor | ("EGF"[All Fields] OR ("epidermal growth factor"[MeSH Terms] OR ("epidermal"[All Fields] AND "growth"[All Fields] AND "factor"[All Fields]) OR "epidermal growth factor"[All Fields]) OR ("heparin binding egf like growth factor"[MeSH Terms] OR ("heparin binding"[All Fields] AND "egf like"[All Fields] AND "growth"[All Fields] AND "factor"[All Fields]) OR "heparin binding egf like growth factor"[All Fields] OR ("hb"[All Fields] AND "EGF"[All Fields]) OR "hb egf"[All Fields]) OR ("heparin binding egf like growth factor"[MeSH Terms] OR ("heparin binding"[All Fields] AND "egf like"[All Fields] AND "growth"[All Fields] AND "factor"[All Fields]) OR "heparin binding egf like growth factor"[All Fields] OR ("heparin"[All Fields] AND "binding"[All Fields] AND "EGF"[All Fields] AND "like"[All Fields] AND "growth"[All Fields] AND "factor"[All Fields]) OR "heparin binding egf like growth factor"[All Fields])) AND ("necrotising enterocolitis"[All Fields] OR "enterocolitis, necrotizing"[MeSH Terms] OR ("enterocolitis"[All Fields] AND "necrotizing"[All Fields]) OR "necrotizing enterocolitis"[All Fields] OR ("necrotizing"[All Fields] AND "enterocolitis"[All Fields]) OR "NEC"[All Fields])                                                                                                                                                                                                                                                                                                                                                                                                                                                                                                                                                     |
| erythropoietin                                                    | ("erythropoietin"[MeSH Terms] OR "erythropoietin"[All Fields] OR "epoetin alfa"[MeSH Terms] OR ("epoetin"[All Fields] AND "alfa"[All Fields]) OR "epoetin alfa"[All Fields] OR "erythropoietins"[All Fields] OR "erythropoietin s"[All Fields] OR "EPO"[All                                                                                                                                                                                                                                                                                                                                                                                                                                                                                                                                                                                                                                                                                                                                                                                                                                                                                                                                                                                                                                                                                                                                                                                                                                                                                                                                                                                                                                                                                                                            |

|                            |                                                                                                                                                                                                                                                                                                                                                                                                                                                                                                                                                                                                                                                                                                                                                                                                 |
|----------------------------|-------------------------------------------------------------------------------------------------------------------------------------------------------------------------------------------------------------------------------------------------------------------------------------------------------------------------------------------------------------------------------------------------------------------------------------------------------------------------------------------------------------------------------------------------------------------------------------------------------------------------------------------------------------------------------------------------------------------------------------------------------------------------------------------------|
|                            | Fields)) AND ("necrotising enterocolitis"[All Fields] OR "enterocolitis, necrotizing"[MeSH Terms] OR ("enterocolitis"[All Fields] AND "necrotizing"[All Fields]) OR "necrotizing enterocolitis"[All Fields] OR ("necrotizing"[All Fields] AND "enterocolitis"[All Fields]) OR "NEC"[All Fields])                                                                                                                                                                                                                                                                                                                                                                                                                                                                                                |
| exosomes                   | ("exosomal"[All Fields] OR "exosomes"[MeSH Terms] OR "exosomes"[All Fields] OR "exosome"[All Fields] OR "exosomic"[All Fields] OR ("extracellular vesicles"[MeSH Terms] OR ("extracellular"[All Fields] AND "vesicles"[All Fields]) OR "extracellular vesicles"[All Fields]) OR ("cell derived microparticles"[MeSH Terms] OR ("cell derived"[All Fields] AND "microparticles"[All Fields]) OR "cell derived microparticles"[All Fields] OR "microvesicle"[All Fields] OR "microvesicles"[All Fields])) AND ("necrotising enterocolitis"[All Fields] OR "enterocolitis, necrotizing"[MeSH Terms] OR ("enterocolitis"[All Fields] AND "necrotizing"[All Fields]) OR "necrotizing enterocolitis"[All Fields] OR ("necrotizing"[All Fields] AND "enterocolitis"[All Fields]) OR "NEC"[All Fields]) |
| ganglioside                | ("gangliosides"[MeSH Terms] OR "gangliosides"[All Fields] OR "ganglioside"[All Fields] OR "gangliosidic"[All Fields] OR "GD3"[All Fields] OR "GM"[All Fields]) AND ("necrotising enterocolitis"[All Fields] OR "enterocolitis, necrotizing"[MeSH Terms] OR ("enterocolitis"[All Fields] AND "necrotizing"[All Fields]) OR "necrotizing enterocolitis"[All Fields] OR ("necrotizing"[All Fields] AND "enterocolitis"[All Fields]) OR "NEC"[All Fields])                                                                                                                                                                                                                                                                                                                                          |
| glutamine                  | ("Gln"[All Fields] OR ("glutamine"[MeSH Terms] OR "glutamine"[All Fields] OR "l glutamine"[All Fields]) OR ("glutamin"[All Fields] OR "glutamine"[MeSH Terms] OR "glutamine"[All Fields] OR "glutamine s"[All Fields] OR "glutamines"[All Fields])) AND ("necrotising enterocolitis"[All Fields] OR "enterocolitis, necrotizing"[MeSH Terms] OR ("enterocolitis"[All Fields] AND "necrotizing"[All Fields]) OR "necrotizing enterocolitis"[All Fields] OR ("necrotizing"[All Fields] AND "enterocolitis"[All Fields]) OR "NEC"[All Fields])                                                                                                                                                                                                                                                     |
| immunoglobulins            | ("immunoglobulin s"[All Fields] OR "immunoglobuline"[All Fields] OR "immunoglobulines"[All Fields] OR "immunoglobulins"[MeSH Terms] OR "immunoglobulins"[All Fields] OR "immunoglobulin"[All Fields] OR ("immunoglobulin g"[MeSH Terms] OR "immunoglobulin g"[All Fields] OR "igg"[All Fields]) OR ("immunoglobulin a"[MeSH Terms] OR "immunoglobulin a"[All Fields] OR "iga"[All Fields])) AND ("necrotising enterocolitis"[All Fields] OR "enterocolitis, necrotizing"[MeSH Terms] OR ("enterocolitis"[All Fields] AND "necrotizing"[All Fields]) OR "necrotizing enterocolitis"[All Fields] OR ("necrotizing"[All Fields] AND "enterocolitis"[All Fields]) OR "NEC"[All Fields])                                                                                                             |
| insulin like growth factor | ("somatomedins"[MeSH Terms] OR "somatomedins"[All Fields] OR ("insulin"[All Fields] AND "like"[All Fields] AND "growth"[All Fields] AND "factor"[All Fields]) OR "insulin like growth factor"[All Fields] OR "ILGF1"[All Fields] OR "IGF1"[All Fields]) AND ("necrotising enterocolitis"[All Fields] OR "enterocolitis, necrotizing"[MeSH Terms] OR ("enterocolitis"[All Fields] AND "necrotizing"[All Fields]) OR "necrotizing enterocolitis"[All Fields] OR ("necrotizing"[All Fields] AND "enterocolitis"[All Fields]) OR "NEC"[All Fields])                                                                                                                                                                                                                                                 |
| milk fat globule membrane  | ((("milk fat globule"[Supplementary Concept] OR "milk fat globule"[All Fields]) AND ("membranal"[All Fields] OR "membrane s"[All Fields] OR "membranous"[All Fields] OR "membranes"[MeSH Terms] OR "membranes"[All Fields] OR "membrane"[All Fields] OR "membranous"[All Fields])) OR ("milk fat globule"[Supplementary Concept] OR "milk fat globule"[All Fields])) AND                                                                                                                                                                                                                                                                                                                                                                                                                        |

|                                               |                                                                                                                                                                                                                                                                                                                                                                                                                                                                                                                                                                                                                                                                                                                                                                                                                                                                                                                                                                                                                                                                                                                                                                                                                           |
|-----------------------------------------------|---------------------------------------------------------------------------------------------------------------------------------------------------------------------------------------------------------------------------------------------------------------------------------------------------------------------------------------------------------------------------------------------------------------------------------------------------------------------------------------------------------------------------------------------------------------------------------------------------------------------------------------------------------------------------------------------------------------------------------------------------------------------------------------------------------------------------------------------------------------------------------------------------------------------------------------------------------------------------------------------------------------------------------------------------------------------------------------------------------------------------------------------------------------------------------------------------------------------------|
|                                               | ("necrotising enterocolitis"[All Fields] OR "enterocolitis, necrotizing"[MeSH Terms] OR ("enterocolitis"[All Fields] AND "necrotizing"[All Fields]) OR "necrotizing enterocolitis"[All Fields] OR ("necrotizing"[All Fields] AND "enterocolitis"[All Fields]) OR "NEC"[All Fields])                                                                                                                                                                                                                                                                                                                                                                                                                                                                                                                                                                                                                                                                                                                                                                                                                                                                                                                                       |
| oligosaccharides                              | ("gos"[All Fields] OR "FOS"[All Fields] OR ("oligosaccharides"[MeSH Terms] OR "oligosaccharides"[All Fields] OR "oligosaccharide"[All Fields] OR "oligosaccharidic"[All Fields]) AND ("necrotising enterocolitis"[All Fields] OR "enterocolitis, necrotizing"[MeSH Terms] OR ("enterocolitis"[All Fields] AND "necrotizing"[All Fields]) OR "necrotizing enterocolitis"[All Fields] OR ("necrotizing"[All Fields] AND "enterocolitis"[All Fields]) OR "NEC"[All Fields])                                                                                                                                                                                                                                                                                                                                                                                                                                                                                                                                                                                                                                                                                                                                                  |
| osteopontin                                   | ("osteopontin"[MeSH Terms] OR "osteopontin"[All Fields] OR "osteopontine"[All Fields] OR "osteopontins"[All Fields] OR ("opt photonics news"[Journal] OR "opn"[All Fields])) AND ("necrotising enterocolitis"[All Fields] OR "enterocolitis, necrotizing"[MeSH Terms] OR ("enterocolitis"[All Fields] AND "necrotizing"[All Fields]) OR "necrotizing enterocolitis"[All Fields] OR ("necrotizing"[All Fields] AND "enterocolitis"[All Fields]) OR "NEC"[All Fields])                                                                                                                                                                                                                                                                                                                                                                                                                                                                                                                                                                                                                                                                                                                                                      |
| platelet-activating factor<br>acetylhydrolase | ("PAF-AH"[All Fields] OR (("platelet activating factor"[MeSH Terms] OR ("platelet"[All Fields] AND "activating"[All Fields] AND "factor"[All Fields]) OR "platelet activating factor"[All Fields]) AND ("acetylhydrolase"[All Fields] OR "acetylhydrolases"[All Fields]))) AND ("necrotising enterocolitis"[All Fields] OR "enterocolitis, necrotizing"[MeSH Terms] OR ("enterocolitis"[All Fields] AND "necrotizing"[All Fields]) OR "necrotizing enterocolitis"[All Fields] OR ("necrotizing"[All Fields] AND "enterocolitis"[All Fields]) OR "NEC"[All Fields])                                                                                                                                                                                                                                                                                                                                                                                                                                                                                                                                                                                                                                                        |
| polyunsaturated fatty acid                    | ("PUFA"[All Fields] OR ("fatty acids, unsaturated"[MeSH Terms] OR ("fatty"[All Fields] AND "acids"[All Fields] AND "unsaturated"[All Fields]) OR "unsaturated fatty acids"[All Fields] OR ("polyunsaturated"[All Fields] AND "fatty"[All Fields] AND "acid"[All Fields]) OR "polyunsaturated fatty acid"[All Fields]) OR ("fatty acids, omega 3"[MeSH Terms] OR ("fatty"[All Fields] AND "acids"[All Fields] AND "omega 3"[All Fields]) OR "omega-3 fatty acids"[All Fields] OR "omega 3 fatty acids"[All Fields]) OR ("fatty acids, omega 6"[MeSH Terms] OR ("fatty"[All Fields] AND "acids"[All Fields] AND "omega 6"[All Fields]) OR "omega-6 fatty acids"[All Fields] OR "omega 6 fatty acids"[All Fields]) OR ("long"[All Fields] AND ("chain"[All Fields] OR "chain s"[All Fields] OR "chains"[All Fields]) AND ("fatty acids"[MeSH Terms] OR ("fatty"[All Fields] AND "acids"[All Fields]) OR "fatty acids"[All Fields]))) AND ("necrotising enterocolitis"[All Fields] OR "enterocolitis, necrotizing"[MeSH Terms] OR ("enterocolitis"[All Fields] AND "necrotizing"[All Fields]) OR "necrotizing enterocolitis"[All Fields] OR ("necrotizing"[All Fields] AND "enterocolitis"[All Fields]) OR "NEC"[All Fields]) |
| transforming growth factor<br>β               | ("transforming growth factor beta"[MeSH Terms] OR ("transforming"[All Fields] AND "growth"[All Fields] AND "factor"[All Fields] AND "beta"[All Fields]) OR "transforming growth factor beta"[All Fields] OR "tgfbeta1"[All Fields] OR ("tgfbeta s"[All Fields] OR "tgfbetas"[All Fields] OR "transforming growth factor beta"[MeSH Terms] OR ("transforming"[All Fields] AND "growth"[All Fields] AND "factor"[All Fields] AND "beta"[All Fields]) OR "transforming growth factor beta"[All Fields] OR "tgfbeta"[All Fields])) AND ("necrotising enterocolitis"[All Fields] OR "enterocolitis, necrotizing"[MeSH Terms] OR ("enterocolitis"[All Fields] AND "necrotizing"[All Fields]) OR "necrotizing enterocolitis"[All Fields] OR ("necrotizing"[All Fields] AND "enterocolitis"[All Fields]) OR "NEC"[All Fields])                                                                                                                                                                                                                                                                                                                                                                                                    |

|           |                                                                                                                                                                                                                                                                                                                                                                                                                                                                                                                                                                                                                                                                                                                                                   |
|-----------|---------------------------------------------------------------------------------------------------------------------------------------------------------------------------------------------------------------------------------------------------------------------------------------------------------------------------------------------------------------------------------------------------------------------------------------------------------------------------------------------------------------------------------------------------------------------------------------------------------------------------------------------------------------------------------------------------------------------------------------------------|
| vitamin A | ("vitamin a"[MeSH Terms] OR "vitamin a"[All Fields] OR ("tretinoin"[MeSH Terms] OR "tretinoin"[All Fields] OR ("trans"[All Fields] AND "retinoic"[All Fields] AND "acid"[All Fields]) OR "all trans retinoic acid"[All Fields]) OR ("vitamin a"[MeSH Terms] OR "vitamin a"[All Fields] OR "retinol"[All Fields] OR "retinols"[All Fields]) OR ("retinoidal"[All Fields] OR "retinoids"[MeSH Terms] OR "retinoids"[All Fields] OR "retinoid"[All Fields])) AND ("necrotising enterocolitis"[All Fields] OR "enterocolitis, necrotizing"[MeSH Terms] OR ("enterocolitis"[All Fields] AND "necrotizing"[All Fields]) OR "necrotizing enterocolitis"[All Fields] OR ("necrotizing"[All Fields] AND "enterocolitis"[All Fields]) OR "NEC"[All Fields]) |
| vitamin D | ("vitamin d"[MeSH Terms] OR "vitamin d"[All Fields] OR "ergocalciferols"[MeSH Terms] OR "ergocalciferols"[All Fields] OR ("cholecalciferol"[MeSH Terms] OR "cholecalciferol"[All Fields] OR "cholecalciferols"[All Fields] OR "colecalfiferol"[All Fields]) OR ("ergocalciferols"[MeSH Terms] OR "ergocalciferols"[All Fields] OR "ergocalciferol"[All Fields]) OR "D2"[All Fields] OR "D3"[All Fields]) AND ("necrotising enterocolitis"[All Fields] OR "enterocolitis, necrotizing"[MeSH Terms] OR ("enterocolitis"[All Fields] AND "necrotizing"[All Fields]) OR "necrotizing enterocolitis"[All Fields] OR ("necrotizing"[All Fields] AND "enterocolitis"[All Fields]) OR "NEC"[All Fields])                                                  |

## Supplementary table S2. Embase search

| <input type="checkbox"/> | # ▲ | Searches                                 | Results | Type     |
|--------------------------|-----|------------------------------------------|---------|----------|
| <input type="checkbox"/> | 1   | necrotizing enterocolitis/               | 12218   | Advanced |
| <input type="checkbox"/> | 2   | nutrition/                               | 109194  | Advanced |
| <input type="checkbox"/> | 3   | feeding/                                 | 52256   | Advanced |
| <input type="checkbox"/> | 4   | 2 or 3                                   | 158880  | Advanced |
| <input type="checkbox"/> | 5   | 1 and 4                                  | 533     | Advanced |
| <input type="checkbox"/> | 6   | limit 5 to yr="1883 - 2020"              | 513     | Advanced |
| <input type="checkbox"/> | 7   | erythropoietin/                          | 36171   | Advanced |
| <input type="checkbox"/> | 8   | 1 and 7                                  | 105     | Advanced |
| <input type="checkbox"/> | 9   | limit 8 to yr="1883 - 2020"              | 102     | Advanced |
| <input type="checkbox"/> | 10  | alkaline phosphatase/                    | 110896  | Advanced |
| <input type="checkbox"/> | 11  | 1 and 10                                 | 79      | Advanced |
| <input type="checkbox"/> | 12  | limit 11 to yr="1883 - 2020"             | 79      | Advanced |
| <input type="checkbox"/> | 13  | glutamine/                               | 41784   | Advanced |
| <input type="checkbox"/> | 14  | 1 and 13                                 | 92      | Advanced |
| <input type="checkbox"/> | 15  | limit 14 to yr="1883 - 2020"             | 92      | Advanced |
| <input type="checkbox"/> | 16  | epidermal growth factor/                 | 41340   | Advanced |
| <input type="checkbox"/> | 17  | heparin binding epidermal growth factor/ | 2781    | Advanced |
| <input type="checkbox"/> | 18  | 16 or 17                                 | 43596   | Advanced |
| <input type="checkbox"/> | 19  | 1 and 18                                 | 161     | Advanced |
| <input type="checkbox"/> | 20  | limit 19 to yr="1883 - 2020"             | 160     | Advanced |
| <input type="checkbox"/> | 21  | exosome/                                 | 32781   | Advanced |
| <input type="checkbox"/> | 22  | 1 and 21                                 | 33      | Advanced |
| <input type="checkbox"/> | 23  | limit 22 to yr="1883 - 2020"             | 30      | Advanced |
| <input type="checkbox"/> | 24  | ganglioside/                             | 9435    | Advanced |
| <input type="checkbox"/> | 25  | 1 and 24                                 | 8       | Advanced |

|                          |    |                                  |       |          |
|--------------------------|----|----------------------------------|-------|----------|
| <input type="checkbox"/> | 26 | limit 25 to yr="1883 - 2020"     | 8     | Advanced |
| <input type="checkbox"/> | 27 | somatomedin/                     | 16114 | Advanced |
| <input type="checkbox"/> | 28 | 1 and 27                         | 17    | Advanced |
| <input type="checkbox"/> | 29 | limit 28 to yr="1883 - 2020"     | 17    | Advanced |
| <input type="checkbox"/> | 30 | milk fat/                        | 2925  | Advanced |
| <input type="checkbox"/> | 31 | 1 and 30                         | 10    | Advanced |
| <input type="checkbox"/> | 32 | limit 31 to yr="1883 - 2020"     | 9     | Advanced |
| <input type="checkbox"/> | 33 | osteopontin/                     | 17679 | Advanced |
| <input type="checkbox"/> | 34 | 1 and 33                         | 8     | Advanced |
| <input type="checkbox"/> | 35 | limit 34 to yr="1883 - 2020"     | 8     | Advanced |
| <input type="checkbox"/> | 36 | oligosaccharide/                 | 25624 | Advanced |
| <input type="checkbox"/> | 37 | 1 and 36                         | 113   | Advanced |
| <input type="checkbox"/> | 38 | limit 37 to yr="1883 - 2020"     | 110   | Advanced |
| <input type="checkbox"/> | 39 | polyunsaturated fatty acid/      | 22681 | Advanced |
| <input type="checkbox"/> | 40 | 1 and 39                         | 62    | Advanced |
| <input type="checkbox"/> | 41 | limit 40 to yr="1883 - 2020"     | 61    | Advanced |
| <input type="checkbox"/> | 42 | retinoic acid/                   | 43088 | Advanced |
| <input type="checkbox"/> | 43 | 1 and 42                         | 12    | Advanced |
| <input type="checkbox"/> | 44 | limit 43 to yr="1883 - 2020"     | 12    | Advanced |
| <input type="checkbox"/> | 45 | transforming growth factor beta/ | 86269 | Advanced |
| <input type="checkbox"/> | 46 | 1 and 45                         | 59    | Advanced |
| <input type="checkbox"/> | 47 | limit 46 to yr="1883 - 2020"     | 58    | Advanced |
| <input type="checkbox"/> | 48 | vitamin D/                       | 79604 | Advanced |
| <input type="checkbox"/> | 49 | 1 and 48                         | 57    | Advanced |
| <input type="checkbox"/> | 50 | limit 49 to yr="1883 - 2020"     | 56    | Advanced |

|                          |    |                                                 |        |          |
|--------------------------|----|-------------------------------------------------|--------|----------|
| <input type="checkbox"/> | 51 | immunoglobulin/                                 | 120054 | Advanced |
| <input type="checkbox"/> | 52 | 1 and 51                                        | 168    | Advanced |
| <input type="checkbox"/> | 53 | limit 52 to yr="1945 - 2020"                    | 168    | Advanced |
| <input type="checkbox"/> | 54 | 1 alkyl 2 acetylglycerophosphocholine esterase/ | 2314   | Advanced |
| <input type="checkbox"/> | 55 | 1 and 54                                        | 19     | Advanced |
| <input type="checkbox"/> | 56 | limit 55 to yr="1883 - 2020"                    | 19     | Advanced |



**Supplementary table S3. Cochrane library search**

|                                                                         |                          |     |        |        |       |
|-------------------------------------------------------------------------|--------------------------|-----|--------|--------|-------|
| #1                                                                      | feeding intervention     | S ▼ | MeSH ▼ | Limits | 9442  |
| #2                                                                      | nutritional intervention |     |        | Limits | 13452 |
| #3                                                                      | feeding                  |     |        | Limits | 23499 |
| #4                                                                      | nutrition                |     |        | Limits | 55842 |
| #5                                                                      | nerotizing enterocolitis |     |        | Limits | 1999  |
| #6                                                                      | NEC                      |     |        | Limits | 998   |
| #7                                                                      | #1 OR #2 OR #3 OR #4     |     |        | Limits | 77042 |
| #8                                                                      | #5 OR #6                 |     |        | Limits | 2344  |
| #9                                                                      | #7 AND #8                |     |        | Limits | 922   |
| #10                                                                     | #7 AND #8                |     |        | Limits | 185   |
| with Cochrane Library publication date to Jan 2021, in Cochrane Reviews |                          |     |        |        |       |
| #11                                                                     | erythropoietin           |     |        | Limits | 4358  |
| #12                                                                     | EPO                      |     |        | Limits | 2290  |
| #13                                                                     | #11 OR #12               |     |        | Limits | 4821  |
| #14                                                                     | #13 AND #8               |     |        | Limits | 44    |
| #15                                                                     | #13 AND #8               |     |        | Limits | 11    |
| with Cochrane Library publication date to Jan 2021, in Cochrane Reviews |                          |     |        |        |       |
| #16                                                                     | alkaline phosphatase     |     |        | Limits | 5916  |
| #17                                                                     | ALPI                     |     |        | Limits | 30    |
| #18                                                                     | #16 OR #17               |     |        | Limits | 5946  |
| #19                                                                     | #18 AND #8               |     |        | Limits | 30    |
| #20                                                                     | #18 AND #8               |     |        | Limits | 13    |
| with Cochrane Library publication date to Jan 2021, in Cochrane Reviews |                          |     |        |        |       |

|                                                                         |                                        |        |      |
|-------------------------------------------------------------------------|----------------------------------------|--------|------|
| #21                                                                     | Gln                                    | Limits | 325  |
| #22                                                                     | L-glutamine                            | Limits | 241  |
| #23                                                                     | glutamine                              | Limits | 2098 |
| #24                                                                     | #21 OR #22 OR #23                      | Limits | 2159 |
| #25                                                                     | #24 AND #8                             | Limits | 27   |
| #26                                                                     | #24 AND #8                             | Limits | 7    |
| with Cochrane Library publication date to Jan 2021, in Cochrane Reviews |                                        |        |      |
| #27                                                                     | EGF                                    | Limits | 603  |
| #28                                                                     | epidermal growth factor                | Limits | 4834 |
| #29                                                                     | HB-EGF                                 | Limits | 16   |
| #30                                                                     | heparin-binding EGF like growth factor | Limits | 10   |
| #31                                                                     | #27 OR #28 OR #29 OR #30               | Limits | 5067 |
| #32                                                                     | #31 AND #8                             | Limits | 6    |
| #33                                                                     | #31 AND #8                             | Limits | 2    |
| with Cochrane Library publication date to Jan 2021, in Cochrane Reviews |                                        |        |      |
| #34                                                                     | exosomes                               | Limits | 106  |
| #35                                                                     | extracellular vesicles                 | Limits | 118  |
| #36                                                                     | microvesicles                          | Limits | 48   |
| #37                                                                     | #34 OR #35 OR #36                      | Limits | 250  |
| #38                                                                     | #37 AND #8                             | Limits | 2    |
| #39                                                                     | #37 AND #8                             | Limits | 0    |
| with Cochrane Library publication date to Jan 2021, in Cochrane Reviews |                                        |        |      |
| #40                                                                     | ganglioside                            | Limits | 231  |

|                                                                         |                            |        |       |
|-------------------------------------------------------------------------|----------------------------|--------|-------|
| #41                                                                     | GD3                        | Limits | 27    |
| #42                                                                     | GM                         | Limits | 15436 |
| #43                                                                     | #40 OR #41 OR #42          | Limits | 15654 |
| #44                                                                     | #43 AND #8                 | Limits | 59    |
| #45                                                                     | #43 AND #8                 | Limits | 16    |
| with Cochrane Library publication date to Jan 2021, in Cochrane Reviews |                            |        |       |
| #46                                                                     | insulin like growth factor | Limits | 3538  |
| #47                                                                     | ILGF1                      | Limits | 0     |
| #48                                                                     | IGF1                       | Limits | 245   |
| #49                                                                     | #46 OR #47 OR #48          | Limits | 3667  |
| #50                                                                     | #49 AND #8                 | Limits | 29    |
| #51                                                                     | #49 AND #8                 | Limits | 22    |
| with Cochrane Library publication date to Jan 2021, in Cochrane Reviews |                            |        |       |
| #52                                                                     | milk fat globule membrane  | Limits | 61    |
| #53                                                                     | milk fat globule           | Limits | 78    |
| #54                                                                     | #52 OR #53                 | Limits | 78    |
| #55                                                                     | #54 AND #8                 | Limits | 2     |
| #56                                                                     | #54 AND #8                 | Limits | 2     |
| with Cochrane Library publication date to Jan 2021, in Cochrane Reviews |                            |        |       |
| #57                                                                     | osteopontin                | Limits | 232   |
| #58                                                                     | OPN                        | Limits | 273   |
| #59                                                                     | #57 OR #58                 | Limits | 429   |
| #60                                                                     | #59 AND #8                 | Limits | 1     |

|                                                                         |                                 |        |       |
|-------------------------------------------------------------------------|---------------------------------|--------|-------|
| #61                                                                     | #59 AND #8                      | Limits | 0     |
| with Cochrane Library publication date to Jan 2021, in Cochrane Reviews |                                 |        |       |
| #62                                                                     | GOS                             | Limits | 894   |
| #63                                                                     | FOS                             | Limits | 505   |
| #64                                                                     | oligosaccharides                | Limits | 1012  |
| #65                                                                     | HMO                             | Limits | 427   |
| #66                                                                     | #62 OR #63 OR #64 OR #65        | Limits | 2424  |
| #67                                                                     | #66 AND #8                      | Limits | 30    |
| #68                                                                     | #66 AND #8                      | Limits | 13    |
| with Cochrane Library publication date to Jan 2021, in Cochrane Reviews |                                 |        |       |
| #69                                                                     | PUFA                            | Limits | 2024  |
| #70                                                                     | polyunsaturated fatty acid      | Limits | 2790  |
| #71                                                                     | omega 3 fatty acids             | Limits | 4973  |
| #72                                                                     | omega 6 fatty acids             | Limits | 2924  |
| #73                                                                     | long chain fatty acids          | Limits | 1748  |
| #74                                                                     | #69 OR #70 OR #71 OR #72 OR #73 | Limits | 7515  |
| #75                                                                     | #74 AND #8                      | Limits | 33    |
| #76                                                                     | #74 AND #8                      | Limits | 14    |
| with Cochrane Library publication date to Jan 2021, in Cochrane Reviews |                                 |        |       |
| #77                                                                     | vitamin A                       | Limits | 27965 |
| #78                                                                     | all trans retinoic acid         | Limits | 413   |
| #79                                                                     | retinol                         | Limits | 2262  |
| #80                                                                     | retinoids                       | Limits | 504   |

|                                                                         |                                 |        |       |
|-------------------------------------------------------------------------|---------------------------------|--------|-------|
| #81                                                                     | #77 OR #78 OR #79 OR #80        | Limits | 29410 |
| #82                                                                     | #81 AND #8                      | Limits | 109   |
| #83                                                                     | #81 AND #8                      | Limits | 44    |
| with Cochrane Library publication date to Jan 2021, in Cochrane Reviews |                                 |        |       |
| #84                                                                     | transforming growth factor beta | Limits | 869   |
| #85                                                                     | TGFbeta1                        | Limits | 234   |
| #86                                                                     | TGFbeta                         | Limits | 447   |
| #87                                                                     | #84 OR #85 OR #86               | Limits | 1205  |
| #88                                                                     | #87 AND #8                      | Limits | 2     |
| #89                                                                     | #87 AND #8                      | Limits | 1     |
| with Cochrane Library publication date to Jan 2021, in Cochrane Reviews |                                 |        |       |
| #90                                                                     | vitamin D                       | Limits | 17384 |
| #91                                                                     | cholecalciferol                 | Limits | 3066  |
| #92                                                                     | ergocalciferol                  | Limits | 354   |
| #93                                                                     | D2                              | Limits | 4229  |
| #94                                                                     | D3                              | Limits | 5590  |
| #95                                                                     | #90 OR #91 OR #92 OR #93 OR #94 | Limits | 22866 |
| #96                                                                     | #95 AND #8                      | Limits | 76    |
| #97                                                                     | #95 AND #8                      | Limits | 35    |
| with Cochrane Library publication date to Jan 2021, in Cochrane Reviews |                                 |        |       |
| #98                                                                     | immunoglobulins                 | Limits | 2939  |
| #99                                                                     | IgG                             | Limits | 5645  |
| #100                                                                    | IgA                             | Limits | 4221  |

|                                                                         |                                            |        |       |
|-------------------------------------------------------------------------|--------------------------------------------|--------|-------|
| #101                                                                    | #98 OR #99 OR #100                         | Limits | 10801 |
| #102                                                                    | #101 AND #8                                | Limits | 58    |
| #103                                                                    | #101 AND #8                                | Limits | 22    |
| with Cochrane Library publication date to Jan 2021, in Cochrane Reviews |                                            |        |       |
| #104                                                                    | PAF-AH                                     | Limits | 24    |
| #105                                                                    | platelet-activating factor acetylhydrolase | Limits | 28    |
| #106                                                                    | #104 OR #105                               | Limits | 33    |
| #107                                                                    | #106 AND #8                                | Limits | 0     |
| #108                                                                    | #106 AND #8                                | Limits | 0     |
| with Cochrane Library publication date to Jan 2021, in Cochrane Reviews |                                            |        |       |

**Supplementary table S4.** Overview of RCTs that were not incorporated in one of the included meta-analyses and had a too small sample size (<50% of infants in the meta-analysis on the same intervention) to be included as separate trial.

| Author and year                | Type of study and sample size       | In- and exclusion criteria                                                                                                                                                                                                                                                                                                                                                                                                                                                                                                      | Control                                                                                                                                                                         | Intervention                                                                                                                                                                                                                                                                                                                                                                                                                                                                | Effect on NEC incidence                                                                                                           |
|--------------------------------|-------------------------------------|---------------------------------------------------------------------------------------------------------------------------------------------------------------------------------------------------------------------------------------------------------------------------------------------------------------------------------------------------------------------------------------------------------------------------------------------------------------------------------------------------------------------------------|---------------------------------------------------------------------------------------------------------------------------------------------------------------------------------|-----------------------------------------------------------------------------------------------------------------------------------------------------------------------------------------------------------------------------------------------------------------------------------------------------------------------------------------------------------------------------------------------------------------------------------------------------------------------------|-----------------------------------------------------------------------------------------------------------------------------------|
| Cui et al.<br>2019             | single center RCT<br>N=114 neonates | <p>Inclusion: formula fed preterm infants admitted within 12h after birth to the First Neonatal Ward of the Shengjing Hospital of China Medical University, gestational age <math>\geq 30</math> and <math>&lt; 37</math> weeks; birthweight <math>\geq 1500</math> g and <math>\leq 2000</math> g, vital sign and hemodynamic parameters stable.</p> <p>Exclusion: congenital diseases, expected hospitalization <math>&lt; 2</math> weeks, maternal or neonatal antibiotics or probiotics administration before admission</p> | no probiotics (N=57 neonates)                                                                                                                                                   | <p><i>Lactobacillus reuteri</i> DSM 17938, <math>1 \times 10^8</math> CFU (5 drops) once daily, beginning with the first feeding until discharge from the hospital, <i>Lactobacillus reuteri</i> administration was stopped if enteral feeding was stopped due to feeding intolerance and resumed after feedings resumed (N=57 neonates)</p>                                                                                                                                | <p>NEC incidence control group 10.42%</p> <p>NEC incidence intervention group 2.22% (NS)</p>                                      |
| Gómez-Rodríguez et al.<br>2019 | single center RCT<br>N=90 neonates  | <p>Inclusion: preterm newborns, birthweight between 700 and 1500 g and gestational age <math>&lt; 33</math> weeks, no counter indication for enteral feeding in the first 7 days postnatally, inborn in tertiary healthcare from January 2014 to May 2015.</p> <p>Exclusion: birthweight <math>&gt; 1500</math> gram, Apgar score <math>&lt; 6</math> at 5 minutes, gastrointestinal</p>                                                                                                                                        | <p>single strain probiotic containing <math>1 \times 10^9</math> CFU <i>Lactobacillus acidophilus boucardi</i> mixed in the feed each 24h during three weeks, starting from</p> | <p>multispecies probiotic containing <math>1 \times 10^9</math> CFU <i>Lactobacillus acidophilus</i>, <math>4.4 \times 10^8</math> CFU <i>Lactobacillus rhamnosus</i>, <math>1 \times 10^9</math> CFU <i>Lactobacillus casei</i>, <math>1.76 \times 10^8</math> CFU <i>Lactobacillus plantroom</i>, <math>2.76 \times 10^7</math> CFU <i>Bifidobacterium infantis</i> and <math>6.6 \times 10^5</math> CFU <i>Streptococcus thermophiles</i> mixed in the feed each 24h</p> | <p>1 infant developed NEC in the multispecies probiotic group, no infants developed NEC in the single strain probiotics group</p> |

|                             |                                           |                                                                                                                                                                                                                                                                                                                                                                     |                                                                      |                                                                                                                                                                                                                                                     |                                                           |
|-----------------------------|-------------------------------------------|---------------------------------------------------------------------------------------------------------------------------------------------------------------------------------------------------------------------------------------------------------------------------------------------------------------------------------------------------------------------|----------------------------------------------------------------------|-----------------------------------------------------------------------------------------------------------------------------------------------------------------------------------------------------------------------------------------------------|-----------------------------------------------------------|
|                             |                                           | malformations, patent ductus arteriosus with hemodynamic alterations and septic shock                                                                                                                                                                                                                                                                               | day 5<br>(N=45 neonates)                                             | during three weeks, starting from day 5<br>(N=45 neonates)                                                                                                                                                                                          |                                                           |
| Maamouri et al.<br><br>2016 | single center<br>RCT<br>N=105<br>neonates | Inclusion: preterm neonates, gestational age <32 weeks, birth weight <1500 g, Apgar scores >7 at the NICU of the Qaem Hospital affiliated to the Mashhad University of Medical Sciences, Masshad, Iran, informed consent<br><br>Exclusion: discharge before the end of the treatment period, intraventricular hemorrhage, metabolic disease or congenital anomalies | no enteral administration of L-glutamine<br>(N=53 neonates)          | L-glutamine, 0.3 g/kg/day divided in three doses, 5% solution, enterally administered from the 3 <sup>rd</sup> until the 28 <sup>th</sup> day of life<br>(N=52 neonates)                                                                            | OR 0.943 (95% CI 0.883-1.008) (NEC incidence)             |
| Tarnow-Mordi<br><br>2020    | multi center<br>RCT<br>N=1542<br>neonates | Inclusion: birth weight <1500 g, age <8 days<br><br>Exclusion: lethal anomalies, late-onset sepsis before consent,                                                                                                                                                                                                                                                  | no pasteurized bovine lactoferrin added to feeds<br>(N=771 neonates) | pasteurized bovine lactoferrin, 200 mg/kg, once daily added to formula feeding or breast milk, starting immediately after randomization and continued until 34 weeks post-menstrual age or for two weeks (whichever was longer)<br>(N=771 neonates) | RR 1.09 (95% CI 0.63-1.9) (incidence stage II or III NEC) |



**Supplementary table S5.** Overview included experimental animal studies on enteral feeding interventions for prevention of NEC

| Author and year   | Model used                                                                                                                                                                                   | Control                                                                                                                                | Intervention                                                                                                                                                                          | Sample size             | Sample size / power calculation | Outcomes studied                                                                                         |
|-------------------|----------------------------------------------------------------------------------------------------------------------------------------------------------------------------------------------|----------------------------------------------------------------------------------------------------------------------------------------|---------------------------------------------------------------------------------------------------------------------------------------------------------------------------------------|-------------------------|---------------------------------|----------------------------------------------------------------------------------------------------------|
| Akisü et al. 1998 | Balb/c mice (25-30 days old), NEC induction with one time hypoxia-reoxygenation (100% CO <sub>2</sub> for 5 minutes followed by 100% O <sub>2</sub> for 10 minutes), sacrifice after 4 hours | standard mouse chow (triglyceride composition: 45% saturated fatty acids, 40 % monounsaturated fatty acids, 15% n-6 PUFA, 0% n-3 PUFA) | 10% w/w fish oil supplemented mouse chow (triglyceride composition: 40% saturated fatty acids, 30% monounsaturated fatty acids, 18% EPA, 12% DHA), for 4 weeks prior to NEC induction | 18 mice (N=6 per group) | not provided                    | histological NEC incidence/severity<br><br>intestinal inflammation                                       |
| Akisü et al. 2002 | Balb/c mice (25-30 days old), NEC induction with one time hypoxia-reoxygenation (100% CO <sub>2</sub> for 5 minutes followed by 100% O <sub>2</sub> for 10 minutes), sacrifice after 4 hours | physiological saline, 1 mL, by intraperitoneal injection immediately before NEC induction                                              | L-arginine capsule in drinking water, 2 g/L, for 7 days prior to NEC induction<br><br>L-carnitine solution in water, 50 mg/kg orally, for 7 days prior to NEC induction               | 28 mice (N=7 per group) | not provided                    | histological NEC incidence/severity<br><br>vascular function / hypoxia-ischemia / free radical formation |
| Akisü et al. 2003 | Balb/c mice (25-30 days old), NEC induction with one time hypoxia-reoxygenation (100% CO <sub>2</sub> for 5 minutes followed by 100% O <sub>2</sub> for 10 minutes), sacrifice after 4 hours | physiologic saline, 1 mL, by orogastric intubation immediately before NEC induction                                                    | L-glutamine in drinking water, 0.5 g/dL, for 3 days before NEC induction<br><br>L-glutamine in drinking water, 3 g/dL, for 10 days before NEC induction                               | 32 mice (N=8 per group) | not provided                    | histological NEC incidence/severity<br><br>intestinal inflammation                                       |

|                         |                                                                                                                                                                                                                                                                                                                    |                                                              |                                                                                                                                                                                                                                                                       |                              |              |                                                                        |
|-------------------------|--------------------------------------------------------------------------------------------------------------------------------------------------------------------------------------------------------------------------------------------------------------------------------------------------------------------|--------------------------------------------------------------|-----------------------------------------------------------------------------------------------------------------------------------------------------------------------------------------------------------------------------------------------------------------------|------------------------------|--------------|------------------------------------------------------------------------|
| Autran et al.<br>2016   | Sprague-Dawley rats (newborn), NEC induction with formula feeding (200 µL twice daily) and hypoxia (5% O <sub>2</sub> , 95% N <sub>2</sub> for 10 minutes) thrice daily for 4 days                                                                                                                                 | Formula without HMO, GOS or sialylated GOS                   | HMO in formula, 10 mg/ml, simultaneous with NEC induction<br><br>GOS in formula, 8 mg/ml, simultaneous with NEC induction<br><br>sialylated GOS in formula, 500 µM, simultaneous with NEC induction<br><br>2'-FL in formula, 2 mg/ml, simultaneous with NEC induction | 95 rats (N=11-22 per group)  | not provided | histological NEC incidence/severity                                    |
| Bergmann et al.<br>2013 | C57BL/6 mice (newborn), NEC induction with inoculation with a standardized adult commensal bacteria mixture (10 <sup>7</sup> CFU) within 12 hours after birth, formula feeding (30 µL every 3 hours) and asphyxia (100% N <sub>2</sub> for 1 minute) and cold exposure (4°C for 10 minutes) twice daily for 3 days | inoculation with vehicle                                     | <i>Bifidobacterium infantis</i> strain BB-02 (human source), 3x10 <sup>6</sup> CFU in 20 µL in dextrose (immunofluorescence studies) or maltodextran (permeability studies, Western blot, histology), before NEC induction                                            | not provided                 | not provided | histological NEC incidence/severity<br><br>intestinal barrier function |
| Butel et al.<br>1998    | Germ-free quails ( <i>coturnix</i> , <i>coturnix</i> subsp. <i>japonica</i> ) (2 week old), NEC induction with colonization with fecal flora isolated from an infant with NEC and feeding with a 6-8% w/w lactose diet for 21 days                                                                                 | inoculation with a 10-fold dilution of fecal flora in 100 µL | <i>Bifidobacterium infantis-longum</i> strain CUETM 89-215 isolated from stool of a healthy premature infant, 10 <sup>8</sup> viable cells/ml, 100 µL, simultaneous with NEC induction                                                                                | 59 quails (N=8-12 per group) | not provided | histological NEC incidence/severity<br><br>microbiome alterations      |
| Cai et al.<br>2016      | Sprague-Dawley rats (15 days old), NEC induction with asphyxia (100% N <sub>2</sub> for 2 minutes) and cold exposure (4°C                                                                                                                                                                                          | oral saline                                                  | astragaloside IV 25 mg/kg/d orally, simultaneous with NEC induction                                                                                                                                                                                                   | 40 rats (N=10 per group)     | not provided | histological NEC incidence/severity<br><br>intestinal                  |

|                    |                                                                                                                                                                                                                                                                                                                                        |                                                           |                                                                                                                                                                      |                          |              |                                                               |
|--------------------|----------------------------------------------------------------------------------------------------------------------------------------------------------------------------------------------------------------------------------------------------------------------------------------------------------------------------------------|-----------------------------------------------------------|----------------------------------------------------------------------------------------------------------------------------------------------------------------------|--------------------------|--------------|---------------------------------------------------------------|
|                    | for 10 minutes) twice daily for 4 days                                                                                                                                                                                                                                                                                                 |                                                           | astragaloside IV 50 mg/kg/d orally, simultaneous with NEC induction                                                                                                  |                          |              | inflammation                                                  |
|                    |                                                                                                                                                                                                                                                                                                                                        |                                                           | astragaloside IV 75 mg/kg/d orally, simultaneous with NEC induction                                                                                                  |                          |              | systemic inflammation                                         |
|                    |                                                                                                                                                                                                                                                                                                                                        |                                                           |                                                                                                                                                                      |                          |              | vascular function / hypoxia-ischemia / free radical formation |
| Cakir et al. 2018  | Wistar rats (newborn), NEC induction with one time intraperitoneal LPS (1 mg/kg) on day 1, formula feeding (200 µL every 3h and increased by 100 µL daily if tolerated) and asphyxia (100% CO <sub>2</sub> for 10 minutes), hyperoxia (97% O <sub>2</sub> for 5 minutes) and cold exposure (4°C for 10 minutes) twice daily for 3 days | saline, 2 ml/kg, once daily, oral                         | ginger extract in water, 1000 mg/kg, once daily, simultaneous with NEC induction                                                                                     | 30 rats (N=10 per group) | not provided | histological NEC incidence/severity                           |
|                    |                                                                                                                                                                                                                                                                                                                                        |                                                           |                                                                                                                                                                      |                          |              | NEC signs and symptoms                                        |
|                    |                                                                                                                                                                                                                                                                                                                                        |                                                           |                                                                                                                                                                      |                          |              | intestinal inflammation                                       |
|                    |                                                                                                                                                                                                                                                                                                                                        |                                                           |                                                                                                                                                                      |                          |              | vascular function / hypoxia-ischemia / free radical formation |
|                    |                                                                                                                                                                                                                                                                                                                                        |                                                           |                                                                                                                                                                      |                          |              | intestinal epithelial cell death                              |
| Caplan et al. 1997 | Sprague-Dawley rats (newborn), NEC induction with formula feeding (100 µL every 3h and increased to 400 µL on day 4 if tolerated) and asphyxia (100% N <sub>2</sub> for 50 seconds) followed by                                                                                                                                        | 25 µL dilution buffer in each feeding via orogastric tube | rPAF-AH, 80 U in 25 µL dilution buffer in each feeding via orogastric tube, the PAF-AH preparation had 0.8 mg/ml protein and approximately 4000 U/mg PAF-AH activity | 52 rats (N=26 per group) | not provided | histological NEC incidence/severity                           |
|                    |                                                                                                                                                                                                                                                                                                                                        |                                                           |                                                                                                                                                                      |                          |              | NEC survival                                                  |

|                    |                                                                                                                                                                                                                                                                                  |                                                                                                                                                                                                                                      |                                                                                                                                                                                                                                                                                                                                                                                                     |                             |              |                                                                                                                                                                              |
|--------------------|----------------------------------------------------------------------------------------------------------------------------------------------------------------------------------------------------------------------------------------------------------------------------------|--------------------------------------------------------------------------------------------------------------------------------------------------------------------------------------------------------------------------------------|-----------------------------------------------------------------------------------------------------------------------------------------------------------------------------------------------------------------------------------------------------------------------------------------------------------------------------------------------------------------------------------------------------|-----------------------------|--------------|------------------------------------------------------------------------------------------------------------------------------------------------------------------------------|
|                    | cold exposure (4°C for 10 minutes) twice daily for 4 days                                                                                                                                                                                                                        |                                                                                                                                                                                                                                      |                                                                                                                                                                                                                                                                                                                                                                                                     |                             |              |                                                                                                                                                                              |
| Caplan et al. 1999 | Sprague-Dawley rats (newborn on day 21 of gestation), NEC induction with formula feeding (100 µL every 3h and increased to 400 µL on day 4 if tolerated) and asphyxia (100% N <sub>2</sub> for 50 seconds) followed by cold exposure (4°C for 10 minutes) twice daily for 4 days | no administration of <i>Bifidobacterium infantis</i> .<br><br>a second control group was used with administration of <i>Escherichia coli</i> , 10 <sup>9</sup> organisms, once daily, 30 minutes before asphyxia via orogastric tube | <i>Bifidobacterium infantis</i> (human source), 10 <sup>9</sup> organisms, once daily, 30 minutes before asphyxia via orogastric tube, simultaneous with NEC induction                                                                                                                                                                                                                              | 51 rats (N=24-27 per group) | not provided | histological NEC incidence/severity<br><br>NEC survival<br><br>intestinal inflammation<br><br>intestinal barrier function                                                    |
| Caplan et al. 2001 | Sprague-Dawley rats (newborn on day 21 of gestation), NEC induction with formula feeding (100 µL every 3h and increased to 300 µL on day 3 if tolerated) and asphyxia (100% N <sub>2</sub> for 50 seconds) followed by cold exposure (4°C for 10 minutes) twice daily for 3 days | formula without PUFA and nucleotide supplementation (CMP 3.55 mg/100 g formula powder/200 mL water, UMP 6.2 mg/100 g formula powder/200 mL water, IMP 0.73 mg/100 g                                                                  | PUFA in formula, 34 mg/100 mL AA, 23 mg/100 mL DHA, simultaneous with NEC induction<br><br>PUFA and nucleotides in formula, 34 mg/100 mL AA, 23 mg/100 mL DHA, CMP 15.62 mg/100 g formula powder/200 mL water, UMP 9.2 mg/100 g formula powder/200 mL water, IMP 3.06 mg/100 g formula powder/200 mL water, GMP 2.08 mg/100 g formula powder/200 mL water, AMP 03.57 mg/100 g formula powder/200 mL | 95 rats (N=23-24 per group) | not provided | histological NEC incidence/severity<br><br>NEC survival<br><br>intestinal inflammation<br><br>intestinal barrier function<br><br>vascular function / hypoxia-ischemia / free |

|                    |                                                                                                                                                                                                                                  |                                                                                                                           |                                                                                      |                              |              |                                                                                                      |
|--------------------|----------------------------------------------------------------------------------------------------------------------------------------------------------------------------------------------------------------------------------|---------------------------------------------------------------------------------------------------------------------------|--------------------------------------------------------------------------------------|------------------------------|--------------|------------------------------------------------------------------------------------------------------|
|                    |                                                                                                                                                                                                                                  | formula powder/200 mL water, GMP 0.2 mg/100 g formula powder/200 mL water, AMP 0.18 mg/100 g formula powder/200 mL water) | water, simultaneous with NEC induction                                               |                              |              | radical formation<br><br>intestinal epithelial cell death                                            |
| Catala et al. 1999 | Germ-free quails ( <i>coturnix</i> , <i>coturnix</i> subsp. <i>japonica</i> ) (2 week old), NEC induction with colonization with fecal flora isolated from an infant with NEC and feeding with a 6% w/w lactose diet for 21 days | control diet with 6% lactose w/w                                                                                          | diet of 3% FOS and 3% lactose w/w, simultaneous with NEC induction                   | 80 quails (N=8-12 per group) | not provided | NEC signs and symptoms                                                                               |
| Chen et al. 2012   | Sprague-Dawley rats (newborn on day 21 of gestation), NEC induction with formula feeding and asphyxia (100% N <sub>2</sub> for 90 seconds) and cold exposure (4°C for 10 minutes) thrice daily for 3 days                        | formula without recombinant human HB-EGF                                                                                  | recombinant human HB-EGF in formula, 800 µg/kg/dose, simultaneous with NEC induction | 25 rats (N=5-10 per group)   | not provided | intestinal barrier function<br><br>intestinal epithelial proliferation<br><br>enteric nervous system |
| Chen et al. 2019   | C57BL/6 mice (5-9 days old), NEC induction with enteral administration of LPS (4 mg/kg/day) once daily, formula feeding (50 µL/g thrice daily)                                                                                   | control formula                                                                                                           | arginine in formula, 240 mg/kg/day, simultaneous with NEC induction                  | 36 mice (N=8-11 per group)   | not provided | histological NEC incidence/severity<br><br>intestinal inflammation                                   |

|                       |                                                                                                                                                                                                                                                                                                                          |                 |                                                                                                                   |                             |                                                                                                                                                        |                                                                                                                                                                                |
|-----------------------|--------------------------------------------------------------------------------------------------------------------------------------------------------------------------------------------------------------------------------------------------------------------------------------------------------------------------|-----------------|-------------------------------------------------------------------------------------------------------------------|-----------------------------|--------------------------------------------------------------------------------------------------------------------------------------------------------|--------------------------------------------------------------------------------------------------------------------------------------------------------------------------------|
|                       | and hypoxia (5% O <sub>2</sub> for 10 minutes) thrice daily for 4 days                                                                                                                                                                                                                                                   |                 |                                                                                                                   |                             |                                                                                                                                                        | vascular function / hypoxia-ischemia / free radical formation                                                                                                                  |
| Cigsar et al. 2018    | Wistar albino rats (newborn), NEC induction with formula feeding (200 µL twice daily) and asphyxia (100% CO <sub>2</sub> for 10 minutes), hyperoxia (97% O <sub>2</sub> for 10 minutes) and cold exposure (4°C for 10 minutes) twice daily for 3 days                                                                    | no oral sesamol | 97% sesamol orally, 100 mg/kg/dose, twice daily, simultaneous with NEC induction                                  | 34 rats (N=7-9 per group)   | not provided                                                                                                                                           | histological NEC incidence/severity<br><br>NEC signs and symptoms<br><br>vascular function / hypoxia-ischemia / free radical formation<br><br>intestinal epithelial cell death |
| Cilieborg et al. 2016 | Preterm pigs (90% of gestational age, delivered by caesarian section), NEC induction with parenteral nutrition for the first 2 postnatal days (4-6 mL/kg/h) with minimal enteral feeding (2-3 mL/kg per 3 hours) and full enteral nutrition after 2 days with an oral bolus of 15 ml/kg formula every 3 hours for 3 days | control formula | 2'-FL in formula, 5 g/L, during minimal enteral feeding and full enteral feeding, simultaneous with NEC induction | 33 pigs (N=16-17 per group) | Yes, power calculation based on estimated mean and dispersion for NEC incidence (69%, SEM 21%), estimated effect size of 30% and $\beta$ 80%; required | histological NEC incidence/severity<br><br>NEC signs and symptoms<br><br>microbiome alterations<br><br>digestion and absorption                                                |

|                                          |                                                                                                                                                                                                                                                            |                                                                                                   |                                                                                                                        |                                    | sample size<br>17 |                                                                                                                                                |
|------------------------------------------|------------------------------------------------------------------------------------------------------------------------------------------------------------------------------------------------------------------------------------------------------------|---------------------------------------------------------------------------------------------------|------------------------------------------------------------------------------------------------------------------------|------------------------------------|-------------------|------------------------------------------------------------------------------------------------------------------------------------------------|
| Clark et al.<br>2005                     | Sprague-Dawley rats (newborn),<br>NEC induction with formula<br>feeding (100 µL every 3-4 hours)<br>and asphyxia (100% N <sub>2</sub> for 1<br>minute) followed by cold<br>exposure (4°C for 10 minutes)<br>twice daily for 4 days                         | control cow-<br>milk based<br>formula (free of<br>growth factors)                                 | rat EGF in cow-milk based formula,<br>500 ng/mL, simultaneous with NEC<br>induction                                    | unclear                            | not<br>provided   | intestinal<br>epithelial cell<br>death / altered<br>proliferation                                                                              |
| Clark et al.<br>2006                     | Sprague-Dawley rats (newborn<br>on day 21 of gestation), NEC<br>induction with formula feeding<br>(150 µL every 5 hours) and<br>asphyxia (100% N <sub>2</sub> for 1 minute)<br>followed by cold exposure (4°C<br>for 10 minutes) twice daily for 4<br>days | control cow-<br>milk based<br>formula (free of<br>growth factors)                                 | rat EGF in cow-milk based formula,<br>500 ng/mL, simultaneous with NEC<br>induction                                    | 189 rats<br>(N=40-76 per<br>group) | not<br>provided   | NEC survival,<br><br>intestinal barrier<br>function                                                                                            |
| Coursodon-<br>Boyiddle et<br>al.<br>2012 | Sprague-Dawley rats (newborn<br>on day 21 of gestation), NEC<br>induction with formula feeding<br>(850 µL every day in 6 feeds)<br>and asphyxia (100% N <sub>2</sub> for 1<br>minute) and cold exposure (4°C<br>for 10 minutes) twice daily for 4<br>days  | rat milk formula<br>(0.0%<br>conjugated<br>linoleic acid,<br>20.9% n-6<br>PUFA, 3.5% n-3<br>PUFA) | 1.5% pomegranate seed oil in rat<br>milk formula (2.7% conjugated<br>linoleic acid, 20.6% n-6 PUFA, 3.3%<br>n-3 PUFA)  | 60 rats (N=20<br>per group)        | not<br>provided   | histological NEC<br>incidence/severity<br><br>NEC survival,<br><br>intestinal<br>inflammation<br><br>intestinal<br>epithelial<br>proliferation |
| Cuna et al.<br>2020                      | C57BL6 mice (8-11 days old),<br>NEC induction with one time<br>intraperitoneal LPS (5 mg/kg) 12<br>hours before sacrifice, formula                                                                                                                         | vehicle, 0.1 mL,<br>once daily for 2<br>days before<br>NEC induction                              | <i>Lactobacillus rhamnosus</i> GG, 0.1 mL<br>and 10 <sup>7</sup> CFU/mL, once daily for 2<br>days before NEC induction | unclear                            | not<br>provided   | intestinal<br>inflammation<br><br>intestinal barrier                                                                                           |

|                     |                                                                                                                                                                                                                                                 |                                        |                                                                                                                                                                                                                                                     |                          |              |                                                                                                                            |
|---------------------|-------------------------------------------------------------------------------------------------------------------------------------------------------------------------------------------------------------------------------------------------|----------------------------------------|-----------------------------------------------------------------------------------------------------------------------------------------------------------------------------------------------------------------------------------------------------|--------------------------|--------------|----------------------------------------------------------------------------------------------------------------------------|
|                     | feeding (200 µL/5 g body weight twice daily) and hypoxia (5% O <sub>2</sub> for 2 minutes twice daily) for 3 days                                                                                                                               |                                        |                                                                                                                                                                                                                                                     |                          |              | function<br><br>intestinal epithelial cell death                                                                           |
| Dilsiz et al. 2003  | Sprague-Dawley rats (newborn), NEC induction with formula feeding three times a day for 4 days                                                                                                                                                  | formula without supplemented glutamine | glutamine (0.31 mg/kg/day) in formula feeding, simultaneous with NEC induction                                                                                                                                                                      | 40 rats (N=10 per group) | not provided | NEC signs and symptoms<br><br>vascular function / hypoxia-ischemia / free radical formation                                |
| D'Souza et al. 2010 | Sprague-Dawley rats (newborn), NEC induction with formula feeding (200 µL every three hours) for 4 days                                                                                                                                         | formula without supplementation        | <i>Saccharomyces Boulardii</i> 5 mg/mL in formula, simultaneous with NEC induction<br><br>GOS/FOS in formula, simultaneous with NEC induction<br><br><i>Saccharomyces Boulardii</i> 5 mg/mL and GOS/FOS in formula, simultaneous with NEC induction | unclear                  | not provided | NEC signs and symptoms<br><br>NEC survival,<br><br>vascular function / hypoxia-ischemia / free radical formation           |
| D'Souza et al. 2012 | Sprague-Dawley rats (newborn), NEC induction with formula feeding (200 µL every three hours), hyperoxia (50% O <sub>2</sub> ) with brief periods of hypoxia (12% O <sub>2</sub> for 1-2 minutes) every 4 (day 1), 5 (day 2) or 6 (day 3) hours. | formula without supplementation        | <i>Saccharomyces Boulardii</i> in formula, simultaneous with NEC induction<br><br>GOS/FOS in formula, simultaneous with NEC induction<br><br><i>Saccharomyces Boulardii</i> and GOS/FOS in formula, simultaneous with NEC induction                 | unclear                  | not provided | NEC signs and symptoms<br><br>intestinal inflammation<br><br>vascular function / hypoxia-ischemia / free radical formation |



|                       |                                                                                                                                                                                                                                                          |                                                                   |                                                                                                                                                                                                                                                                                            |                                    |                 |                                                                                                                |
|-----------------------|----------------------------------------------------------------------------------------------------------------------------------------------------------------------------------------------------------------------------------------------------------|-------------------------------------------------------------------|--------------------------------------------------------------------------------------------------------------------------------------------------------------------------------------------------------------------------------------------------------------------------------------------|------------------------------------|-----------------|----------------------------------------------------------------------------------------------------------------|
| Dvorak et al.<br>2002 | Sprague-Dawley rats (newborn),<br>NEC induction with formula<br>feeding and asphyxia (100% N <sub>2</sub><br>for 1 minute) followed by cold<br>exposure (4°C for 10 minutes)<br>twice daily for 4 days                                                   | control cow-<br>milk based<br>formula (free of<br>growth factors) | rat EGF in cow-milk based formula,<br>500 ng/mL, simultaneous with NEC<br>induction                                                                                                                                                                                                        | 60 rats                            | not<br>provided | histological NEC<br>incidence/severity<br><br>NEC signs and<br>symptoms                                        |
| Dvorak et al.<br>2008 | Sprague-Dawley rats (newborn,<br>1 day before scheduled birth),<br>NEC induction with formula<br>feeding and asphyxia (100% N <sub>2</sub><br>for 1 minute) and cold exposure<br>(4°C for 10 minutes) twice daily<br>for 4 days                          | control cow-<br>milk based<br>formula (free of<br>growth factors) | human HB-EGF in cow-milk based<br>formula, 5, 50, 500 or 1000 ng/mL,<br>simultaneous with NEC induction<br><br>rat EGF in cow-milk based formula,<br>500 ng/mL, simultaneous with NEC<br>induction<br><br>human HB-EGF, 500 ng/mL, and<br>rat EGF, 500 ng/mL, in cow-milk<br>based formula | 103 rats<br>(N=15-24 per<br>group) | not<br>provided | histological NEC<br>incidence/severity<br><br>intestinal barrier<br><br>intestinal<br>epithelial cell<br>death |
| Egan et al.<br>2016   | C57BL/6 mice (7-8 days old),<br>NEC induction with<br>administration of enteric<br>bacteria isolated from an infant<br>with NEC (12.5 µL stool slurry<br>in 1 mL formula), formula<br>feeding and hypoxia (5% O <sub>2</sub> )<br>twice daily for 4 days | no ATRA                                                           | ATRA, dissolved in 1:1 DMSO and<br>corn oil, 6 mg/mL and 50<br>µg/mouse, once daily by gavage,<br>simultaneous with NEC induction                                                                                                                                                          | unclear                            | not<br>provided | histological NEC<br>incidence/severity<br><br>intestinal<br>inflammation                                       |
| Ergün et al.<br>2007  | Wistar rats (newborn), NEC<br>induction with formula feeding<br>twice daily and hypoxia (5% O <sub>2</sub> ,<br>95% N <sub>2</sub> ), thrice daily for 3 days                                                                                            | formula without<br>resveratrol                                    | resveratrol in formula, 15 mg/kg in<br>every feed, simultaneous with NEC<br>induction                                                                                                                                                                                                      | 27 rats (N=7-<br>10 per<br>group)  | not<br>provided | histological NEC<br>incidence/severity<br><br>NEC signs and<br>symptoms<br><br>vascular function<br>/ hypoxia- |

|                  |                                                                                                                                                                                                                                              |                                                           |                                                                                                                                      |                          |              |                                                               |
|------------------|----------------------------------------------------------------------------------------------------------------------------------------------------------------------------------------------------------------------------------------------|-----------------------------------------------------------|--------------------------------------------------------------------------------------------------------------------------------------|--------------------------|--------------|---------------------------------------------------------------|
|                  |                                                                                                                                                                                                                                              |                                                           |                                                                                                                                      |                          |              | ischemia / free radical formation                             |
| Fan et al. 2019  | Sprague-Dawley rats (3-5 days old), NEC induction with <i>Cronobacter sakazakii</i> 1x 10 <sup>9</sup> CFU once per day, formula feeding (200 µL twice daily) and hypoxia (5% O <sub>2</sub> and 95% N <sub>2</sub> thrice daily) for 2 days | formula without <i>Bacteroides fragilis</i> strain ZY-312 | <i>Bacteroides fragilis</i> strain ZY-312, 1x 10 <sup>9</sup> CFU in 200 µL formula, once daily starting 2 days before NEC induction | 40 rats (N=10 per group) | not provided | histological NEC incidence/severity                           |
|                  |                                                                                                                                                                                                                                              |                                                           |                                                                                                                                      |                          |              | NEC signs and symptoms                                        |
|                  |                                                                                                                                                                                                                                              |                                                           |                                                                                                                                      |                          |              | NEC survival                                                  |
|                  |                                                                                                                                                                                                                                              |                                                           |                                                                                                                                      |                          |              | intestinal inflammation                                       |
|                  |                                                                                                                                                                                                                                              |                                                           |                                                                                                                                      |                          |              | systemic inflammation                                         |
|                  |                                                                                                                                                                                                                                              |                                                           |                                                                                                                                      |                          |              | intestinal barrier function                                   |
|                  |                                                                                                                                                                                                                                              |                                                           |                                                                                                                                      |                          |              | vascular function / hypoxia-ischemia / free radical formation |
|                  |                                                                                                                                                                                                                                              |                                                           |                                                                                                                                      |                          |              | intestinal epithelial cell death                              |
| Feng et al. 2005 | Sprague-Dawley rats (newborn), NEC induction with intragastric LPS (2 mg/kg) 8 hours after birth, formula feeding every 4 hours and hypoxia (100% N <sub>2</sub> for 1 minute) followed by cold                                              | no HB-EGF                                                 | HB-EGF, 600 µg/kg, every 4 hours via orogastric feeding tube, simultaneous with NEC induction                                        | unclear                  | not provided | histological NEC incidence/severity                           |
|                  |                                                                                                                                                                                                                                              |                                                           |                                                                                                                                      |                          |              | NEC survival                                                  |

|                                                                   | exposure (10 minutes at 4°C)<br>twice daily for 4 days                                                                                                                                                                                                                                                                                                                 |                           |                                                                                                                   |                                                                                        |                 | intestinal barrier<br>function                                                                    |
|-------------------------------------------------------------------|------------------------------------------------------------------------------------------------------------------------------------------------------------------------------------------------------------------------------------------------------------------------------------------------------------------------------------------------------------------------|---------------------------|-------------------------------------------------------------------------------------------------------------------|----------------------------------------------------------------------------------------|-----------------|---------------------------------------------------------------------------------------------------|
| Feng et al.<br>doi:10.1016/j.j<br>pedsurg.2005<br>.10.018<br>2006 | Sprague-Dawley rats (newborn),<br>NEC induction with intragastric<br>LPS (2 mg/kg) 8 hours after<br>birth, formula feeding (100 µL<br>every 4 hours and increased to<br>400 µL per feed on day 4 if<br>tolerated) and asphyxia (100%<br>N <sub>2</sub> for 1 minute) followed by<br>cold exposure (4 °C for 10<br>minutes) twice daily for 4 days                      | no HB-EGF                 | HB-EGF, 600 µg/kg, every 4 hours<br>via orogastric feeding tube,<br>simultaneous with NEC induction               | 62 rats<br>(N=10-22 per<br>group)                                                      | not<br>provided | histological NEC<br>incidence/severity<br><br>NEC survival,<br><br>intestinal barrier<br>function |
| Feng et al.<br>doi:10.1016/j.j<br>pedsurg.2005<br>.12.020<br>2006 | Sprague-Dawley rats (newborn),<br>NEC induction with intragastric<br>administration of LPS (2 mg/kg)<br>8 hours after birth, formula<br>feeding (100 µL every 4 hours<br>and increased to 400 µL per feed<br>on day 4 if tolerated) and<br>asphyxia (100% N <sub>2</sub> for 1 minute)<br>followed by cold exposure (4 °C<br>for 10 minutes) twice daily for 4<br>days | formula without<br>HB-EGF | HB-EGF in formula, 600 µg/kg,<br>every 4 hours via orogastric feeding<br>tube, simultaneous with NEC<br>induction | 51 rats<br>(N=10-21 per<br>group)                                                      | not<br>provided | histological NEC<br>incidence/severity<br><br>intestinal<br>epithelial cell<br>death              |
| Feng et al.<br>2007                                               | Sprague-Dawley rats (newborn),<br>NEC induction with intragastric<br>administration of LPS (2 mg/kg)<br>8 hours after birth, formula<br>feeding (100 µL every 4 hours<br>and increased to 400 µL per feed<br>on day 4 if tolerated) and<br>asphyxia (100% N <sub>2</sub> for 1 minute)                                                                                 | formula without<br>HB-EGF | HB-EGF in formula, 600 µg/kg,<br>every 4 hours via orogastric feeding<br>tube, simultaneous with NEC<br>induction | 110 rats<br>(dose<br>response<br>experiment)<br><br>9 rats (SEM)<br>(N=3 per<br>group) | not<br>provided | histological NEC<br><br>NEC survival<br><br>intestinal barrier<br>function                        |

|                  |                                                                                                                                                                                                                                                                                                   |                                  |                                                                                                                                                                                                                                                                                                                                                                                                                   |                                                                           |              |                                                                                                                                                                       |
|------------------|---------------------------------------------------------------------------------------------------------------------------------------------------------------------------------------------------------------------------------------------------------------------------------------------------|----------------------------------|-------------------------------------------------------------------------------------------------------------------------------------------------------------------------------------------------------------------------------------------------------------------------------------------------------------------------------------------------------------------------------------------------------------------|---------------------------------------------------------------------------|--------------|-----------------------------------------------------------------------------------------------------------------------------------------------------------------------|
|                  | followed by cold exposure (4 °C for 10 minutes) twice daily for 4 days                                                                                                                                                                                                                            |                                  |                                                                                                                                                                                                                                                                                                                                                                                                                   | 30 rats (migration and proliferation) (N=10 per group)                    |              | intestinal epithelial proliferation                                                                                                                                   |
| Good et al. 2012 | C57BL/6 mice (10 days old), NEC induction with formula feeding (50 µL/g body weight, 5 times a day) and hypoxia (5% O <sub>2</sub> 95% N <sub>2</sub> for 10 minutes) twice daily for 4 days                                                                                                      | no amniotic fluid                | amniotic fluid, 50 µL/g, daily enteral, simultaneous with NEC induction                                                                                                                                                                                                                                                                                                                                           | endotoxemia at least N=3 per group, for histology at least N=10 per group | not provided | histological NEC incidence/severity<br><br>vascular function / hypoxia-ischemia / free radical formation<br><br>intestinal epithelial proliferation                   |
| Good et al. 2014 | C57BL/6 mice (7-10 days old), NEC induction with supplementation of enteric bacteria isolated from an infant with severe NEC (12.5 µL stool slurry in 1 mL formula) in formula feeding (5 times a day) and hypoxia (5% O <sub>2</sub> , 95% N <sub>2</sub> for 10 minutes) twice daily for 4 days | no Lr-DNA, probiotics or CpG-DNA | Lr-DNA (microbial DNA purified from <i>Lactobacillus rhamnosus</i> HN001), 1 mg/kg/day by oral gavage, once daily for 4 days before NEC induction<br><br>live <i>Lactobacillus rhamnosus</i> HN001, 3*10 <sup>11</sup> CFU/kg/day by oral gavage, dose equivalent to 1 mg Lr-DNA/kg/day, once daily for 4 days before NEC induction<br><br>UV-irradiated <i>Lactobacillus rhamnosus</i> HN001, 3*10 <sup>11</sup> | at least N=10 per group                                                   | not provided | histological NEC incidence/severity<br><br>NEC signs and symptoms<br><br>intestinal inflammation<br><br>vascular function / hypoxia-ischemia / free radical formation |

|                  |                                                                                                                                                                                                                                               |                           |                                                                                                                                                                                                                                                                                                                                                                                                                                                                                                                                        |                        |              |                                                                                                                                               |
|------------------|-----------------------------------------------------------------------------------------------------------------------------------------------------------------------------------------------------------------------------------------------|---------------------------|----------------------------------------------------------------------------------------------------------------------------------------------------------------------------------------------------------------------------------------------------------------------------------------------------------------------------------------------------------------------------------------------------------------------------------------------------------------------------------------------------------------------------------------|------------------------|--------------|-----------------------------------------------------------------------------------------------------------------------------------------------|
|                  |                                                                                                                                                                                                                                               |                           | CFU/kg/day by oral gavage, dose equivalent to 1 mg Lr-DNA/kg/day, once daily for 4 days before NEC induction                                                                                                                                                                                                                                                                                                                                                                                                                           |                        |              |                                                                                                                                               |
|                  |                                                                                                                                                                                                                                               |                           | CpG-DNA, 1 mg/kg/day by oral gavage, once daily for 4 days before NEC induction                                                                                                                                                                                                                                                                                                                                                                                                                                                        |                        |              |                                                                                                                                               |
| Good et al. 2014 | Yorkshire piglets (newborn at day 105-108 of gestation), NEC with supplementation of enteric bacteria isolated from an infant with surgical NEC (12.5 µL stool slurry in 1 mL formula) in formula feeding (15 mL/kg every 3 hours) for 4 days | no Lr-DNA or probiotics   | <p>Lr-DNA (microbial DNA purified from <i>Lactobacillus rhamnosus</i> HN001), 1 mg/kg/day by oral gavage, once daily, simultaneous with NEC induction</p> <p>live <i>Lactobacillus rhamnosus</i> HN001, 3*10<sup>11</sup> CFU/kg/day by oral gavage, dose equivalent to 1 mg Lr-DNA/kg/day, once daily, simultaneous with NEC induction</p> <p>UV-irradiated <i>Lactobacillus rhamnosus</i> HN001, 3*10<sup>11</sup> CFU/kg/day by oral gavage, dose equivalent to 1 mg Lr-DNA/kg/day, once daily, simultaneous with NEC induction</p> | at least N=3 per group | not provided | <p>histological NEC incidence/severity</p> <p>NEC signs and symptoms</p> <p>vascular function / hypoxia-ischemia / free radical formation</p> |
| Good et al. 2016 | C57BL/6 mice (7-10 days old), NEC induction with supplementation of enteric bacteria isolated from an infant with severe NEC (12.5 µL stool slurry in 1 mL formula) in                                                                        | formula without HMO 2'-FL | HMO 2'-FL, 5 mg/mL of formula, 0.25 mg/g, once daily, simultaneous with NEC induction                                                                                                                                                                                                                                                                                                                                                                                                                                                  | unclear                | not provided | <p>histological NEC incidence/severity</p> <p>NEC signs and symptom</p>                                                                       |

|                         |                                                                                                                                                                                                                                                                                                                                                                  |                                            |                                                                                                                                                                                                                                                                        |                             |              |                                                                                                                             |
|-------------------------|------------------------------------------------------------------------------------------------------------------------------------------------------------------------------------------------------------------------------------------------------------------------------------------------------------------------------------------------------------------|--------------------------------------------|------------------------------------------------------------------------------------------------------------------------------------------------------------------------------------------------------------------------------------------------------------------------|-----------------------------|--------------|-----------------------------------------------------------------------------------------------------------------------------|
|                         | formula feeding (5 times a day) and hypoxia (5% O <sub>2</sub> , 95% N <sub>2</sub> for 10 minutes) twice daily for 4 days                                                                                                                                                                                                                                       |                                            |                                                                                                                                                                                                                                                                        |                             |              | intestinal inflammation,<br><br>vascular function / hypoxia-ischemia / free radical formation<br><br>microbiome alterations |
| Gunasekaran et al. 2019 | Crl:CD1(ICR) mice (14-16 days old), NEC induction with intraperitoneal injection of dithizone (33 mg/kg) diluted in ethanol/ammonium hydroxide, followed by gavage administration of 1x10 <sup>8</sup> CFU <i>Klebsiella pneumoniae</i> /kg (ATCC 10031), end of experiment 16 hours after intraperitoneal injection and 10 hours after bacterial administration | no sodium hyaluronate                      | sodium hyaluronate (35 kDA), 15 mg/kg, once daily for 3 days prior to induction of NEC and 1h prior to bacterial administration<br><br>sodium hyaluronate (35 kDA), 30 mg/kg, once daily for 3 days prior to induction of NEC and 1h prior to bacterial administration | unclear                     | not provided | histological NEC incidence/severity<br><br>NEC survival<br><br>systemic inflammation<br><br>intestinal barrier function     |
| Halpern et al. 2003     | Sprague-Dawley rats (newborn), NEC induction with formula feeding and asphyxia (100% N <sub>2</sub> for 1 minute) followed by cold exposure (4°C for 10 minutes) twice daily for 4 days                                                                                                                                                                          | rat milk substitute without growth factors | EGF in growth-factor-free rat milk substitute, 500 ng/mL, simultaneous with NEC induction                                                                                                                                                                              | 50 rats (N=15-18 per group) | not provided | histological NEC incidence/severity<br><br>intestinal inflammation                                                          |
| He-Yang et al. 2020     | Sprague-Dawley rats (newborn), NEC induction with formula feeding and hypoxia (5% O <sub>2</sub> , 95% N <sub>2</sub> for 10 minutes) and cold                                                                                                                                                                                                                   | formula without sialylated HMO             | sialylated HMO (39.5% 6'-SL, 28.5% 3'-SL and 6.6% DSLNT) in formula, 1500 mg/L, simultaneous with NEC induction                                                                                                                                                        | 38 rats (N=8-15 per group)  | not provided | histological NEC incidence/severity<br><br>intestinal inflammation                                                          |

|                      |                                                                                                                                                                                                                                                                                                                                                             |                                                                                    |                                                                                                                                           |                                                                             |              |                                                                                                                                                                             |
|----------------------|-------------------------------------------------------------------------------------------------------------------------------------------------------------------------------------------------------------------------------------------------------------------------------------------------------------------------------------------------------------|------------------------------------------------------------------------------------|-------------------------------------------------------------------------------------------------------------------------------------------|-----------------------------------------------------------------------------|--------------|-----------------------------------------------------------------------------------------------------------------------------------------------------------------------------|
|                      | exposure (4 °C for 10 minutes)<br>thrice daily for 3 days                                                                                                                                                                                                                                                                                                   |                                                                                    |                                                                                                                                           |                                                                             |              |                                                                                                                                                                             |
| Hoang et al.<br>2018 | C57BL/6 mice (newborn), NEC induction with formula feeding (100-200 µL, 4 times a day) and hypoxia (5% O <sub>2</sub> , 95% N <sub>2</sub> for 10 minutes) followed by cold exposure (4 °C for 5 minutes) thrice daily for 4 days                                                                                                                           | formula without bacterial strain                                                   | <i>Lactobacillus reuteri</i> 17938 in formula, 10 <sup>6</sup> CFU/g/day/mouse, simultaneous with NEC induction                           | 59 mice (N=15-23 per group)                                                 | not provided | histological NEC incidence/severity<br><br>intestinal inflammation                                                                                                          |
| Isani et al.<br>2018 | Sprague-Dawley rats (newborn), NEC induction with formula feeding (200 µL, every 8 hours) and hypoxia (5% O <sub>2</sub> , 95% N <sub>2</sub> for 10 minutes) after each feeding for 4 days                                                                                                                                                                 | formula without supplementation or formula supplemented with empty soybean extract | human recombinant EGF from transgenic soybean in formula, 75 µg/kg/day, simultaneous with NEC induction                                   | unclear                                                                     | not provided | histological NEC incidence/severity<br><br>NEC survival, intestinal<br><br>intestinal barrier function<br><br>vascular function / hypoxia-ischemia / free radical formation |
| Jain et al.<br>2014  | Sprague-Dawley rats (newborn at day 21.5 of gestation), NEC induction with formula feeding (200 µL starting 30 minutes after birth and every 4 hours and increased by 50 µL every 12 hours to a maximum of 300 µL) and hypoxia (5% O <sub>2</sub> , 95% N <sub>2</sub> for 1 minute) followed by cold exposure (4 °C for 10 minutes) twice daily for 4 days | formula without added substances<br><br>formula with added BSA, 18 ng in total     | 30% v/v amniotic fluid in formula, simultaneous with NEC induction<br><br>HGF in formula, 18 ng in total, simultaneous with NEC induction | amniotic fluid supplementation: 80 rats<br><br>HGF supplementation: 58 rats | not provided | histological NEC incidence/severity<br><br>intestinal inflammation,<br><br>vascular function / hypoxia-ischemia / free radical formation                                    |

|                             |                                                                                                                                                                                    |                     |                                                                                                                                                                                                                                                                                                                                                                                                                                                                                                                                                                                                                                                                                                                                                                                     |                       |              |                                                                                              |
|-----------------------------|------------------------------------------------------------------------------------------------------------------------------------------------------------------------------------|---------------------|-------------------------------------------------------------------------------------------------------------------------------------------------------------------------------------------------------------------------------------------------------------------------------------------------------------------------------------------------------------------------------------------------------------------------------------------------------------------------------------------------------------------------------------------------------------------------------------------------------------------------------------------------------------------------------------------------------------------------------------------------------------------------------------|-----------------------|--------------|----------------------------------------------------------------------------------------------|
| Jantscher-Krenn et al. 2012 | Sprague-Dawley rats (newborn), NEC induction with formula feeding (200 µL twice daily) and hypoxia (5% O <sub>2</sub> , 95% N <sub>2</sub> for 10 minutes) thrice daily for 4 days | formula without HMO | <p>HMO in formula, 10 mg/mL, for the whole study period, simultaneous with NEC induction</p> <p>HMO in formula, 10 mg/mL, after the first 24 hours of NEC induction</p> <p>HMO in formula, 10 mg/mL, for the first 24 hours after NEC induction only, simultaneous with NEC induction</p> <p>formula supplemented with GOS (8 mg/mL), simultaneous with NEC induction</p> <p>neutral HMO-containing (zero sialic acids) formula (10 mg/mL) for the whole study period</p> <p>-1 HMO (one sialic acid) in formula, 10 mg/mL, for the whole study period, simultaneous with NEC induction</p> <p>-2 HMO (two sialic acid) in formula, 10 mg/mL, for the whole study period, simultaneous with NEC induction</p> <p>-3 HMO (three sialic acid) in formula, 10 mg/mL, for the whole</p> | N=8-26 rats per group | not provided | <p>histological NEC incidence/severity</p> <p>NEC signs and symptoms</p> <p>NEC survival</p> |
|-----------------------------|------------------------------------------------------------------------------------------------------------------------------------------------------------------------------------|---------------------|-------------------------------------------------------------------------------------------------------------------------------------------------------------------------------------------------------------------------------------------------------------------------------------------------------------------------------------------------------------------------------------------------------------------------------------------------------------------------------------------------------------------------------------------------------------------------------------------------------------------------------------------------------------------------------------------------------------------------------------------------------------------------------------|-----------------------|--------------|----------------------------------------------------------------------------------------------|



|                                                                    |                                                                                                                                                                                                                                                                                         |                                     |                                                                                                                         |                                   |                 |                                                                                                                                                |
|--------------------------------------------------------------------|-----------------------------------------------------------------------------------------------------------------------------------------------------------------------------------------------------------------------------------------------------------------------------------------|-------------------------------------|-------------------------------------------------------------------------------------------------------------------------|-----------------------------------|-----------------|------------------------------------------------------------------------------------------------------------------------------------------------|
|                                                                    |                                                                                                                                                                                                                                                                                         |                                     | study period, simultaneous with<br>NEC induction                                                                        |                                   |                 |                                                                                                                                                |
|                                                                    |                                                                                                                                                                                                                                                                                         |                                     | -4 HMO (four sialic acid) in<br>formula, 10 mg/mL, for the whole<br>study period, simultaneous with<br>NEC induction    |                                   |                 |                                                                                                                                                |
|                                                                    |                                                                                                                                                                                                                                                                                         |                                     | DSLNT in formula, 300 µM,<br>simultaneous with NEC induction                                                            |                                   |                 |                                                                                                                                                |
| Jing et al<br>2018                                                 | Sprague-Dawley rats (newborn<br>on day 21 of gestation), NEC<br>induction with oral<br>administration of LPS (4<br>mg/kg/day) on postnatal day 0<br>and 1, formula feeding (100 µL<br>twice daily) and asphyxia (100%<br>N <sub>2</sub> for 90 seconds every 4 hours)<br>for 4 days     | formula without<br>berberine        | berberine in formula, 0.6 g/kg/day,<br>simultaneous with NEC induction                                                  | 60 rats (N=10<br>per group)       | not<br>provided | histological NEC<br>incidence/severity<br><br>intestinal<br>inflammation<br><br>systemic<br>inflammation<br><br>intestinal barrier<br>function |
| Khailova et<br>al.<br>doi:<br>10.1152/ajpgi.<br>00141.2009<br>2009 | Sprague-Dawley rats (newborn,<br>1 day before scheduled birth),<br>NEC induction with formula<br>feeding (total volume 850<br>µL/day, 6 times a day) and<br>asphyxia (100% N <sub>2</sub> for 1 minute)<br>followed by cold exposure (4 °C<br>for 10 minutes) twice daily for 4<br>days | formula without<br>bacterial strain | <i>Bifidobacterium bifidum</i> OLB6378 in<br>formula, 5*10 <sup>6</sup> CFU per day,<br>simultaneous with NEC induction | 76 rats<br>(N=16-30 per<br>group) | not<br>provided | histological NEC<br>incidence/severity<br><br>intestinal<br>inflammation,<br><br>intestinal barrier<br>function                                |
| Khailova et<br>al.                                                 | Sprague-Dawley rats (newborn,<br>1 day before scheduled birth),<br>NEC induction with formula                                                                                                                                                                                           | formula without<br>rat EGF          | rat EGF in formula, 500 ng/mL,<br>simultaneous with NEC induction                                                       | 82 rats<br>(N=22-36 per<br>group) | not<br>provided | histological NEC<br>incidence/severity                                                                                                         |

|                                                      |                                                                                                                                                                                                                                                                                         |                                                                           |                                                                                                                                           |                                                                                           |                 |                                                                                                                                               |
|------------------------------------------------------|-----------------------------------------------------------------------------------------------------------------------------------------------------------------------------------------------------------------------------------------------------------------------------------------|---------------------------------------------------------------------------|-------------------------------------------------------------------------------------------------------------------------------------------|-------------------------------------------------------------------------------------------|-----------------|-----------------------------------------------------------------------------------------------------------------------------------------------|
| doi:<br>10.1203/PDR.<br>0b013e3181a<br>a3198<br>2009 | feeding (total volume 850<br>μL/day) and asphyxia (100% N <sub>2</sub><br>for 1 minute) followed by cold<br>exposure (4 °C for 10 minutes)<br>twice daily for 4 days                                                                                                                    |                                                                           |                                                                                                                                           |                                                                                           |                 |                                                                                                                                               |
| Khailova et<br>al.<br>2010                           | Sprague-Dawley rats (newborn,<br>1 day before scheduled birth),<br>NEC induction with formula<br>feeding (total volume 850<br>μL/day, 6 times a day) and<br>asphyxia (100% N <sub>2</sub> for 1 minute)<br>followed by cold exposure (4 °C<br>for 10 minutes) twice daily for 4<br>days | Formula<br>without<br><i>Bifidobacterium<br/>bifidum</i> stain<br>OLB5378 | <i>Bifidobacterium bifidum</i> strain<br>OLB6378, 5*10 <sup>6</sup> CFU/mL per day in<br>two feedings, simultaneous with<br>NEC induction | 76 rats<br>(N=16-30 per<br>group)<br><br>for celecoxib<br>experiments<br>N=8 per<br>group | not<br>provided | histological NEC<br>incidence/severity<br><br>intestinal<br>epithelial cell<br>death                                                          |
| Li et al.<br>2019                                    | C57BL/6 mice (5-9 days old),<br>NEC induction with<br>enteral administration of LPS (4<br>mg/kg/day) on postnatal day 6<br>and 7, formula feeding (50 μL/g,<br>thrice daily) and hypoxia (5% O <sub>2</sub><br>for 10 minutes) thrice daily for 4<br>days                               | formula without<br>bovine milk<br>exosomes                                | bovine milk exosomes in formula, 1<br>μL/μL, simultaneous with NEC<br>induction                                                           | 27 mice (N=9<br>per group)                                                                | not<br>provided | histological NEC<br>incidence/severity<br><br>intestinal<br>inflammation,<br><br>intestinal barrier<br>function                               |
| Li et al.<br>2020                                    | C57BL/6 mice (5-9 days old),<br>NEC induction with<br>enteral administration of LPS (4<br>mg/kg/day) on postnatal day 6<br>and 7, formula feeding (50 μL/g,<br>thrice daily) and hypoxia (5% O <sub>2</sub><br>for 10 minutes) thrice daily for 4<br>days                               | formula without<br>HMO                                                    | HMO in formula, 20 mg/ml, 2%<br>w/v, 2-3 mg HMO/g body<br>weight/day, simultaneous with<br>NEC induction                                  | N=6-15 per<br>group                                                                       | not<br>provided | histological NEC<br>incidence/severity<br><br>intestinal barrier<br>function<br><br>intestinal<br>epithelial cell<br>death /<br>proliferation |

|                    |                                                                                                                                                                                                                                                             |                                     |                                                                                                                                                                                                                                                                                  |                                    |                 |                                                                                                                           |
|--------------------|-------------------------------------------------------------------------------------------------------------------------------------------------------------------------------------------------------------------------------------------------------------|-------------------------------------|----------------------------------------------------------------------------------------------------------------------------------------------------------------------------------------------------------------------------------------------------------------------------------|------------------------------------|-----------------|---------------------------------------------------------------------------------------------------------------------------|
| Liu et al.<br>2012 | Sprague-Dawley rats (newborn),<br>NEC induction with formula<br>feeding (100-200 $\mu$ L four times<br>daily) and hypoxia (5% O <sub>2</sub> , 95%<br>N <sub>2</sub> for 10 minutes) thrice daily<br>for 3 days                                             | formula without<br>bacterial strain | <i>Lactobacillus reuteri</i> DSM<br>17938 in formula, 10 <sup>6</sup> CFU/g body<br>weight/day, simultaneous with<br>NEC induction<br><br><i>Lactobacillus reuteri</i> ATCC PTA 4659<br>in formula, 10 <sup>6</sup> CFU/g body<br>weight/day, simultaneous with<br>NEC induction | 190 rats<br>(N=17-46 per<br>group) | not<br>provided | histological NEC<br>incidence/severity<br><br>NEC survival<br><br>intestinal<br>inflammation                              |
| Liu et al.<br>2013 | Sprague-Dawley rats (newborn),<br>NEC induction with formula<br>feeding (100-200 $\mu$ L 5 times<br>daily) and hypoxia (5% O <sub>2</sub> , 95%<br>N <sub>2</sub> for 10 minutes) thrice daily<br>for 3 days                                                | formula without<br>bacterial strain | <i>Lactobacillus reuteri</i> DSM<br>17938 in formula, 10 <sup>6</sup> CFU/g body<br>weight/day, simultaneous with<br>NEC induction                                                                                                                                               | 59 rats<br>(N=15-22 per<br>group)  | not<br>provided | NEC survival,<br><br>intestinal<br>inflammation                                                                           |
| Liu et al.<br>2014 | C57BL/6 mice (8-10 days old),<br>NEC induction with formula<br>feeding (200 $\mu$ L four times<br>daily) and hypoxia (5% O <sub>2</sub> , 95%<br>N <sub>2</sub> for 10 minutes) followed by<br>cold exposure (4 °C for 5<br>minutes) twice daily for 4 days | formula without<br>bacterial strain | <i>Lactobacillus reuteri</i> DSM<br>17938 in formula, 10 <sup>6</sup> CFU/g body<br>weight/day, simultaneous with<br>NEC induction                                                                                                                                               | 95 mice<br>(N=16-36 per<br>group)  | not<br>provided | histological NEC<br>incidence/severity<br><br>NEC survival<br><br>intestinal<br>inflammation                              |
| Liu et al.<br>2019 | C57BL/6 mice (5-9 days old),<br>NEC induction with<br>administration of LPS, formula<br>feeding and hypoxia for 4 days                                                                                                                                      | no recombinant<br>lactoferrin       | recombinant lactoferrin, 0.3<br>g/kg/day, 6g/L, once daily by<br>gavage from postnatal day 6 to 8                                                                                                                                                                                | 24 mice<br>(N=7-9 per<br>group)    | not<br>provided | histological NEC<br>incidence/severity<br><br>intestinal<br>inflammation<br><br>intestinal<br>epithelial<br>proliferation |

|                                         |                                                                                                                                                                                                                                                                                                                                                                                                                     |                                                 |                                                                                                                                                                                                                                                                                                                                             |                              |                                                                                                                                                     |                                                                        |
|-----------------------------------------|---------------------------------------------------------------------------------------------------------------------------------------------------------------------------------------------------------------------------------------------------------------------------------------------------------------------------------------------------------------------------------------------------------------------|-------------------------------------------------|---------------------------------------------------------------------------------------------------------------------------------------------------------------------------------------------------------------------------------------------------------------------------------------------------------------------------------------------|------------------------------|-----------------------------------------------------------------------------------------------------------------------------------------------------|------------------------------------------------------------------------|
| Lock et al.<br>2020                     | Sprague-Dawley rats (newborn, 1 day before scheduled birth), NEC induction with $10^7$ CFU of both <i>Serratia marcescens</i> , <i>Klebsiella pneumonia</i> and <i>Streptococcus viridans</i> in formula once daily, formula feeding (100 $\mu$ L every 3 hours and increased to 250 $\mu$ L over 5 days if tolerated) and hypoxia (5% O <sub>2</sub> , 95% N <sub>2</sub> for 10 minutes) every 8 hours for 5 days | formula without supplementation                 | egg white lysozyme in formula, 0.37 mg in 100 $\mu$ L, 0.82 mg in 250 $\mu$ L, simultaneous with NEC induction<br><br>DHA in formula, 0.27 $\mu$ L in 100 $\mu$ L, 0.63 $\mu$ L in 250 $\mu$ L, simultaneous with NEC induction                                                                                                             | 60 rats (N=15-30 per group)  | not provided                                                                                                                                        | NEC survival, intestinal barrier function                              |
| Lu et al.<br>2007                       | Sprague-Dawley rats (newborn on day 21 of gestation), NEC induction with formula feeding (100 $\mu$ L every 3 hours and increased to 300 $\mu$ L every 3 hours over 3 days) and asphyxia (100% N <sub>2</sub> for 50 seconds twice daily) for 3 days                                                                                                                                                                | formula without long-chain PUFA supplementation | AA and DHA in formula, AA 0.7% of total fatty acids, DHA 0.5% of total fatty acids, simultaneous with NEC induction<br><br>egg phospholipids in formula, 0.7% AA of total fatty acids, 0.5% DHA of total fatty acids, simultaneous with NEC induction<br><br>DHA in formula, 0.5% DHA of total fatty acids, simultaneous with NEC induction | 352 rats (N=85-90 per group) | Yes, power calculation based on estimated NEC incidence (60%), estimated effect size of 50%, $\alpha$ 0.05 and $\beta$ 0.8; required sample size 90 | histological NEC incidence/severity<br><br>intestinal inflammation     |
| Lu et al.<br>article in Chinese<br>2018 | Sprague-Dawley rats (newborn on day 21 of gestation), NEC induction with formula feeding (100 $\mu$ L every 4 hours and increased to 300 $\mu$ L every 3                                                                                                                                                                                                                                                            | formula without <i>Bifidobacterium</i> mixture  | <i>Bifidobacterium</i> mixture ( <i>Bifidobacterium adolescentis</i> , <i>Bifidobacterium breve</i> and <i>Bifidobacterium bidifum</i> ) in formula, $1.5 \times 10^{10}$ CFU/ml, via gastric tube,                                                                                                                                         | 40 rats (N=10 per group)     | not provided                                                                                                                                        | histological NEC incidence/severity<br><br>intestinal barrier function |

|                        |                                                                                                                                                                                                                                       |                             |                                                                                        |                             |              |                                                                                                                                                                                                                                |
|------------------------|---------------------------------------------------------------------------------------------------------------------------------------------------------------------------------------------------------------------------------------|-----------------------------|----------------------------------------------------------------------------------------|-----------------------------|--------------|--------------------------------------------------------------------------------------------------------------------------------------------------------------------------------------------------------------------------------|
|                        | hours over 3 days), hypoxia (<1% O <sub>2</sub> for 1 minute) followed by cold exposure (4 °C for 10 minutes) twice daily for 4 days                                                                                                  |                             | once a day after cold exposure, simultaneous with NEC induction                        |                             |              |                                                                                                                                                                                                                                |
| Lyu et al. 2020        | C57BL/6 mice (5-6 weeks old), NEC induction with formula feeding and hypoxia (5% O <sub>2</sub> , 95% N <sub>2</sub> for 1 minute) followed by cold exposure (4 °C for 10 minutes) within 1 hour after feeding twice daily for 4 days | saline by gavage            | vitamin D by gavage, 0.5 g/kg/day, simultaneous with NEC induction                     | 32 mice (N=8 per group)     | not provided | histological NEC incidence/severity<br><br>NEC signs and symptoms<br><br>intestinal inflammation,<br><br>vascular function / hypoxia-ischemia / free radical formation<br><br>intestinal epithelial cell death / proliferation |
| Maheshwari et al. 2011 | Swiss-Webster mice (10-13 days old), NEC induction with formula feeding (200 µL/5 g body weight every 3 hours) and hypoxia (5% O <sub>2</sub> for 2 minutes twice daily before feedings) for 4 days                                   | no enteral TGF-β2           | TGF-β2, 100 ng, single dose in the morning for 4 days, simultaneous with NEC induction | 36 rats (N=18 per group)    | Not provided | histological NEC incidence/severity                                                                                                                                                                                            |
| Matheson et al. 2014   | Sprague-Dawley rats (newborn, 12 hours before scheduled birth), NEC induction with one                                                                                                                                                | formula without rat relaxin | rat relaxin in formula, 0.25 ng/0.1 mL in all feeds, simultaneous with NEC induction   | 48 rats (N=11-13 per group) | not provided | histological NEC incidence/severity                                                                                                                                                                                            |

|                     |                                                                                                                                                                                                                                                                                                       |                                                                                                       |                                                                                                                                                                                                                                    |                             |              |                                                                                                        |
|---------------------|-------------------------------------------------------------------------------------------------------------------------------------------------------------------------------------------------------------------------------------------------------------------------------------------------------|-------------------------------------------------------------------------------------------------------|------------------------------------------------------------------------------------------------------------------------------------------------------------------------------------------------------------------------------------|-----------------------------|--------------|--------------------------------------------------------------------------------------------------------|
|                     | time gastric administration of LPS (2 mg/kg), formula feeding (starting 100 µL per feed, increased to 150 µL per feed at 24 hours and to 200 µL per feed at 48 hours, every 4-5 hours) and asphyxia (100% N <sub>2</sub> for 1 minute) and cold exposure (4 °C for 10 minutes) twice daily for 2 days |                                                                                                       |                                                                                                                                                                                                                                    |                             |              | NEC signs and symptoms<br><br>vascular function / hypoxia-ischemia / free radical formation            |
| Maynard et al. 2010 | Sprague-Dawley rats (newborn, 1 day before scheduled birth), NEC induction with formula feeding (total volume 850 µL/day, 6 times a day) and asphyxia (100% N <sub>2</sub> for 1 minute) and cold exposure (4 °C for 10 minutes) twice daily for 4 days                                               | control cow-milk based formula                                                                        | rat EGF in cow-milk based formula, 500 ng/mL, simultaneous with NEC induction                                                                                                                                                      | 60 rats (N=24-36 per group) | not provided | intestinal epithelial cell death                                                                       |
| Miyake et al. 2019  | C57BL/6 mice (5 days old), NEC induction with enteral administration of LPS (4 mg/kg/day), formula feeding (50 µL/g, thrice daily) and hypoxia (5% O <sub>2</sub> for 10 minutes, thrice daily) for 4 days                                                                                            | formula without human breast milk exosomes                                                            | human breast milk exosomes from raw milk in formula, simultaneous with NEC induction<br><br>human breast milk exosomes from pasteurized milk in formula, simultaneous with NEC induction                                           | unclear                     | not provided | histological NEC incidence/severity<br><br>intestinal inflammation,<br><br>intestinal barrier function |
| Møller et al. 2011  | Preterm pigs (92% of gestational age, delivered by caesarian section), NEC induction with parenteral nutrition for the first 2 postnatal days (starting 4 ml/kg/h, after 12h 6 ml/kg/h) and enteral nutrition after 2 days with an oral bolus of 15                                                   | deionized water (control for minimal enteral nutrition)<br><br>control formula without supplementatio | bovine OPN, 2.22 g/L, minimal enteral dose of 5 mg/kg body weight pure OPN in sterile deionized water per 3 hours during parenteral nutrition and 2.2 g/L OPN in formula during full enteral nutrition, simultaneous NEC induction | 47 pigs (N=5-13 per group)  | not provided | histological NEC incidence/severity<br><br>digestion and absorption                                    |

|                    |                                                                                                                                                                                                                                                                                                                                                                                                      |                                                       |                                                                                                                                             |                             |              |                                                                                                                                        |
|--------------------|------------------------------------------------------------------------------------------------------------------------------------------------------------------------------------------------------------------------------------------------------------------------------------------------------------------------------------------------------------------------------------------------------|-------------------------------------------------------|---------------------------------------------------------------------------------------------------------------------------------------------|-----------------------------|--------------|----------------------------------------------------------------------------------------------------------------------------------------|
|                    | ml/kg formula every 3 hours for 1.5 day                                                                                                                                                                                                                                                                                                                                                              | n of OPN, gangliosides or SL                          | gangliosides enriched bovine milk fraction in formula, 3 g/L resulting in 0.06 g/L gangliosides, simultaneous with start of enteral feeding |                             |              |                                                                                                                                        |
|                    |                                                                                                                                                                                                                                                                                                                                                                                                      |                                                       | SL enriched bovine milk fraction in formula, 60 g/L resulting in 8.7 g/L SL, simultaneous with start of enteral feeding                     |                             |              |                                                                                                                                        |
| Nguyen et al. 2014 | Preterm pigs (92% of gestational age, delivered by caesarian section), NEC induction with parenteral nutrition for the first 2 postnatal days (starting 4 ml/kg/h on day 1, 6 ml/kg/h on day 2) with minimal enteral feeding (3 mL/kg per 3 hours on day 1 and 5 mL/kg per 3 hours on day 2) and full enteral nutrition after 2 days with an oral bolus of 15 ml/kg formula every 3 hours for 2 days | formula without supplementation of bovine lactoferrin | bovine lactoferrin in formula, 10 g/L, during minimal enteral feeding and full enteral feeding, simultaneous with NEC induction             | 28 pigs (N=13-15 per group) | not provided | histological NEC incidence/severity<br><br>intestinal inflammation,<br><br>intestinal barrier function<br><br>digestion and absorption |
| Nguyen et al. 2016 | Preterm pigs (90-92% of gestational age, delivered by caesarian section), NEC induction with parenteral nutrition for the first 2 postnatal days (starting 4 ml/kg/h on day 1, 6 ml/kg/h on day 2) with minimal enteral feeding (3 mL/kg per 3 hours on day 1 and                                                                                                                                    | formula without supplementation of bovine lactoferrin | bovine lactoferrin in formula, 10 g/L, during minimal enteral feeding and full enteral feeding, simultaneous with NEC induction             | 28 pigs (N=13-15 per group) | not provided | histological NEC incidence/severity<br><br>intestinal epithelial cell death                                                            |

|                     |                                                                                                                                                                                                                                                                                              |                                     |                                                                                                                                                                                                                                                                                                         |                                                                                       |              |                                                                                                                            |
|---------------------|----------------------------------------------------------------------------------------------------------------------------------------------------------------------------------------------------------------------------------------------------------------------------------------------|-------------------------------------|---------------------------------------------------------------------------------------------------------------------------------------------------------------------------------------------------------------------------------------------------------------------------------------------------------|---------------------------------------------------------------------------------------|--------------|----------------------------------------------------------------------------------------------------------------------------|
|                     | 5 mL/kg per 3 hours on day 2) and full enteral nutrition after 2 days with an oral bolus of 15 ml/kg formula every 3 hours for 2 days                                                                                                                                                        |                                     |                                                                                                                                                                                                                                                                                                         |                                                                                       |              |                                                                                                                            |
| Niño et al. 2017    | C57BL/6 mice (7-8 days old), NEC induction with administration of enteric bacteria isolated from an infant with NEC in formula, formula feeding (5 times a day for 4 days) and hypoxia (5% O <sub>2</sub> , 95% N <sub>2</sub> for 10 minutes, twice daily) for 4 days                       | no ATRA                             | ATRA, dissolved in 1:1 DMSO and corn oil, final concentration 6 mg/mL, 50 µg/mouse, administered daily by gavage, simultaneous with NEC induction                                                                                                                                                       | at least N=5 per experimental group                                                   | not provided | histological NEC incidence/severity<br><br>intestinal inflammation<br><br>intestinal epithelial cell death / proliferation |
| Ohtsuka et al. 2011 | Sprague-Dawley rats (newborn on day 20 of gestation), NEC induction with one time orogastric administration of formula (150 µL)                                                                                                                                                              | control maternal diet (soybean oil) | DHA enriched diet of mother, 49% DHA, 51% soybean oil of total fat, from day 7 to 20 of gestation, prior to NEC induction<br><br>EPA enriched diet of mother, 49% EPA, 51% soybean oil of total fat, from day 7 to 20 of gestation, prior to NEC induction                                              | 6 pregnant rats (N=2 per group, resulting in N=20-28 pups per group, 11 control pups) | not provided | histological NEC incidence/severity<br><br>NEC survival<br><br>intestinal inflammation                                     |
| Olson et al. 2016   | Sprague-Dawley rats (newborn on day 21 of gestation), NEC induction with formula feeding (starting 100 µL per feed and advanced to 400 µL on day 4, 5 times a day) and asphyxia (100% N <sub>2</sub> for 90 seconds) followed by cold exposure (4 °C for 10 minutes) thrice daily for 4 days | sterile water                       | <i>Lactobacillus reuteri</i> DSM 20016 in sterile water, 1*10 <sup>8</sup> CFU in 100 µL, once via oral gavage immediately after delivery, simultaneous with NEC induction<br><br><i>Lactobacillus reuteri</i> DSM 20016 grown on unloaded dextranomer microspheres in sterile water, 1*10 <sup>8</sup> | 168 rats (N=10-48 per group)                                                          | not provided | histological NEC incidence/severity<br><br>intestinal barrier function                                                     |



|                   |                                                                                                                                                                                                                                                                                                                                                                  |                     |                                                                                                                                                                                                                                                                                                                                                                                                                                                                                                                                                                                                                                                                                                                                          |                              |              |                                                                                                                                                                |
|-------------------|------------------------------------------------------------------------------------------------------------------------------------------------------------------------------------------------------------------------------------------------------------------------------------------------------------------------------------------------------------------|---------------------|------------------------------------------------------------------------------------------------------------------------------------------------------------------------------------------------------------------------------------------------------------------------------------------------------------------------------------------------------------------------------------------------------------------------------------------------------------------------------------------------------------------------------------------------------------------------------------------------------------------------------------------------------------------------------------------------------------------------------------------|------------------------------|--------------|----------------------------------------------------------------------------------------------------------------------------------------------------------------|
|                   |                                                                                                                                                                                                                                                                                                                                                                  |                     | CFU in 100 $\mu$ L, once via oral gavage immediately after delivery, simultaneous with NEC induction                                                                                                                                                                                                                                                                                                                                                                                                                                                                                                                                                                                                                                     |                              |              |                                                                                                                                                                |
|                   |                                                                                                                                                                                                                                                                                                                                                                  |                     | <i>Lactobacillus reuteri</i> DSM 20016 grown on MRS broth loaded dextranomer microspheres in sterile water, $1 \times 10^8$ CFU in 100 $\mu$ L, once via oral gavage immediately after delivery, simultaneous with NEC induction                                                                                                                                                                                                                                                                                                                                                                                                                                                                                                         |                              |              |                                                                                                                                                                |
| Olson et al. 2018 | Sprague-Dawley rats (newborn on day 20.5 of gestation), NEC induction with one time intragastric administration of LPS (2 mg/kg), formula feeding (starting 100 $\mu$ L per feed and advanced to 400 $\mu$ L on day 4, 5 times a day) and asphyxia (<1.5% O <sub>2</sub> for 90 seconds) followed by cold exposure (4 °C for 10 minutes) thrice daily for 4 days | sterile 0.9% saline | <p><i>Lactobacillus reuteri</i> DSM 20016 in sterile 0.9% saline, <math>2 \times 10^8</math> CFU in 100 <math>\mu</math>L, once via oral gavage immediately after delivery, simultaneous with NEC induction</p> <p><i>Lactobacillus reuteri</i> DSM 20016 grown on unloaded Sephadex microspheres in sterile 0.9% saline, <math>2 \times 10^8</math> CFU in 100 <math>\mu</math>L, once via oral gavage immediately after delivery, simultaneous with NEC induction</p> <p><i>Lactobacillus reuteri</i> DSM 20016 grown on sucrose-loaded dextranomer microspheres in sterile 0.9% saline, <math>2 \times 10^8</math> CFU in 100 <math>\mu</math>L, once via oral gavage immediately after delivery, simultaneous with NEC induction</p> | 279 rats (N=43-50 per group) | not provided | <p>histological NEC incidence/severity</p> <p>NEC survival</p> <p>intestinal inflammation</p> <p>intestinal barrier function</p> <p>microbiome alterations</p> |

|                            |                                                                                                                                                                                                                                                                                                                                                                                                |                                      |                                                                                                                                                                                                                                               |                                                         |              |                                                                                        |
|----------------------------|------------------------------------------------------------------------------------------------------------------------------------------------------------------------------------------------------------------------------------------------------------------------------------------------------------------------------------------------------------------------------------------------|--------------------------------------|-----------------------------------------------------------------------------------------------------------------------------------------------------------------------------------------------------------------------------------------------|---------------------------------------------------------|--------------|----------------------------------------------------------------------------------------|
|                            |                                                                                                                                                                                                                                                                                                                                                                                                |                                      | <i>Lactobacillus reuteri</i> DSM 20016<br>grown on maltose-loaded Sephadex<br>microspheres in sterile 0.9% saline,<br>2*10 <sup>8</sup> CFU in 100 µL, once via oral<br>gavage immediately after delivery,<br>simultaneous with NEC induction |                                                         |              |                                                                                        |
| Pisano et al.<br>2020      | Sprague-Dawley rats (newborn on day 21 of gestation), NEC induction with one time intragastric administration of LPS (2 mg/kg) with the second feed, formula feeding (starting 100 µL per feed and advanced with 100 µL per day to 400 µL on day 4, every 4 hours), hypoxia (<1.5% O <sub>2</sub> for 90 seconds) thrice daily and cold exposure (4 °C for 10 minutes) thrice daily for 4 days | sterile water intraperitoneal        | human breast milk extracellular vesicles in formula, 1*10 <sup>8</sup> with every feed, simultaneous with NEC induction                                                                                                                       | 142 rats (N=13-70 per group)                            | not provided | histological NEC incidence/severity                                                    |
| Quintanilla et al.<br>2014 | Sprague-Dawley rats (newborn), NEC induction with formula feeding (starting 150 µL per feed on day 1, 4 times daily), hypoxia (5% O <sub>2</sub> , 95% N <sub>2</sub> for 10 minutes) thrice daily and cold exposure (4 °C for 10 minutes) thrice daily for 3 days                                                                                                                             | formula without surfactant protein A | surfactant protein A in formula, 5 µg in 600 µL formula, total dose of 5 µg per animal per day                                                                                                                                                | 42 rats (N=6-10 per group)                              | not provided | histological NEC incidence/severity<br><br>NEC survival<br><br>intestinal inflammation |
| Radulescu et al.<br>2009   | Sprague-Dawley rats (newborn on day 21.5 of gestation), NEC induction with one time intragastric administration of LPS (2 mg/kg) 8 hours after birth, formula feeding (starting                                                                                                                                                                                                                | formula without HB-EGF or EGF        | dosing interval experiment: HB-EGF in formula, 800 µg/kg/dose, one / two / three / four or six times a day<br><br><i>Escherichia coli</i> vs <i>Pichia pastoris</i>                                                                           | 203 rats (experiment administration frequency) 199 rats | not provided | histological NEC incidence/severity<br><br>NEC survival                                |

|                         |                                                                                                                                                                                                                          |                                             |                                                                                                                                                                                                                                                                                                                                                                                                                                                                                                                                                                                                                                                                                               |                                                                                                                                              |                                                                                        |                                                                                                         |
|-------------------------|--------------------------------------------------------------------------------------------------------------------------------------------------------------------------------------------------------------------------|---------------------------------------------|-----------------------------------------------------------------------------------------------------------------------------------------------------------------------------------------------------------------------------------------------------------------------------------------------------------------------------------------------------------------------------------------------------------------------------------------------------------------------------------------------------------------------------------------------------------------------------------------------------------------------------------------------------------------------------------------------|----------------------------------------------------------------------------------------------------------------------------------------------|----------------------------------------------------------------------------------------|---------------------------------------------------------------------------------------------------------|
|                         | 100 µL per feed and advanced as tolerated to 400 µL on day 4, every 4 hours), hypoxia (100% N <sub>2</sub> for 1 minute) followed by cold exposure (4 °C for 10 minutes) twice daily for 4 days                          |                                             | <p>derived HB-EGF comparison experiment:</p> <p>HB-EGF derived from <i>Escherichia coli</i> in formula, 600 / 800 or 1000 µg/kg/dose, four or six times a day</p> <p>HB-EGF derived from <i>Pichia pastoris</i> in formula, 600 / 800 or 1000 µg/kg/dose, four or six times a day</p> <p>HB-EGF and EGF comparison experiment:</p> <p>HB-EGF in formula, 800 µg/kg/dose<br/>EGF in formula, 800 µg/kg/dose<br/>EGF in formula, 570 µg/kg/dose (molarity equivalent to HB-EGF 800 µg/kg/dose)</p> <p>prophylactic vs therapeutic HB-EGF administration experiment:</p> <p>HB-EGF in formula, 800 µg/kg/dose, from first feeding 2h after birth or started at 12, 24, 48 or 72h after birth</p> | <p>(dosage experiment)</p> <p>120 rats (comparison HB-EGF and EGF)</p> <p>137 rats (intervention starting directly after birth or later)</p> |                                                                                        |                                                                                                         |
| Ran-Ressler et al. 2011 | Sprague-Dawley rats (newborn, 1 day before scheduled birth), NEC induction with formula feeding (total volume 850 µL/day, 6 times a day) and asphyxia (100% N <sub>2</sub> for 1 minute) followed by cold exposure (4 °C | rat formula without supplementation of BCFA | 20% w/w BCFA mixture in rat formula, 25% iso-14:0, 20% anteiso-15:0, 25% iso-16:0, 8% anteiso-17:0, 10% iso-18:0 and 12% iso-20:0, simultaneous with NEC induction                                                                                                                                                                                                                                                                                                                                                                                                                                                                                                                            | 73 rats (N=15-35 per group)                                                                                                                  | Yes, power calculation based on estimated mean and dispersion for NEC scores, $\alpha$ | <p>histological NEC incidence/severity</p> <p>NEC signs and symptoms</p> <p>intestinal inflammation</p> |

|                       | for 10 minutes) twice daily for 4 days                                                                                                                                                                                                                                                                                                                                                                                                                                                                                                                                                                                                                                                                 |                                                                |                                                                                                                                                                                                                                                                                                                                                                                                                                                                                                               |                              | 0.05 and $\beta$ 80%; required sample size 21 | microbiome alterations                                                                                                                                                                                                                              |
|-----------------------|--------------------------------------------------------------------------------------------------------------------------------------------------------------------------------------------------------------------------------------------------------------------------------------------------------------------------------------------------------------------------------------------------------------------------------------------------------------------------------------------------------------------------------------------------------------------------------------------------------------------------------------------------------------------------------------------------------|----------------------------------------------------------------|---------------------------------------------------------------------------------------------------------------------------------------------------------------------------------------------------------------------------------------------------------------------------------------------------------------------------------------------------------------------------------------------------------------------------------------------------------------------------------------------------------------|------------------------------|-----------------------------------------------|-----------------------------------------------------------------------------------------------------------------------------------------------------------------------------------------------------------------------------------------------------|
| Rasmussen et al. 2017 | <p>Preterm pigs (90-92% of gestational age, delivered by caesarian section), NEC induction with parenteral nutrition for the first 2 postnatal days (4-6 ml/kg/h) with minimal enteral feeding (3 mL/kg per 3 hours) and full enteral nutrition after 2 days with an oral bolus of 15 ml/kg formula every 3 hours for 2 days</p> <p>Preterm pigs (90-92% of gestational age, delivered by caesarian section), NEC induction with parenteral nutrition for the first 7 postnatal days (4-6 ml/kg/h) with minimal enteral feeding with slowly increasing amounts (3-17 mL/kg per 3 hours) and full enteral nutrition after 7 days with an oral bolus of 14-17 ml/kg formula every 3 hours for 4 days</p> | control formula without HMO, but with maltodextrin (45-46 g/L) | <p>4 different HMO in formula, 5.0 g/L in most of the experiments, 10 g/L during 4 days' minimal enteral nutrition of the longer study period (0.16-0.64 g/kg/day during these 4 days), the 4 HMO cover the most abundant HMO in milk and represent the characteristic features of naturally occurring HMO, simultaneous with NEC induction</p> <p>more than 25 different HMO in formula, 7.0 g/L, more than 25 HMO mimicking the naturally occurring HMO in human milk), simultaneous with NEC induction</p> | 112 pigs (N=14-23 per group) | not provided                                  | <p>histological NEC incidence/severity</p> <p>NEC signs and symptoms</p> <p>intestinal inflammation</p> <p>intestinal barrier function</p> <p>intestinal epithelial proliferation</p> <p>microbiome alterations</p> <p>digestion and absorption</p> |
| Ren et al. 2019       | Preterm pigs (89-92% of gestational age, delivered by caesarian section), IA LPS from                                                                                                                                                                                                                                                                                                                                                                                                                                                                                                                                                                                                                  | formula without supplemented OPN or CGMP                       | OPN in formula, 2.2 g/L, simultaneous with NEC induction                                                                                                                                                                                                                                                                                                                                                                                                                                                      | 44 pigs (N=10-12 per group)  | not provided                                  | histological NEC incidence/severity                                                                                                                                                                                                                 |

|                                                                 |                                                                                                                                                                                                                                                                                    |                                  |                                                                                                                                                                                                                              |                        |              |                                                                        |
|-----------------------------------------------------------------|------------------------------------------------------------------------------------------------------------------------------------------------------------------------------------------------------------------------------------------------------------------------------------|----------------------------------|------------------------------------------------------------------------------------------------------------------------------------------------------------------------------------------------------------------------------|------------------------|--------------|------------------------------------------------------------------------|
|                                                                 | E. Coli 055:B5 1 mg in an area close to the mouth at 103 days of gestational age, NEC induction by parenteral nutrition (amount gradually decreasing from 96/ml/kg/day to 48 ml/kg/day) and enteral nutrition (gradually increasing from 24 ml/kg/day to 120 ml/kg/day) for 5 days |                                  | CGMP in formula, 30 g/L, simultaneous with NEC induction                                                                                                                                                                     |                        |              | intestinal inflammation,<br><br>intestinal barrier function            |
| Rentea et al.<br>doi:<br>10.1016/j.jpedsurg.2012.03.018<br>2012 | Sprague-Dawley rats (newborn, 1 day before scheduled birth), NEC induction with enteral administration of LPS (2 mg/kg LPS) per feed, formula feeding and hypoxia (5% O <sub>2</sub> , 95% N <sub>2</sub> for 10 minutes thrice daily) for 4 days                                  | formula without supplemented IAP | IAP in formula, 0.4 U/kg, once daily, simultaneous with NEC induction<br><br>IAP in formula, 4 U/kg, once daily, simultaneous with NEC induction<br><br>IAP in formula, 40 U/kg, once daily, simultaneous with NEC induction | N=10-31 per group      | not provided | histological NEC incidence/severity<br><br>intestinal barrier function |
| Rentea et al.<br>doi:<br>10.1016/j.jss.2012.05.039<br>2012      | Sprague-Dawley rats (newborn, 1 day before scheduled birth), NEC induction with enteral administration of LPS (2 mg/kg LPS) per feed, formula feeding every 4 hours and hypoxia (5% O <sub>2</sub> , 95% N <sub>2</sub> for 10 minutes thrice daily) for 3 days                    | formula without supplemented IAP | IAP in formula, 0.4 U/kg, once daily, simultaneous with NEC induction<br><br>IAP in formula, 4 U/kg, once daily, simultaneous with NEC induction<br><br>IAP in formula, 40 U/kg, once daily, simultaneous with NEC induction | N=7-17 per group       | not provided | systemic inflammation                                                  |
| Rentea et al.<br>2013                                           | Sprague-Dawley rats (newborn, 1 day before scheduled birth), NEC induction with enteral administration of LPS (2 mg/kg LPS) per feed, formula feeding every 4 hours and hypoxia (5%                                                                                                | formula without supplemented IAP | IAP in formula, 0.4 U/kg, once daily, simultaneous with NEC induction<br><br>IAP in formula, 4 U/kg, once daily, simultaneous with NEC induction                                                                             | at least N=7 per group | not provided | intestinal inflammation<br><br>intestinal barrier function             |

|                        | O <sub>2</sub> , 95% N <sub>2</sub> for 10 minutes)<br>thrice daily for 1 day                                                                                                                                                                                                                                                                                                                                                                                                                                                                                                                                                                                                                   |                                                                | IAP in formula, 40 U/kg, once daily,<br>simultaneous with NEC induction                                                                                                                                                                                                                                                                                                                                                                                                                                |                              |              | vascular function<br>/ hypoxia-<br>ischemia / free<br>radical formation |
|------------------------|-------------------------------------------------------------------------------------------------------------------------------------------------------------------------------------------------------------------------------------------------------------------------------------------------------------------------------------------------------------------------------------------------------------------------------------------------------------------------------------------------------------------------------------------------------------------------------------------------------------------------------------------------------------------------------------------------|----------------------------------------------------------------|--------------------------------------------------------------------------------------------------------------------------------------------------------------------------------------------------------------------------------------------------------------------------------------------------------------------------------------------------------------------------------------------------------------------------------------------------------------------------------------------------------|------------------------------|--------------|-------------------------------------------------------------------------|
| Rudloff et al.<br>2019 | Preterm pigs (90-92% of gestational age, delivered by caesarian section), NEC induction with parenteral nutrition for the first 2 postnatal days (4-6 ml/kg/h) with minimal enteral feeding (3 mL/kg per 3 hours) and full enteral nutrition after 2 days with an oral bolus of 15 ml/kg formula every 3 hours for 2 days<br><br>Preterm pigs (90-92% of gestational age, delivered by caesarian section), NEC induction with parenteral nutrition for the first 7 postnatal days (4-6 ml/kg/h) with minimal enteral feeding with slowly increasing amounts (3-17 mL/kg per 3 hours) and full enteral nutrition after 7 days with an oral bolus of 14-17 ml/kg formula every 3 hours for 4 days | control formula without HMO, but with maltodextrin (45-46 g/L) | 4 different HMO in formula, 5.0 g/L in most of the experiments, 10 g/L during 4 days' minimal enteral nutrition of the longer study period (0.16-0.64 g/kg/day during these 4 days), the 4 HMO cover the most abundant HMO in milk and represent the characteristic features of naturally occurring HMO, simultaneous with NEC induction<br><br>more than 25 different HMO in formula, 7.0 g/L, more than 25 HMO mimicking the naturally occurring HMO in human milk), simultaneous with NEC induction | 112 pigs (N=30-44 per group) | not provided | microbiome alterations                                                  |
| Satoh et al.<br>2016   | Sprague-Dawley rats (newborn on day 21 of gestation), NEC induction with formula feeding thrice daily and hypoxia (5% O <sub>2</sub> ,                                                                                                                                                                                                                                                                                                                                                                                                                                                                                                                                                          | formula without <i>Bifidobacterium breve</i> M-16V             | <i>Bifidobacterium breve</i> M-16V in formula, 6*10 <sup>7</sup> CFU per day                                                                                                                                                                                                                                                                                                                                                                                                                           | 60 rats (N=17-23 per group)  | not provided | histological NEC incidence/severity                                     |

|                   |                                                                                                                                                                                                                                                                               |                                          |                                                                                               |                             |              |                                     |                         |                             |                                  |
|-------------------|-------------------------------------------------------------------------------------------------------------------------------------------------------------------------------------------------------------------------------------------------------------------------------|------------------------------------------|-----------------------------------------------------------------------------------------------|-----------------------------|--------------|-------------------------------------|-------------------------|-----------------------------|----------------------------------|
|                   | 95% N <sub>2</sub> for 10 minutes) thrice daily before each feeding for 4 days                                                                                                                                                                                                |                                          |                                                                                               |                             |              | NEC survival                        | intestinal inflammation | intestinal barrier function | intestinal epithelial cell death |
| Shen et al. 2019  | Sprague-Dawley rats (newborn), NEC induction with formula feeding (200 µL every 4 hours on the first day, increasing with 50 µL in the subsequent day) and asphyxia (100% N <sub>2</sub> for 1.5 minute) followed by cold stress (4 °C for 10 minutes) twice daily for 4 days | formula without supplemented lactadherin | lactadherin in formula, 10 ug/g/day, simultaneous with NEC induction                          | 45 rats (N=15 per group)    | not provided | histological NEC incidence/severity | NEC signs and symptoms  | NEC survival                | intestinal barrier function      |
| Sheng et al. 2014 | Sprague-Dawley rats (newborn on day 21.5 of gestation), NEC induction with formula feeding (100 µL every 4h and increased to 300-400 µL if tolerated) and asphyxia (100% N <sub>2</sub> for 60 seconds) followed by cold exposure (4°C for 10 minutes) twice daily for 4 days | saline                                   | human β defensin, 100 µg/kg in 100 µL, daily before asphyxia, simultaneous with NEC induction | 68 rats (N=12-24 per group) | not provided | histological NEC incidence/severity | NEC signs and symptoms  | NEC survival                | intestinal inflammation          |

|                     |                                                                                                                                                                                                                                                                                                                               |                                           |                                                                                                                                                                                                                                                                                                                                                                                                                                    |                              |              |                                                                                                   |
|---------------------|-------------------------------------------------------------------------------------------------------------------------------------------------------------------------------------------------------------------------------------------------------------------------------------------------------------------------------|-------------------------------------------|------------------------------------------------------------------------------------------------------------------------------------------------------------------------------------------------------------------------------------------------------------------------------------------------------------------------------------------------------------------------------------------------------------------------------------|------------------------------|--------------|---------------------------------------------------------------------------------------------------|
|                     |                                                                                                                                                                                                                                                                                                                               |                                           |                                                                                                                                                                                                                                                                                                                                                                                                                                    |                              |              | systemic inflammation                                                                             |
|                     |                                                                                                                                                                                                                                                                                                                               |                                           |                                                                                                                                                                                                                                                                                                                                                                                                                                    |                              |              | intestinal barrier function                                                                       |
| Shiou et al. 2011   | Sprague-Dawley rats (newborn on day 20 of gestation), NEC induction with formula feeding (100 µL every 3 hours, incrementally increased to 250 µL) and hypoxia (5% O <sub>2</sub> , 95% N <sub>2</sub> for 10 minutes, thrice daily) for 5 days                                                                               | formula without supplemented EPO or TGF-β | EPO in formula, 0.1 unit/mL, simultaneous with NEC induction<br><br>TGF-β in formula, 30 ng/ml, simultaneous with NEC induction                                                                                                                                                                                                                                                                                                    | 132 rats (N=20-56 per group) | not provided | histological NEC incidence/severity<br><br>intestinal barrier function                            |
| Shiou et al. 2013   | Sprague-Dawley rats (newborn on day 20 of gestation), NEC induction with 10 <sup>7</sup> CFU of both <i>Serratia marcescens</i> , <i>Klebsiella pneumoniae</i> and <i>Streptococcus viridans</i> , formula feeding every 3 hours and hypoxia (5% O <sub>2</sub> , 95% N <sub>2</sub> for 10 minutes, thrice daily) for 5 days | vehicle                                   | TGF-β1 in formula, 30 ng/ml, simultaneous with NEC induction                                                                                                                                                                                                                                                                                                                                                                       | 116 rats (N=20-48 per group) | not provided | histological NEC incidence/severity<br><br>intestinal inflammation<br><br>systemic inflammation   |
| Siggers et al. 2008 | Preterm pigs (107d of gestational age, delivered by caesarian section), NEC induction with parenteral nutrition for the first 36 postnatal hours (starting 4 ml/kg/h, after 12h 6 ml/kg/h) and full enteral nutrition after 36 hours with an oral bolus of 15 ml/kg formula every 3 hours for 2 days                          | peptone water placebo                     | probiotic mixture in 1% peptone water, <i>Bifidobacterium animalis</i> DSM15954, <i>Lactobacillus acidophilus</i> DSM13241, <i>Lactobacillus casei</i> ATCC55544, <i>Lactobacillus pentosus</i> DSM14025 and <i>Lactobacillus plantarum</i> DSM13367 all strains 10 <sup>9</sup> CFU/gram viable lypophilized bacteria, total concentration of 5*10 <sup>9</sup> CFU/3 mL peptone water, 2 mL/kg birth weight administered every 6 | 28 pigs (N=5-13 per group)   | not provided | histological NEC incidence/severity<br><br>microbiome alterations<br><br>digestion and absorption |



|                     |                                                                                                                                                                                                                                                                                                                                                                                                                                                                                                                                                                                                                                                                                          |                                                                                            | hours during period of parenteral nutrition and every 3 hours during period of enteral nutrition                                                                                                                                                                                                                                    |                            |              |                                                                                                                                                                                                                                     |
|---------------------|------------------------------------------------------------------------------------------------------------------------------------------------------------------------------------------------------------------------------------------------------------------------------------------------------------------------------------------------------------------------------------------------------------------------------------------------------------------------------------------------------------------------------------------------------------------------------------------------------------------------------------------------------------------------------------------|--------------------------------------------------------------------------------------------|-------------------------------------------------------------------------------------------------------------------------------------------------------------------------------------------------------------------------------------------------------------------------------------------------------------------------------------|----------------------------|--------------|-------------------------------------------------------------------------------------------------------------------------------------------------------------------------------------------------------------------------------------|
| Siggers et al. 2013 | Preterm pigs (92% of gestational age, delivered by caesarian section), NEC induction with parenteral nutrition for the first 2 postnatal days (starting 4 ml/kg/h, after 12h 6 ml/kg/h) and full enteral nutrition after 2 days with an oral bolus of 15 ml/kg formula every 3 hours for 2 days<br><br>Preterm pigs (92% of gestational age, delivered by caesarian section), NEC induction with exclusive parenteral nutrition for the first 2 postnatal days (starting 4 ml/kg/h, after 12h 6 ml/kg/h) and declining parenteral feeding and gradually increasing enteral nutrition after 2 days with an oral bolus of formula every 3 hours reaching 15 ml/kg after 9 hours for 2 days | formula without porcine amniotic fluid                                                     | porcine amniotic fluid, 10 ml/kg pure bolus during parenteral nutrition every 3 hours and as water fraction (80%) in 15 ml/kg formula during full enteral nutrition, simultaneous with NEC induction<br><br>porcine amniotic fluid, as water fraction (80%) in 15 ml/kg formula during full enteral nutrition, on postnatal day 3-4 | 30 pigs (N=7-13 per group) | not provided | histological NEC incidence/severity<br><br>NEC signs and symptoms<br><br>intestinal inflammation<br><br>vascular function / hypoxia-ischemia / free radical formation<br><br>microbiome alterations<br><br>digestion and absorption |
| Sodhi et al. 2018   | C57BL/6J mice (7-8 days old), NEC induction with supplementation of enteric bacteria isolated from an infant with severe NEC (12.5 µL stool slurry in 1 mL formula) in                                                                                                                                                                                                                                                                                                                                                                                                                                                                                                                   | control formula, 100% TAG-rich oils; mixture of 39% high oleic safflower oil, 29% soya oil | pre-digested formula, 50% TAG-rich oils; 17.5% soybean NEFA, 20% 2-monoacylglycerol palmitate, 10.3% phospholipid lecithin, 34.8% high oleic safflower oil, 14.8% coconut oil, 135 mg/L DHA, 322                                                                                                                                    | at least N=8 per group     | not provided | histological NEC incidence/severity<br><br>NEC signs and symptoms                                                                                                                                                                   |

|                   |                                                                                                                                                                                                                                                                                                                                   |                                                           |                                                                                                                                                                                                                                                                                                                              |                         |              |                                                                                                                                                                                                                |
|-------------------|-----------------------------------------------------------------------------------------------------------------------------------------------------------------------------------------------------------------------------------------------------------------------------------------------------------------------------------|-----------------------------------------------------------|------------------------------------------------------------------------------------------------------------------------------------------------------------------------------------------------------------------------------------------------------------------------------------------------------------------------------|-------------------------|--------------|----------------------------------------------------------------------------------------------------------------------------------------------------------------------------------------------------------------|
|                   | formula feeding (50 µL/g, 5 times a day) and hypoxia (5% O <sub>2</sub> 95% N <sub>2</sub> for 10 minutes twice daily) for 4 days                                                                                                                                                                                                 | and 27.9% coconut oil; 146 mg/L DHA, 312 mg/L AA acid     | mg/L AA, simultaneous with NEC induction<br><br>very low fat formula, 161 mg/L DHA, 355 mg/L AA, fat replaced by lactose, simultaneous with NEC induction                                                                                                                                                                    |                         |              | intestinal inflammation<br><br>vascular function / hypoxia-ischemia / free radical formation                                                                                                                   |
| Sodhi et al. 2020 | C57BL/6J mice (7-8 days old), NEC induction with supplementation of enteric bacteria isolated from an infant with severe NEC (12.5 µL stool slurry in 1 mL formula) in formula feeding (50 µL/g, 5 times a day) and hypoxia (5% O <sub>2</sub> , 95% N <sub>2</sub> for 10 minutes twice daily) immediately after feed for 4 days | formula without supplemented 2'-FL, 6'-SL, lactose or GOS | 2'-FL in formula, 10 mg/kg, 200 µL/mouse, simultaneous with NEC induction<br><br>6'-SL in formula, 10 mg/kg, 200 µL/mouse, simultaneous with NEC induction<br><br>lactose in formula, 10 mg/kg, 200 µL/mouse, simultaneous with NEC induction<br><br>GOS in formula, 10 mg/kg, 200 µL/mouse, simultaneous with NEC induction | at least N= 5 per group | not provided | histological NEC incidence/severity<br><br>NEC signs and symptoms<br><br>intestinal inflammation<br><br>vascular function / hypoxia-ischemia / free radical formation,<br><br>intestinal epithelial cell death |
| Sodhi et al. 2020 | Yorkshire piglets (~90% gestation, caesarian delivery), NEC with supplementation of enteric bacteria isolated from an infant with surgical NEC (12.5 µL stool slurry in 1 mL formula) in formula feeding (15 mL/kg every 3 hours) for 4 days                                                                                      | formula without supplemented 2'-FL or 6'-SL               | 2'-FL in formula, 10 mg/ml, simultaneous with NEC induction<br><br>6'-SL in formula, 10 mg/ml, simultaneous with NEC induction<br><br>2'-FL + 6'-SL in formula, 5 mg/ml                                                                                                                                                      | at least N= 4 per group | not provided | histological NEC incidence/severity<br><br>NEC signs and symptoms<br><br>intestinal inflammation                                                                                                               |

|                                                  |                                                                                                                                                                                                                                                                                                                        |                           | each, simultaneous with NEC<br>induction                                                                                                                                              |                                    |                 | vascular function<br>/ hypoxia-<br>ischemia / free<br>radical formation,<br><br>intestinal<br>epithelial cell<br>death                                                                   |
|--------------------------------------------------|------------------------------------------------------------------------------------------------------------------------------------------------------------------------------------------------------------------------------------------------------------------------------------------------------------------------|---------------------------|---------------------------------------------------------------------------------------------------------------------------------------------------------------------------------------|------------------------------------|-----------------|------------------------------------------------------------------------------------------------------------------------------------------------------------------------------------------|
| Su et al.<br>2013                                | Friend Virus B-Type mice<br>(newborn on day 18.5 of<br>gestation), NEC induction with<br>formula feeding (30 µL every 3<br>hours and increased to a<br>maximum of 50 µL per feed at<br>day 4) and asphyxia (100% N <sub>2</sub> ,<br>for 1 minute) and cold exposure<br>(4 °C for 10 minutes) once daily<br>for 4 days | formula without<br>HB-EGF | HB-EGF in formula, 800<br>µg/kg/dose, added to each feed,<br>simultaneous with NEC induction                                                                                          | 182 mice<br>(N=15-67 per<br>group) | not<br>provided | histological NEC<br>incidence/severity<br><br>intestinal barrier<br>function<br><br>intestinal<br>epithelial<br>proliferation                                                            |
| Tang et al.<br>2019<br><br>article in<br>Chinese | C57BL/6J mice (10 day old),<br>NEC induction with formula<br>feeding (300~500 µL/g, 5 times a<br>day) and hypoxia (N <sub>2</sub> 12 L/min<br>for 1.5 minute) and cold<br>exposure (4 °C for 10 minutes)<br>thrice daily for 3 days                                                                                    | PBS                       | <i>Lactobacillus reuteri</i> DSM17938, 10 <sup>6</sup><br>CFU/g/day dissolved in PBS at 10 <sup>7</sup><br>CFU/mL, intragastric once every<br>day, simultaneous with NEC<br>induction | 96 mice<br>(N=32 per<br>group)     | not<br>provided | histological NEC<br>incidence/severity<br><br>NEC signs and<br>symptoms<br><br>intestinal<br>inflammation<br><br>vascular function<br>/ hypoxia-<br>ischemia / free<br>radical formation |

|                                                           |                                                                                                                                                                                                                                                                                                          |                                                         |                                                                                                                                                                    |                             |              |                                                                                                                                                                |
|-----------------------------------------------------------|----------------------------------------------------------------------------------------------------------------------------------------------------------------------------------------------------------------------------------------------------------------------------------------------------------|---------------------------------------------------------|--------------------------------------------------------------------------------------------------------------------------------------------------------------------|-----------------------------|--------------|----------------------------------------------------------------------------------------------------------------------------------------------------------------|
| Tian et al.<br>2017                                       | Sprague-Dawley rats (3 days old), NEC induction with formula feeding (150 µL 4 times a day on day 1 and increased 100 µL per feed per day) and hypoxia (100% N <sub>2</sub> for 1.5 minute) followed by cold exposure (4 °C for 10 minutes) thrice daily for 3 days                                      | Formula without supplemented IGF1                       | IGF1 in formula, 22 mg/L, simultaneous with NEC induction                                                                                                          | 60 rats (N=20 per group)    | not provided | histological NEC incidence/severity<br><br>NEC signs and symptoms,<br><br>intestinal inflammation<br><br>intestinal barrier function                           |
| Wang et al.<br>doi:<br>10.1002/mnfr<br>.201900262<br>2019 | C57BL/6 mice (7 days old), NEC induction with enteral LPS (4 mg/kg/day) on postnatal day 7 (part of the animals), formula feeding (100-200 µL every 8 hours) and hypoxia (5% O <sub>2</sub> , 95% N <sub>2</sub> for 10 minutes) followed by cold exposure (4 °C for 10 minutes) thrice daily for 3 days | formula without supplemented HMO                        | HMO in formula, 20 g/L, simultaneous with NEC induction                                                                                                            | 90 mice (N=13-15 per group) | not provided | histological NEC incidence/severity<br><br>NEC survival<br><br>intestinal inflammation<br><br>systemic inflammation<br><br>intestinal epithelial proliferation |
| Wang et al.<br>doi:<br>10.1002/mnfr<br>.201801247<br>2019 | Sprague-Dawley rats (10 days old), NEC induction with formula feeding (50 µL/g body weight 3 times per day) and hypoxia (5% O <sub>2</sub> , 95% N <sub>2</sub> for 5 minutes twice daily) for 4 days                                                                                                    | formula without supplemented human breast milk exosomes | human breast milk exosomes in formula, 200 µg/mL, isolated from lactating mothers who had delivered preterm infants (24-36 weeks), simultaneous with NEC induction | unclear                     | not provided | histological NEC incidence/severity<br><br>intestinal epithelial cell proliferation                                                                            |

|                                                             |                                                                                                                                                                                                                                                                                    |                                              |                                                                                                                                                                              |                              |              |                                                                                                                                                                             |
|-------------------------------------------------------------|------------------------------------------------------------------------------------------------------------------------------------------------------------------------------------------------------------------------------------------------------------------------------------|----------------------------------------------|------------------------------------------------------------------------------------------------------------------------------------------------------------------------------|------------------------------|--------------|-----------------------------------------------------------------------------------------------------------------------------------------------------------------------------|
| Wang et al.<br>2020                                         | C57BL/6 mice (7 days old), NEC induction with formula feeding (100-200 $\mu$ L every 8 hours) and hypoxia (5% O <sub>2</sub> , 95% N <sub>2</sub> for 10 minutes) followed by cold exposure (4 °C for 10 minutes) thrice daily for 3 days                                          | formula without supplemented HMO             | HMO in formula, 5 g/L, simultaneous with NEC induction<br>HMO in formula, 10 g/L, simultaneous with NEC induction<br>HMO in formula, 20 g/L, simultaneous with NEC induction | 70 mice (N=10-15 per group)  | not provided | histological NEC incidence/severity<br><br>NEC survival<br><br>intestinal inflammation<br><br>systemic inflammation<br><br>intestinal epithelial cell death / proliferation |
| Wei et al.<br>doi:10.1038/p<br>r.2015.63<br>2015            | C57BL/6 mice (newborn), NEC induction with formula feeding (300 $\mu$ L every 3 hours on day 1 and increased to a maximum of 500 $\mu$ L per feed on day 4) and asphyxia (100% N <sub>2</sub> for 1 minute) followed by cold exposure (4 °C for 10 minutes) twice daily for 4 days | formula without supplemented HB-EGF          | HB-EGF in formula, 800 $\mu$ g/kg per dose in each feed, simultaneous with NEC induction                                                                                     | 246 mice (N=22-49 per group) | not provided | intestinal barrier function<br><br>enteric nervous system                                                                                                                   |
| Wei et al.<br>doi:<br>10.1016/j.jss.2<br>015.03.023<br>2015 | C57BL/6 mice (newborn), NEC induction with formula feeding and hypoxia (5% O <sub>2</sub> , 95% N <sub>2</sub> for 1 minute) followed by cold exposure (4 °C for 10 minutes) twice daily for 4 days                                                                                | formula without supplemented HB-EGF          | HB-EGF in formula, 800 $\mu$ g/kg per dose in each feed, simultaneous with NEC induction                                                                                     | 92 mice (N=17-48 per group)  | not provided | histological NEC incidence/severity<br><br>intestinal inflammation                                                                                                          |
| Whitehouse<br>et al.<br>2010                                | Sprague-Dawley rats (newborn), NEC induction with formula feeding (200 $\mu$ L thrice daily)                                                                                                                                                                                       | formula without supplemented bovine calf IAP | bovine calf IAP in formula, four glycine units in the morning feed, simultaneous with NEC induction                                                                          | 89 rats (N=13-28 per group)  | not provided | histological NEC incidence/severity                                                                                                                                         |

|                  |                                                                                                                                                                                                                                                                                                                    |                                  |                                                                                                                                                                                                                                                                                                              |                             |              |                                                                                                                      |
|------------------|--------------------------------------------------------------------------------------------------------------------------------------------------------------------------------------------------------------------------------------------------------------------------------------------------------------------|----------------------------------|--------------------------------------------------------------------------------------------------------------------------------------------------------------------------------------------------------------------------------------------------------------------------------------------------------------|-----------------------------|--------------|----------------------------------------------------------------------------------------------------------------------|
|                  | supplemented with LPS (2 mg/kg per feed, all or part of the feeds) and hypoxia (5% O <sub>2</sub> for 10 minutes thrice daily) for 4 days                                                                                                                                                                          |                                  |                                                                                                                                                                                                                                                                                                              |                             |              |                                                                                                                      |
| Wu et al. 2017   | Sprague-Dawley rats (newborn on day 20-21 of gestation), NEC induction with formula feeding (150 µL every 4 hours and increased to a maximum of 200 µL per feed after 1 day if tolerated) and asphyxia (100% N <sub>2</sub> for 1.5 minute) followed by cold exposure (4 °C for 10 minutes) twice daily for 3 days | formula without bacterial strain | <i>Bifidobacterium adolescentis</i> in formula, 1.0*10 <sup>8</sup> per day                                                                                                                                                                                                                                  | 45 rats (N=14-16 per group) | not provided | histological NEC incidence/severity<br><br>NEC signs and symptoms<br><br>NEC survival<br><br>intestinal inflammation |
| Wu et al. 2019   | C57BL/6 mice (5 days old), NEC induction with enteral administration of LPS (4 mg/kg/day) on postnatal day 6-7, formula feeding (50 µL/g, thrice daily) and hypoxia (5% O <sub>2</sub> for 10 minutes, thrice daily) for 5 days                                                                                    | lactose in formula, 2 mg/g/day   | HMO from pooled mature breast milk in formula, 20 mg/mL (2% weight/volume), daily HMO intake 2-3 mg/g body weight, simultaneous with NEC induction<br><br>some experiments rutin hydrate, 0.5 mg/g body weight/day (proteindisulfide isomerase antagonist) added to formula, simultaneous with NEC induction | at least N=6 per group      | not provided | histological NEC incidence/severity<br><br>NEC signs and symptoms<br><br>intestinal barrier function                 |
| Xiao et al. 2018 | C57BL/6J mice (8 days old), NEC induction with formula feeding (every 4 hours) and asphyxia (100% N <sub>2</sub> for 1 minute) followed by cold exposure (4 °C for 10 minutes) twice daily for 3 days                                                                                                              | PBS                              | vitamin A, 20 IU, intragastric once daily from postnatal day 1-7, prior to NEC induction                                                                                                                                                                                                                     | 24 mice (N=12 per group)    | not provided | histological NEC incidence/severity<br><br>intestinal inflammation,<br><br>intestinal barrier function               |

|                   |                                                                                                                                                                                                                                                                                                                                                                                                     |                                  |                                                                                                                               |                              |              | microbiome alterations                                                                                                                                                                                         |
|-------------------|-----------------------------------------------------------------------------------------------------------------------------------------------------------------------------------------------------------------------------------------------------------------------------------------------------------------------------------------------------------------------------------------------------|----------------------------------|-------------------------------------------------------------------------------------------------------------------------------|------------------------------|--------------|----------------------------------------------------------------------------------------------------------------------------------------------------------------------------------------------------------------|
| Xu et al. 2013    | Sprague-Dawley rats (newborn), NEC induction with formula feeding (100 µL every 4 hours and increased if tolerated by 50 µL every 3 feeds to a maximum of 400 µL per feed on day 4) and asphyxia (100% N <sub>2</sub> for 1 minute) followed by cold exposure (4 °C for 10 minutes) twice daily for 4 days                                                                                          | formula without supplemented GD3 | GD3 in formula, 15 µg/mL, simultaneous with NEC induction                                                                     | 90 rats (N=30 per group)     | not provided | histological NEC incidence/severity<br><br>NEC signs and symptoms<br><br>intestinal inflammation                                                                                                               |
| Yakut et al. 2020 | Wister rats (newborn), NEC induction with one time intraperitoneal LPS (1 mg/kg in distilled water from E. coli O111:B4) on the first day, formula feeding (starting 200 µL every 3 hours and daily increased by 100 µL if tolerated) and asphyxia (100 CO <sub>2</sub> for 10 minutes), hyperoxia (97% O <sub>2</sub> for 5 minutes) and cold exposure (4 °C for 5 minutes) twice daily for 3 days | distilled water                  | Foeniculum vulgare extract in distilled water, 200 mg/kg/day, 0.8 ml/kg/day, oral once daily, simultaneous with NEC induction | 42 rats (N=12 per group)     | not provided | histological NEC incidence/severity<br><br>NEC signs and symptoms<br><br>intestinal inflammation,<br><br>vascular function / hypoxia-ischemia / free radical formation<br><br>intestinal epithelial cell death |
| Yang et al. 2012  | Sprague-Dawley rats (newborn on day 21.5 of gestation), NEC induction with formula feeding                                                                                                                                                                                                                                                                                                          | Formula without                  | HB-EGF in formula, 800 µg/kg per dose in each feed, simultaneous with NEC induction                                           | 197 rats (N=10-43 per group) | not provided | histological NEC incidence/severity                                                                                                                                                                            |

|                  |                                                                                                                                                                                                                  |                                                      |                                                                                                                                                                                                                                                                          |                              |              |                                                                         |
|------------------|------------------------------------------------------------------------------------------------------------------------------------------------------------------------------------------------------------------|------------------------------------------------------|--------------------------------------------------------------------------------------------------------------------------------------------------------------------------------------------------------------------------------------------------------------------------|------------------------------|--------------|-------------------------------------------------------------------------|
|                  | (starting 100 µL every 4 hours and increased to a maximum of 400 µL per feed on day 4) and asphyxia (100% N <sub>2</sub> for 1 minute) followed by cold stress (4 °C for 10 minutes) twice daily for 4 days      | supplemented HB-EGF                                  |                                                                                                                                                                                                                                                                          |                              |              | NEC signs and symptoms                                                  |
|                  |                                                                                                                                                                                                                  |                                                      |                                                                                                                                                                                                                                                                          |                              |              | NEC survival                                                            |
|                  |                                                                                                                                                                                                                  |                                                      |                                                                                                                                                                                                                                                                          |                              |              | intestinal barrier function                                             |
| Yang et al. 2020 | Sprague-Dawley rats (2 days old), NEC induction with enteral LPS (5 mg/mL) from day 3 of experiment (5 days old) and formula feeding (starting 200 µL every 4 hours and increased to 300 µL per feed) for 8 days | formula without supplementation of glutamine or MPLs | glutamine in formula, 200 mg/kg, simultaneous with NEC induction<br><br>MPLs in formula, 50 mg/kg, simultaneous with NEC induction<br><br>MPLs in formula, 100 mg/kg, simultaneous with NEC induction<br><br>MPLs in formula, 200 mg/kg, simultaneous with NEC induction | 72 rats (N=12 per group)     | not provided | histological NEC incidence/severity                                     |
|                  |                                                                                                                                                                                                                  |                                                      |                                                                                                                                                                                                                                                                          |                              |              | NEC signs and symptoms                                                  |
|                  |                                                                                                                                                                                                                  |                                                      |                                                                                                                                                                                                                                                                          |                              |              | intestinal inflammation                                                 |
|                  |                                                                                                                                                                                                                  |                                                      |                                                                                                                                                                                                                                                                          |                              |              | intestinal epithelial cell death                                        |
| Yin et al. 2020  | Rats (newborn), NEC induction with hypoxia (5% O <sub>2</sub> for 10 minutes) and hypothermia (8 °C for 10 minutes)                                                                                              | 1% gum acacia solution                               | curcumin dissolved in 1% gum acacia solution, 20 mg/kg (low dose), orally administered<br><br>curcumin dissolved in 1% gum acacia solution, 50 mg/kg (high dose), orally administered                                                                                    | 20 rats                      | not provided | histological NEC incidence/severity<br>intestinal inflammation,         |
|                  |                                                                                                                                                                                                                  |                                                      |                                                                                                                                                                                                                                                                          |                              |              | intestinal epithelial cell death                                        |
| Yu et al. 2009   | Sprague-Dawley rats (newborn on day 21 of gestation), NEC induction with one time intragastric LPS (2 mg/kg) 8 hours after birth, formula feeding (100 µL every 4 hours                                          | formula without supplemented HB-EGF                  | HB-EGF in formula, 800 µg/kg per dose in each feed, simultaneous with NEC induction                                                                                                                                                                                      | 128 rats (N=63-65 per group) | not provided | histological NEC incidence/severity<br><br>vascular function / hypoxia- |



|                |                                                                                                                                                                                                                                                                                                                                                                                                            |                                                              |                                                                                                                                                                                                                                                                                                                                         |                              |              |                                     |
|----------------|------------------------------------------------------------------------------------------------------------------------------------------------------------------------------------------------------------------------------------------------------------------------------------------------------------------------------------------------------------------------------------------------------------|--------------------------------------------------------------|-----------------------------------------------------------------------------------------------------------------------------------------------------------------------------------------------------------------------------------------------------------------------------------------------------------------------------------------|------------------------------|--------------|-------------------------------------|
|                | and increased to a maximum of 400 µL per feed) and asphyxia (100% N <sub>2</sub> , for 1 minute) followed by cold exposure (4 °C for 10 minutes) twice daily for 1,2 or 3 days                                                                                                                                                                                                                             |                                                              |                                                                                                                                                                                                                                                                                                                                         |                              |              | ischemia / free radical formation   |
| Yu et al. 2013 | Sprague-Dawley rats (newborn, 1 day before scheduled birth), NEC induction with 10 <sup>7</sup> CFU of both <i>Serratia marcescens</i> , <i>Klebsiella pneumonia</i> and <i>Streptococcus viridans</i> in 100 µL formula once daily, formula feeding (100 µL every 3 hours, incrementally increased to 250 µL) and hypoxia (5% O <sub>2</sub> , 95% N <sub>2</sub> for 10 minutes thrice daily) for 5 days | Formula without supplemented EPO                             | EPO in formula, 0.1 µg/mL, simultaneous with NEC induction                                                                                                                                                                                                                                                                              | at least N=3 per group       | not provided | intestinal epithelial cell death    |
| Yu et al. 2014 | Sprague-Dawley rats (newborn), NEC induction with formula feeding (200 µL twice daily) and hypoxia (5% O <sub>2</sub> , 95% N <sub>2</sub> for 10 minutes) thrice daily for 4 days                                                                                                                                                                                                                         | formula without added HMO, GOS or synthetic disialyl glycans | <p>HMO in formula, 2 mg/mL, simultaneous with NEC induction</p> <p>GOS in formula, 2 mg/mL, simultaneous with NEC induction</p> <p>DSLNNt (synthetic disialyl glycan) in formula, 300 mg/ml, simultaneous with NEC induction</p> <p>3'''-sLNNt (synthetic monosialyl glycan) in formula, 300 mg/ml, simultaneous with NEC induction</p> | 174 rats (N=11-33 per group) | not provided | histological NEC incidence/severity |

|                   |                                                                                                                                                                                                |                                                                  |                                                                                                                                                                                                                                                                                                                                                                                                                                                                                                                                                                                        |                                   |                 |                                        |
|-------------------|------------------------------------------------------------------------------------------------------------------------------------------------------------------------------------------------|------------------------------------------------------------------|----------------------------------------------------------------------------------------------------------------------------------------------------------------------------------------------------------------------------------------------------------------------------------------------------------------------------------------------------------------------------------------------------------------------------------------------------------------------------------------------------------------------------------------------------------------------------------------|-----------------------------------|-----------------|----------------------------------------|
|                   |                                                                                                                                                                                                |                                                                  | DS'LNT (synthetic disialyl glycan)<br>in formula, 300 mg/ml,<br>simultaneous with NEC induction                                                                                                                                                                                                                                                                                                                                                                                                                                                                                        |                                   |                 |                                        |
|                   |                                                                                                                                                                                                |                                                                  | GD3 (synthetic disialyl glycan) in<br>formula, 300 mg/ml, simultaneous<br>with NEC induction                                                                                                                                                                                                                                                                                                                                                                                                                                                                                           |                                   |                 |                                        |
|                   |                                                                                                                                                                                                |                                                                  | DSLac (synthetic disialyl glycan) in<br>formula, 300 mg/ml, simultaneous<br>with NEC induction                                                                                                                                                                                                                                                                                                                                                                                                                                                                                         |                                   |                 |                                        |
| Yu et al.<br>2017 | Sprague-Dawley rats (newborn),<br>NEC induction with formula<br>feeding (200 µL twice daily) and<br>hypoxia (5% O <sub>2</sub> , 95% N <sub>2</sub> for 10<br>minutes) thrice daily for 4 days | formula without<br>added HMO or<br>synthetic<br>disialyl glycans | HMO in formula, 10 mg/mL,<br>simultaneous with NEC induction<br><br>Neu5Gc-DS'LNT (synthetic disialyl<br>glycan) in formula, 300 µM,<br>simultaneous with NEC induction<br><br>DS'LNnT (synthetic disialyl glycan)<br>in formula, 300 µM, simultaneous<br>with NEC induction<br><br>DSTa (synthetic disialyl glycan) in<br>formula, 300 µM, simultaneous<br>with NEC induction<br><br>DSGalB (synthetic disialyl glycan)<br>in formula, 300 µM, simultaneous<br>with NEC induction<br><br>DSLNnT (synthetic disialyl glycan)<br>in formula, 300 µM, simultaneous<br>with NEC induction | 139 rats<br>(N=9-22 per<br>group) | not<br>provided | histological NEC<br>incidence/severity |

|                      |                                                                                                                                                                                                                                                                                                                                                              |                                                     |                                                                                                                               |                                   |                 |                                                                                                                                                                                                              |
|----------------------|--------------------------------------------------------------------------------------------------------------------------------------------------------------------------------------------------------------------------------------------------------------------------------------------------------------------------------------------------------------|-----------------------------------------------------|-------------------------------------------------------------------------------------------------------------------------------|-----------------------------------|-----------------|--------------------------------------------------------------------------------------------------------------------------------------------------------------------------------------------------------------|
|                      |                                                                                                                                                                                                                                                                                                                                                              |                                                     | DS'LNT (synthetic disialyl glycan)<br>in formula, 300 µM, simultaneous<br>with NEC induction                                  |                                   |                 |                                                                                                                                                                                                              |
| Zhang et al.<br>2019 | Sprague-Dawley rats (newborn),<br>NEC induction with formula<br>feeding (150 µL every 4 hours,<br>incrementally increased to 300-<br>400 µL per feed) and hypoxia<br>(5% O <sub>2</sub> , 95% N <sub>2</sub> for 1.5 minute)<br>followed by cold exposure (4 °C<br>for 10 minutes) twice daily for 4<br>days                                                 | formula without<br>supplemented<br>MFGM             | MFGM in formula, 6 g/L,<br>simultaneous with NEC induction<br><br>MFGM in formula, 12 g/L,<br>simultaneous with NEC induction | 62 rats<br>(N=12-20 per<br>group) | not<br>provided | histological NEC<br>incidence/severity<br><br>NEC signs and<br>symptoms<br><br>NEC survival<br><br>intestinal<br>inflammation<br><br>vascular function<br>/ hypoxia-<br>ischemia / free<br>radical formation |
| Zhou et al.<br>2014  | Sprague-Dawley rats (newborn<br>on day 21 of gestation), NEC<br>induction with formula feeding<br>(starting 150 µL per feed every 4<br>hours, after 24h 200µL per feed),<br>followed by asphyxia (N <sub>2</sub> flow<br>10 L/minute, after reaching 0%<br>O <sub>2</sub> for 1.5 minute) and cold<br>stress (4 °C for 10 minutes) twice<br>daily for 3 days | formula without<br>supplemented<br>glutamine        | glutamine in formula, 0.3g/kg,<br>simultaneous with NEC induction                                                             | 60 rats (N=20<br>per group)       | not<br>provided | histological NEC<br>incidence/severity<br>intestinal<br>inflammation<br><br>intestinal<br>epithelial cell<br>death                                                                                           |
| Zhou et al.<br>2015  | Sprague-Dawley rats (newborn),<br>NEC induction with intragastric<br>LPS (30 mg/kg in sterile water)                                                                                                                                                                                                                                                         | formula without<br>Bifidobacterium<br>microcapsules | Bifidobacterium microcapsules in<br>formula, 1*10 <sup>10</sup> CFU/ml, once daily,<br>simultaneous with NEC induction        | 75 rats (N=15<br>per group)       | not<br>provided | histological NEC<br>incidence/severity                                                                                                                                                                       |

|                  |                                                                                                                                                                                                                                                                                                                  |                                     |                                                                                                   |                          |              |                                                                                                                                      |
|------------------|------------------------------------------------------------------------------------------------------------------------------------------------------------------------------------------------------------------------------------------------------------------------------------------------------------------|-------------------------------------|---------------------------------------------------------------------------------------------------|--------------------------|--------------|--------------------------------------------------------------------------------------------------------------------------------------|
|                  | once daily and formula feeding (starting 100 µL per feed every 4 hours and increased with 50 µL every 12 hours with a maximum of 300 µL per feed) for 3 days                                                                                                                                                     |                                     |                                                                                                   |                          |              | intestinal inflammation                                                                                                              |
| Zhou et al. 2017 | Sprague-Dawley rats (newborn on day 21 of gestation), NEC induction with one time intragastric LPS (2 mg/kg) 8 hours after birth, formula feeding and asphyxia (100% N <sub>2</sub> for 1 minute) followed by cold exposure (4 °C for 10 minutes) twice daily for 4 days                                         | formula without supplemented HB-EGF | HB-EGF in formula, 800 µg/kg per dose in each feed, simultaneous with NEC induction               | at least N=3 per group   | not provided | enteric nervous system alterations                                                                                                   |
| Zhu et al. 2020  | Sprague-Dawley rats (1 day old), NEC induction enteral administration of LPS (10 mg/kg) once daily, formula feeding (400 µL 4 times a day) and hypoxia (N <sub>2</sub> flow 15 L/minute, after reaching 0% O <sub>2</sub> for 1.5 minute) followed by cold exposure (4 °C for 10 minutes) twice daily for 3 days | no fish oil                         | fish oil, 35% DHA and EPA in total, 0.6 mL/100g/day, once daily for 7 days prior to NEC induction | 96 rats (N=32 per group) | not provided | histological NEC incidence/severity<br><br>NEC signs and symptoms<br><br>intestinal inflammation<br>intestinal epithelial cell death |

AA: arachidonic acid; AMP, adenosine monophosphate; ATRA: all-trans retinoic acid; BCFA: branched chain fatty acids; CFU, colony forming units; CGMP: caseinoglycomacropeptide; CMP, Cytidine monophosphate; DHA: docosahexaenoic acid; DMSO, Dimethylsulfoxide; DSGalB, disialyl galactobiose; DSLNT, disialyllacto-N-tetraose; DSLNnT, disialyllacto-N-neotetraose; DS'LNT, a2-6-linked disialyllacto-N-tetraose; DS'LNnT, a2-6-linked disialyllacto-N-neotetraose; DSLac, disialyllactose; DSTa, disialyl T-antigen tetraose; 3'''-sLNnt, 3'''-sialyllacto-N-neotetraose; EGF: epidermal growth factor; EPA: eicosapentaenoic acid; EPO: erythropoietin; 2'-FL: 2'-fucosyllactose; FOS, fructo-oligosaccharides; G-CSF: granulocyte colony-stimulating factor; GD3: ganglioside D3; GMP, guanosine monophosphate; GOS, galacto-oligosaccharides; HB-EGF: hemoglobin-binding EGF-like growth factor; HGF, hepatocyte growth factor; HMO: human milk oligosaccharides; IAP: intestinal alkaline phosphatase; IGF1: insulin-like growth factor 1; IMP, inosine monophosphate; LC-FOS: long chain fructo-oligosaccharides; MFGM: milk fat globule membrane; MPL: milk polar lipids; NEC: necrotizing enterocolitis; NEFA, non-esterified fatty acid; OPN: osteopontin; PAF-AH, platelet activating factor acetylhydrolase; PUFA: polyunsaturated fatty acids; SC-GOS: short chain galacto-oligosaccharides; SL: sialic acids; 6'-SL: 6'-sialyllactose; TAG, Triacylglycerol; TGF-β: transforming growth factor β; UMP, uridine monophosphate;

**Supplementary table S6.** Overview included clinical trials on enteral feeding interventions for prevention of NEC in human infants

| Author and year     | Type of study and sample size       | In- and exclusion criteria                                                                                                                                                                                                                                                                                                        | Control                                                                                                                                                            | Intervention                                                                                                                                                                                       | Sample size / power calculation                                                                                                                                                   | Primary / secondary outcome measures                                                                                                                                                                                                  |
|---------------------|-------------------------------------|-----------------------------------------------------------------------------------------------------------------------------------------------------------------------------------------------------------------------------------------------------------------------------------------------------------------------------------|--------------------------------------------------------------------------------------------------------------------------------------------------------------------|----------------------------------------------------------------------------------------------------------------------------------------------------------------------------------------------------|-----------------------------------------------------------------------------------------------------------------------------------------------------------------------------------|---------------------------------------------------------------------------------------------------------------------------------------------------------------------------------------------------------------------------------------|
| Akin et al. 2014    | single center RCT<br>N=50 neonates  | Inclusion: in hospital born, birth weight <1500 g or gestational age <32 weeks at Ankara University School for Medicine between December 2009 and January 2011<br><br>Exclusion: lack of parental consent, severe congenital anomalies, severe perinatal asphyxia, expiring before allocation to treatment group in the first 72h | 2 mL saline once a day throughout the hospitalization period after the baby reached 20 mL/kg/feeding/day feeding volume (N=25 neonates)                            | bovine lactoferrin, 200 mg/day throughout the hospitalization period after the baby reached 20 mL/kg/feeding/day feeding volume (N=25 neonates)                                                    | not provided                                                                                                                                                                      | Primary outcome(s): tolerability and effectiveness of bovine lactoferrin 200 mg/day in the prevention of nosocomial sepsis, NEC and mortality<br><br>Secondary outcome(s): effect of maturation and bovine lactoferrin on Treg levels |
| Collins et al. 2017 | multi center RCT<br>N=1205 neonates | Inclusion: infants <29 weeks that started on enteral feeding in the previous 3 days at one of 13 centers in Australia, New Zealand and Singapore from June 18th 2012 to September 30th 2015.                                                                                                                                      | soy emulsion emulsified with 1% lecithin and containing 20% total fat and 6% protein<br><br>0.5 mL of the soy emulsion contained 55 mg of linoleic acid, 5.7 mg of | DHA emulsion with a microencapsulated aqueous emulsion of fractionated tuna oil (70% of total oil as DHA in triglyceride form); emulsified 1% lecithin and containing 20% total fat and 6% protein | Yes, power calculation based on estimated absolute effect of 10 percent point and a 19% relative difference in incidence of bronchopulmonary dysplasia, power 90%; $\alpha$ 0.05; | Primary outcome(s): incidence of physiological bronchopulmonary dysplasia<br><br>Secondary outcome(s): secondary respiratory outcomes, retinopathy of prematurity, intraventricular                                                   |

|                         |                                    |                                                                                                                                                                                                                                                                                                     |                                                                                                                                                                                                                                                                              |                                                                                                                                                                                                                                                                                                                     |                                                                                                                                                                                                               |                                                                                                                                                                                                          |
|-------------------------|------------------------------------|-----------------------------------------------------------------------------------------------------------------------------------------------------------------------------------------------------------------------------------------------------------------------------------------------------|------------------------------------------------------------------------------------------------------------------------------------------------------------------------------------------------------------------------------------------------------------------------------|---------------------------------------------------------------------------------------------------------------------------------------------------------------------------------------------------------------------------------------------------------------------------------------------------------------------|---------------------------------------------------------------------------------------------------------------------------------------------------------------------------------------------------------------|----------------------------------------------------------------------------------------------------------------------------------------------------------------------------------------------------------|
|                         |                                    | Exclusion: lack of parental consent, major congenital or chromosomal anomalies, participating in another trial of fatty acid supplementation or receiving intravenous lipids containing fish oil or receiving breastmilk from a mother taking DHA supplements at a dose of more than 250 mg per day | alpha-linolenic acid, 4.8 mg vitamin C and 0.01 mg vitamin E<br><br>emulsion was enterally administered at dose of 0.17 ml/kg/body weight three times daily (total 0.5 ml/kg bodyweight/day) immediately before feeding via a nasogastric or orgastric tube (N=613 neonates) | 0.5 mL of the DHA emulsion contained 60 mg of DHA, 4 mg of EPA, 4.6 mg vitamin C, 0.05 mg vitamin E<br><br>emulsion was enterally administered at dose of 0.17 ml/kg/body weight three times daily (total 0.5 ml/kg bodyweight/day) immediately before feeding via a nasogastric or orgastric tube (N=592 neonates) | required sample size 1244 (622 per group)                                                                                                                                                                     | hemorrhage, sepsis, NEC and measures of safety and tolerance                                                                                                                                             |
| El-Ganzoury et al. 2014 | single center RCT<br>N=90 neonates | Inclusion: gestational age $\leq$ 33 weeks at the NICU of Ain-Shams University hospitals between March 2013 and March 2014.<br><br>Exclusion: lack of parental consent, congenital or acquired anomalies of the gastrointestinal tract and previous use of cytokines or intravenous immunoglobulin. | 1 mL of distilled water once daily (N=30 neonates)                                                                                                                                                                                                                           | recombinant EPO, single enteral daily dose of 80 IU/kg (N=20 neonates)<br><br>recombinant G-CSF, single enteral daily dose of 4.5 $\mu$ g/kg (N=20 neonates)<br><br>recombinant EPO, single enteral daily dose of 80 IU/kg, and recombinant G-CSF, single enteral                                                   | Yes, power calculation based on mean total time to full enteral feeding of 35 +/- 5 days, , estimated 30% relative difference time to full enteral feeding, power 80%; $\alpha$ 0.05; required sample size 20 | Primary outcome(s): time to full enteral feeding<br><br>Secondary outcome(s): weight gain, NEC incidence, NEC related death, length of hospital stay, hospital readmission, adverse effects of treatment |

|                         |                                        |                                                                                                                                                                                                                                                                                                                                                                                                           |                                                                     |                                                                                                                                                                                                                                                                                                                                                     |              |                                                                                                                                                                                                                                                                                    |
|-------------------------|----------------------------------------|-----------------------------------------------------------------------------------------------------------------------------------------------------------------------------------------------------------------------------------------------------------------------------------------------------------------------------------------------------------------------------------------------------------|---------------------------------------------------------------------|-----------------------------------------------------------------------------------------------------------------------------------------------------------------------------------------------------------------------------------------------------------------------------------------------------------------------------------------------------|--------------|------------------------------------------------------------------------------------------------------------------------------------------------------------------------------------------------------------------------------------------------------------------------------------|
|                         |                                        |                                                                                                                                                                                                                                                                                                                                                                                                           |                                                                     | daily dose of 4.5 µg/kg<br>(N=20 neonates)                                                                                                                                                                                                                                                                                                          |              |                                                                                                                                                                                                                                                                                    |
|                         |                                        |                                                                                                                                                                                                                                                                                                                                                                                                           |                                                                     | all interventions started<br>on the day of start of<br>enteral feeding and<br>continued until enteral<br>intake reached 100<br>ml/kg/day or after a<br>maximum of 7 days                                                                                                                                                                            |              |                                                                                                                                                                                                                                                                                    |
| Hosseini et al.<br>2019 | single center<br>RCT<br>N=150 neonates | Inclusion: gestational<br>age ≤ 28 weeks, birth<br>weight <1250,<br>appropriate for<br>gestational age between<br>June 21st 2016 and<br>February 19th 2018.<br><br>Exclusion: lack of<br>parental consent, severe<br>birth asphyxia,<br>chromosome anomalies,<br>congenital heart disease,<br>congenital intestinal<br>obstruction,<br>omphalocele,<br>gastroschisis, nil per os<br>for more than 3 weeks | routine feeding<br>without any<br>administration<br>(N=50 neonates) | synthetic amniotic fluid<br>(containing sodium<br>chloride, sodium<br>acetate, potassium<br>chloride and G-CSF), 5<br>ml/kg/day<br>(N=50 neonates)<br><br>recombinant human<br>EPO dissolved in<br>synthetic amniotic fluid<br>(containing sodium<br>chloride, sodium<br>acetate, potassium<br>chloride and G-CSF)<br>4400 mµ/ml<br>(N=50 neonates) | not provided | Primary/secondary<br>outcome(s):<br>gastric residual<br>volume, vomiting,<br>NEC (stage ≥2), NEC<br>requiring surgery,<br>retinopathy of<br>prematurity (stage 2 or<br>3), intraventricular<br>hemorrhage (grade<br>≥2), anemia of<br>prematurity, late onset<br>sepsis, mortality |
|                         |                                        |                                                                                                                                                                                                                                                                                                                                                                                                           |                                                                     | all interventions started<br>3 days after birth and<br>were continued for 21<br>days                                                                                                                                                                                                                                                                |              |                                                                                                                                                                                                                                                                                    |

|                        |                                       |                                                                                                                                                                                                                                                        |                                                                                                                                      |                                                                                                                                                                                                                                                                                    |                                                                                                                                                                                                                                                                      |                                                                                                                                                                                                                                                                                                                                                                                                |
|------------------------|---------------------------------------|--------------------------------------------------------------------------------------------------------------------------------------------------------------------------------------------------------------------------------------------------------|--------------------------------------------------------------------------------------------------------------------------------------|------------------------------------------------------------------------------------------------------------------------------------------------------------------------------------------------------------------------------------------------------------------------------------|----------------------------------------------------------------------------------------------------------------------------------------------------------------------------------------------------------------------------------------------------------------------|------------------------------------------------------------------------------------------------------------------------------------------------------------------------------------------------------------------------------------------------------------------------------------------------------------------------------------------------------------------------------------------------|
| Indrio et al.<br>2009  | single center<br>RCT<br>N=49 neonates | <p>Inclusion: healthy preterm neonates, appropriate for gestational age and normal Apgar score</p> <p>Exclusion: lack of parental consent, respiratory distress, congenital malformation, inborn errors of metabolism, proven sepsis or infection</p>  | <p>indistinguishable placebo formulation for 30 days<br/>(N=12 neonates)</p> <p>breastmilk fed control group<br/>(N=17 neonates)</p> | <p>prebiotic supplemented formula (0.8 g/dL of a mixture from SC-GOS and LC-FOS 9:1) for 30 days<br/>(N=10 neonates)</p> <p>probiotic supplemented formula (Lactobacillus reuteri, 10<sup>8</sup> CFU per day delivered in an oil formulation) for 30 days<br/>(N=10 neonates)</p> | not provided                                                                                                                                                                                                                                                         | <p>Primary/secondary outcome(s): gastric electrical activity (propagation), gastric emptying, weight gain, adverse events</p>                                                                                                                                                                                                                                                                  |
| Manzoni et al.<br>2013 | multi center<br>RCT<br>N=229 neonates | <p>Inclusion: gestational age &lt;32 weeks + 6 days, born within the study period</p> <p>Exclusion: lack of parental consent, admission &gt;48 hours of life, death &lt;72 hours of life and ophthalmic disease present at moment of randomization</p> | <p>oral placebo supplementation, 0.5 mL glucose 5%<br/>(N=116 neonates)</p>                                                          | <p>oral carotenoids supplementation, 0.5 ml containing 0.14 mg lutein and 0.0006 mg of zeaxanthin, single daily oral dose starting from the first 48 hours of life until week 36 of corrected gestational age<br/>(N=113 neonates)</p>                                             | <p>Yes, power calculation based on pretrial retinopathy of prematurity incidence of 18%, estimated 66% relative difference in retinopathy of prematurity incidence by carotenoids supplementation, power 80%; <math>\alpha</math> 0.05; required sample size 114</p> | <p>Primary outcome(s): incidence threshold retinopathy of prematurity, incidence bronchopulmonary dysplasia, incidence NEC and incidence NEC stage <math>\geq 2</math></p> <p>Secondary outcome(s): incidence retinopathy of prematurity (all stage), intestinal perforation, late-onset sepsis, mortality prior to discharge, severe (grade 3 or 4) intraventricular hemorrhage, need for</p> |



|                      |                                    |                                                                                                                                                                                      |                                                                                                                                                                                      |                                                                                                                                                                                                                                                                                                                                                                                                                                                               |                                                                                                                                                                                                                                                                                                                                                                                          | transfusion, liver failure                                                                                                       |
|----------------------|------------------------------------|--------------------------------------------------------------------------------------------------------------------------------------------------------------------------------------|--------------------------------------------------------------------------------------------------------------------------------------------------------------------------------------|---------------------------------------------------------------------------------------------------------------------------------------------------------------------------------------------------------------------------------------------------------------------------------------------------------------------------------------------------------------------------------------------------------------------------------------------------------------|------------------------------------------------------------------------------------------------------------------------------------------------------------------------------------------------------------------------------------------------------------------------------------------------------------------------------------------------------------------------------------------|----------------------------------------------------------------------------------------------------------------------------------|
| Manzoni et al. 2014  | multi center RCT<br>N=472          | Inclusion: VLBW neonates younger than 3 days at tertiary care units in Italy and New Zealand<br><br>Exclusion: lack of parental consent, ongoing antifungal prophylaxis, early onset | placebo (2 mL of a 5% glucose solution from day 3 once daily dissolved in milk for 6 (birth weight <1000 g) or 4 (birth weight 1001-1500g) weeks or until discharge (N=168 neonates) | bovine lactoferrin, 100 mg/day dissolved in milk, orally once daily from day 3 for 6 (birth weight <1000 g) or 4 (birth weight 1001-1500g) weeks or until discharge (N=153 neonates)<br><br>bovine lactoferrin, 100 mg/day dissolved in milk, + Lactobacillus rhamnosus GG, 6*10 <sup>9</sup> CFU / day dissolved in milk, orally once daily from day 3 for 6 (birth weight <1000 g) or 4 (birth weight 1001-1500g) weeks or until discharge (N=151 neonates) | Yes, power calculation based on pretrial NEC incidence of 7%, estimated 66% relative difference in NEC incidence by supplementation, power 80%; $\alpha$ 0.05; required sample size 238<br><br>NB: due to lower incidence rate of NEC (5.4% instead of 7%) power fell to 54% for the bovine lactoferrin supplementation group and 97% for lactoferrin + Lactobacillus rhamnosus GG group | Primary outcome(s): NEC stage $\geq 2$ and NEC or death<br><br>Secondary outcome(s): overall mortality (not attributable to NEC) |
| Mihatsch et al. 2006 | single center RCT<br>N=20 neonates | Inclusion: healthy, stable, preterm infants with birthweight <1500 gram and full enteral feeding with preterm                                                                        | standard preterm formula supplemented with placebo (1 g/dL, made from sachets                                                                                                        | standard preterm formula supplemented with GOS FOS (1g/dL, GOS FOS 1:1, made from sachets with 0.9g                                                                                                                                                                                                                                                                                                                                                           | no power calculation performed (pilot study)                                                                                                                                                                                                                                                                                                                                             | Primary outcome(s): stool viscosity, gastrointestinal transit time                                                               |

|                  |                                                                            |                                                                                                                                                                                                                                                                                                                       |                                                                                 |                                                                                                                                                                                                                                                                        |                                                                                                                         |                                                                                                                                                                                                                                                                                                                   |
|------------------|----------------------------------------------------------------------------|-----------------------------------------------------------------------------------------------------------------------------------------------------------------------------------------------------------------------------------------------------------------------------------------------------------------------|---------------------------------------------------------------------------------|------------------------------------------------------------------------------------------------------------------------------------------------------------------------------------------------------------------------------------------------------------------------|-------------------------------------------------------------------------------------------------------------------------|-------------------------------------------------------------------------------------------------------------------------------------------------------------------------------------------------------------------------------------------------------------------------------------------------------------------|
|                  |                                                                            | infant formula because breastmilk was unavailable                                                                                                                                                                                                                                                                     | with 1.8g maltodextrin) (N=10 neonates)                                         | GOS FOS and 0.9g maltodextrin) (N=10 neonates)                                                                                                                                                                                                                         |                                                                                                                         | Secondary outcome(s): stool frequency and quality, stool pH, feeding volume, weight gain                                                                                                                                                                                                                          |
|                  |                                                                            | Exclusion: lack of parental consent, anomalies that may interfere with feeding tolerance (cardiac defects, pulmonary diseases such as bronchopulmonary dysplasia, gastrointestinal diseases or chromosomal abnormalities)                                                                                             |                                                                                 |                                                                                                                                                                                                                                                                        |                                                                                                                         |                                                                                                                                                                                                                                                                                                                   |
| Omar et al. 2020 | single center, double-blind placebo controlled pilot study, N=120 neonates | Inclusion gestational age ≤ 32 weeks at the NICU of a tertiary care hospital<br><br>Exclusion: lack of parental consent, receiving chest compression or any medication during resuscitation, genetic syndromes or inborn errors of metabolism, major congenital defects, previous administration of parenteral growth | single daily dose of distilled water mixed with preterm formula (N=60 neonates) | enteral recombinant EPO, 0.88 IU/kg/day at concentration of 100 IU/mL in distilled water mixed with preterm formula, single enteral daily dose, starting at the day of enteral feeding until enteral intake of 150/ml/kg or after a maximum of 10 days (N=60 neonates) | Yes, a sample size of 30 patients per group was deemed sufficient for a pilot study with power of 80% and $\alpha$ 0.05 | Primary outcome(s): feeding tolerance (including day of successful start of enteral feeding).<br><br>Secondary outcome(s): time to establish one-half, two-thirds and full enteral feedings, number of episodes of feeding intolerance, time to regain birth weight, incidence of NEC (stage ≥2), adverse effects |

|                                                                            |                                        | factors or previous<br>treatment with<br>intravenous<br>immunoglobulins                                                                                                                                                                                                                                                                                                                                                                                                                                                                                      |                                                                                                         |                                                                                                                                                                                                                                                                                                                                                                                                                 |                                                                                                                               |                                                                                       |
|----------------------------------------------------------------------------|----------------------------------------|--------------------------------------------------------------------------------------------------------------------------------------------------------------------------------------------------------------------------------------------------------------------------------------------------------------------------------------------------------------------------------------------------------------------------------------------------------------------------------------------------------------------------------------------------------------|---------------------------------------------------------------------------------------------------------|-----------------------------------------------------------------------------------------------------------------------------------------------------------------------------------------------------------------------------------------------------------------------------------------------------------------------------------------------------------------------------------------------------------------|-------------------------------------------------------------------------------------------------------------------------------|---------------------------------------------------------------------------------------|
| Serce<br>Pehlevan et<br>al.<br>doi:<br>10.5546/aap.2<br>020.eng.e8<br>2020 | single center<br>RCT<br>N=50 neonates  | Inclusion: gestational<br>age ≤32 weeks, admitted<br>to the neonatology unit<br>of the Zeynep Kamil<br>Maternity and<br>Children's Training and<br>Research<br>Hospital, Istanbul,<br>Turkey, between July<br>and September 2013<br><br>Exclusion: congenital<br>anomalies, born to<br>mothers with premature<br>rupture of membranes<br>or chorioamnionitis<br><br>Excluded after<br>randomization:<br>mechanical ventilation<br>for >7 days, culture<br>proven sepsis at time of<br>blood sampling, NEC,<br>surgery, infants that<br>died <30 days of life | placebo (distilled<br>water 1 mL per<br>dose, every 12<br>hours), added to<br>breast milk or<br>formula | mixture containing per<br>sachet 8.2*10 <sup>8</sup><br><i>Lactobacillus rhamnosus</i><br>KCTC 12202BP, 4.1 *10 <sup>8</sup><br><i>Lactobacillus plantarum</i><br>KCTC 10782BP,<br><i>Lactobacillus casei</i> KCTC<br>12398BP, <i>Bifidobacterium</i><br><i>lactis</i> KCTC 11904BP,<br>383 mg FOS, 100 mg<br>GOS and 2 mg bovine<br>lactoferrin, ½ sachet<br>every 12 hours added to<br>breast milk or formula | Yes, with an<br>estimated effect<br>size of 0.75 SD, a<br>power of 80% and<br>α 0.05, 24 patients<br>were needed per<br>group | Primary/secondary<br>outcome(s):<br>serum cytokine levels<br>(IL5, IL10, IL17a, IFNγ) |
| Serce<br>Pehlevan et<br>al.<br>doi:                                        | single center<br>RCT<br>N=208 neonates | Inclusion: gestational<br>age ≤32 weeks, birth<br>weight ≤1500 g,<br>admitted to the                                                                                                                                                                                                                                                                                                                                                                                                                                                                         | placebo (distilled<br>water 1 mL per<br>dose, every 12<br>hours), added to                              | mixture containing per<br>sachet 8.2*10 <sup>8</sup><br><i>Lactobacillus rhamnosus</i><br>KCTC 12202BP, 4.1 *10 <sup>8</sup>                                                                                                                                                                                                                                                                                    | Yes, power<br>calculation based<br>on pretrial NEC or<br>late onset sepsis                                                    | Primary outcome(s):<br>NEC stage ≥2 or<br>culture proven late<br>onset sepsis,        |

|                                    |                                        |                                                                                                                                                                                                                                                                                                                                       |                                                                                                    |                                                                                                                                                                                                                                                           |                                                                                                                                                                                                                                                                            |                                                                                                                                                                                                             |
|------------------------------------|----------------------------------------|---------------------------------------------------------------------------------------------------------------------------------------------------------------------------------------------------------------------------------------------------------------------------------------------------------------------------------------|----------------------------------------------------------------------------------------------------|-----------------------------------------------------------------------------------------------------------------------------------------------------------------------------------------------------------------------------------------------------------|----------------------------------------------------------------------------------------------------------------------------------------------------------------------------------------------------------------------------------------------------------------------------|-------------------------------------------------------------------------------------------------------------------------------------------------------------------------------------------------------------|
| 10.3345/cep.2<br>019.00381<br>2020 |                                        | neonatology unit of the Zeynep Kamil Maternity and Children's Training and Research Hospital, Istanbul, Turkey, between February 2012 and September 2013, survived to start of enteral feeding<br><br>Exclusion: severe asphyxia (stage III), major congenital anomalies, fasted $\geq 3$ weeks, death within first 14 postnatal days | breast milk or formula                                                                             | <i>Lactobacillus plantarum</i> KCTC 10782BP, <i>Lactobacillus casei</i> KCTC 12398BP, <i>Bifidobacterium lactis</i> KCTC 11904BP, 383 mg FOS, 100 mg GOS and 2 mg bovine lactoferrin, $\frac{1}{2}$ sachet every 12 hours added to breast milk or formula | incidence of 31% and death or NEC incidence of 35%, estimated 50% difference in NEC/late onset sepsis or NEC/death incidence by supplementation, power 80%; $\alpha$ 0.05; required sample size of 104 for NEC or late onset sepsis and sample size of 92 for NEC or death | NEC stage $\geq 2$ or death<br><br>Secondary outcome(s): time to reach 100 ml/kg/day of enteral feeding, oxygen dependency at 36 weeks, mortality before hospital discharge and duration of hospitalization |
| Sevastiadou<br>et al.<br>2011      | single center<br>RCT<br>N=101 neonates | Inclusion: formula fed, prematurely born infants admitted to the NICU of 'Alexandra' Regional General Hospital, Athens, Greece, between January 2007 and December 2008 with a GA $< 34$ weeks and birth weight $< 2000$ g<br><br>Exclusion: lack of parental consent, major congenital or chromosomal                                 | isocaloric glucose-polymer powder with same color and smell as intervention powder (N=50 neonates) | enteral L-glutamin powder supplementation separate from formula, 3 times a day between 3 and 30 days of life, 0.3 g/kg/day diluted in water as a 10% solution (N=51 neonates)                                                                             | not provided                                                                                                                                                                                                                                                               | Primary/secondary outcome(s): intestinal permeability, NEC incidence, sepsis                                                                                                                                |

|                         |                                       |                                                                                                                                                                                                                                  |                                                                                               |                                                                                                                                                 |                                                                                                                                                                                                                        |                                                                                                                                                                                                      |
|-------------------------|---------------------------------------|----------------------------------------------------------------------------------------------------------------------------------------------------------------------------------------------------------------------------------|-----------------------------------------------------------------------------------------------|-------------------------------------------------------------------------------------------------------------------------------------------------|------------------------------------------------------------------------------------------------------------------------------------------------------------------------------------------------------------------------|------------------------------------------------------------------------------------------------------------------------------------------------------------------------------------------------------|
|                         |                                       | anomalies, severe hypotension, severe perinatal distress (pH <7 or hypoxia with bradycardia > 2h), abdominal distention, signs of early NEC, receiving breast milk                                                               |                                                                                               |                                                                                                                                                 |                                                                                                                                                                                                                        |                                                                                                                                                                                                      |
| Stratiki et al.<br>2007 | RCT<br>N=75 neonates                  | Inclusion: gestational age between 27 and 37 gestational age, stable state, formula fed and not suffering from major deformities (congenital heart defects, bowel atresia)                                                       | formula without supplemented <i>Bifidobacterium lactis</i>                                    | <i>Bifidobacterium lactis</i> in formula feeding, 2*10 <sup>7</sup> CFU/g milk powder, administered according to neonatal unit feeding protocol | Yes, based on data on lactulose / mannitol ratio from an earlier study, a sample size of 30 infants was considered adequate to detect a significant difference of lactulose / mannitol ratio following supplementation | Primary outcome(s): intestinal permeability<br><br>Secondary outcome(s): somatic growth, tolerance, rates of sepsis and NEC                                                                          |
| Sun et al.<br>2020      | multi center<br>RCT<br>N=262 neonates | Inclusion: gestational age <28 weeks and <96 hours of age<br><br>Exclusion: lack of parental consent, genetic metabolic disease, congenital major abnormalities, congenital TORCH infections with overt signs at birth, terminal | placebo solution with soybean oil with the same aspect as vitamin A solution (N=130 neonates) | Vitamin A, 1500 IU/day, solution was added to enteral feeds when minimal enteral feeding started until 28 days or discharge (N=132 neonates)    | Yes, power calculation based on estimated 30% relative difference in retinopathy of prematurity incidence by supplementation, power 80%; $\alpha$ 0.05; required sample size 254                                       | Primary outcome(s): composite of mortality or type 1 retinopathy of prematurity, bronchopulmonary dysplasia, serum vitamin A levels, signs of vitamin A toxicity, vomiting and intracranial pressure |

|                    |                                     |                                                                                                                                                                         |                                                                                                                                                                                              |                                                                                                                                               |                                                                                                                                                                                                                                                                                    |                                                                                                                                                                                                                                                                                                                                                                                                       |
|--------------------|-------------------------------------|-------------------------------------------------------------------------------------------------------------------------------------------------------------------------|----------------------------------------------------------------------------------------------------------------------------------------------------------------------------------------------|-----------------------------------------------------------------------------------------------------------------------------------------------|------------------------------------------------------------------------------------------------------------------------------------------------------------------------------------------------------------------------------------------------------------------------------------|-------------------------------------------------------------------------------------------------------------------------------------------------------------------------------------------------------------------------------------------------------------------------------------------------------------------------------------------------------------------------------------------------------|
|                    |                                     | stage illness (pH <7.0 or hypoxia with bradycardia >2 hours)                                                                                                            |                                                                                                                                                                                              |                                                                                                                                               |                                                                                                                                                                                                                                                                                    | Secondary outcome(s): mortality, retinopathy of prematurity, sepsis, NEC stage ≥2, severe intraventricular hemorrhage (grade ≥3), periventricular leukomalacia                                                                                                                                                                                                                                        |
| Wardle et al. 2001 | single center RCT<br>N=154 neonates | Inclusion: <1000g birth weight and parental consent within the first 24 hours<br><br>Exclusion: lack of parental consent, major life threatening congenital abnormality | daily dose of equal volume of an inert placebo solution (looking identical as the intervention) orally as a bolus through orogastric tube from postnatal day 1 until day 28 (N= 77 neonates) | vitamin A, daily dose of 5000 IU/kg (3000 µg/kg) orally as a bolus through orogastric tube from postnatal day 1 until day 28 (N= 77 neonates) | Yes, power calculation based on prior incidence of chronic lung disease death of 90% and of chronic lung disease in survivors of 83%, estimated risk reduction to 70% (chronic lung disease and death) and 50% (chronic lung disease), power 80%; α 0.05; required sample size 158 | Primary outcome(s): requirement for supplementary oxygen at 28 days<br><br>Secondary outcome(s): death before discharge, supplementary oxygen requirement at 36 weeks, retinopathy of prematurity requiring treatment, intraventricular hemorrhage with parenchymal involvement, patent ductus arteriosus requiring treatment, NEC requiring surgery and number of episodes of sepsis, adverse events |

|                              |                                        |                                                                                                                                                                                                                                                                                                                      |                                                                                                                                                                                                                 |                                                                                                                                                                                                               |                                                                                                                                                                |                                                                      |
|------------------------------|----------------------------------------|----------------------------------------------------------------------------------------------------------------------------------------------------------------------------------------------------------------------------------------------------------------------------------------------------------------------|-----------------------------------------------------------------------------------------------------------------------------------------------------------------------------------------------------------------|---------------------------------------------------------------------------------------------------------------------------------------------------------------------------------------------------------------|----------------------------------------------------------------------------------------------------------------------------------------------------------------|----------------------------------------------------------------------|
| Westerbeek<br>et al.<br>2011 | single center<br>RCT<br>N=113 neonates | Inclusion: preterm<br>infants <32 weeks GA<br>and/or birthweight<br><1500 g admitted to the<br>NICU of the VU<br>University Medical<br>Center, Amsterdam.<br><br>Exclusion: >34 weeks<br>GA, major congenital or<br>chromosomal<br>anomalies, imminent<br>death, transfer to<br>another hospital <48h<br>after birth | placebo powder<br>(maltodextrin) in<br>increasing doses<br>between d3 and<br>d30 to a maximum<br>of 1.5 g/kg added to<br>breastmilk or<br>preterm formula<br>(without<br>oligosaccharides)<br>(N= 58 neonates ) | 72% SC-GOS, 8% LC-<br>FOS, 20% AOS in<br>increasing doses<br>between d3 and d30 to a<br>maximum of 1.5 g/kg<br>added to breastmilk or<br>preterm formula<br>(without<br>oligosaccharides)<br>(N= 55 neonates) | Yes, the sample size<br>of 113 was based on<br>sample size<br>calculation for the<br>primary outcome of<br>the main trial<br>(serious infectious<br>morbidity) | Primary/secondary<br>outcome(s):<br>fecal calprotectin, fecal<br>IL8 |
|------------------------------|----------------------------------------|----------------------------------------------------------------------------------------------------------------------------------------------------------------------------------------------------------------------------------------------------------------------------------------------------------------------|-----------------------------------------------------------------------------------------------------------------------------------------------------------------------------------------------------------------|---------------------------------------------------------------------------------------------------------------------------------------------------------------------------------------------------------------|----------------------------------------------------------------------------------------------------------------------------------------------------------------|----------------------------------------------------------------------|

RCT, randomized controlled trial; GA, gestational age; NEC, necrotizing enterocolitis; SC-GOS, short-chain galacto-oligosaccharides; LC-FOS, long-chain fructo-oligosaccharides; DHA, docosahexaenoic acid; EPA: eicosapentaenoic acid; EPO, erythropoietin; G-CSF, granulocyte colony-stimulating factor; AOS, acidic oligosaccharides

**Supplementary table S7.** Overview included systematic reviews and meta-analysis on enteral feeding interventions for prevention of NEC in human infants

| Author and year           | Type of study and sample size                                                                                      | Study selection criteria                                                                                                                                                                                                                                                               | Control                                                             | Intervention                                        | Primary / secondary outcome measures                                                                                                                                                                    | Evidence level and risk of bias according to authors meta-analysis                                                                                             |
|---------------------------|--------------------------------------------------------------------------------------------------------------------|----------------------------------------------------------------------------------------------------------------------------------------------------------------------------------------------------------------------------------------------------------------------------------------|---------------------------------------------------------------------|-----------------------------------------------------|---------------------------------------------------------------------------------------------------------------------------------------------------------------------------------------------------------|----------------------------------------------------------------------------------------------------------------------------------------------------------------|
| Van den Akker et al. 2018 | systematic review and network meta-analysis<br><br>N for NEC outcome = 43 studies and 10.651 neonates              | RCTs reporting on only preterm infants or subgroup with preterm infants (<37 weeks GA), comparing probiotic treatment with placebo or no treatment or comparing different probiotic interventions, both single- or multiple strains included, available in English and fully published | placebo, usual care or head-to-head with different probiotic regime | probiotics single- or multiple-strain               | Primary outcomes: well-described outcome reports of NEC, blood-culture proven late onset sepsis, postnatal age at reaching full enteral feeding, in-hospital mortality<br><br>Secondary outcome: -      | studies in general underpowered for NEC incidence as outcome measure, most strains only studied in a few trials, limited evidence for the most preterm infants |
| Ananthan et al. 2018      | systematic review and meta-analysis<br><br>N for NEC outcome (enteral administration) = 2 studies and 110 neonates | RCTs comparing recombinant EPO with placebo or standard treatment without recombinant EPO supplementation                                                                                                                                                                              | placebo or standard treatment without EPO                           | recombinant EPO                                     | Primary outcomes: incidence of NEC stage $\geq 2$ , any stage NEC<br><br>Secondary outcomes: feeding intolerance, time to reach full feedings, late onset sepsis, bronchopulmonary dysplasia, mortality | the included trials for enteral administration were at risk for selection bias, reporting bias and other bias                                                  |
| Chi et al. 2019           | systematic review and meta-analysis                                                                                | RCTs comparing prebiotics (SC-GOS, LC-FOS, pAOS, oligosaccharides,                                                                                                                                                                                                                     | placebo                                                             | prebiotics (SC-GOS, LC-FOS, pAOS, oligosaccharides, | Primary outcomes: incidence of sepsis, NEC and mortality<br><br>Secondary outcomes: length of                                                                                                           | 5 out of 6 included studies were judged to be of high quality, 1                                                                                               |



|                       | N for NEC outcome = 6 studies and 737 neonates                                             | fructans, inulin or oligofructose) in low birth weight (<2500 g) or preterm(<37 weeks GA) infants with placebo, published in peer-reviewed journals from January 2020 until June 2018 |                         | fructans, inulin or oligofructose)                                                                  | hospital stay, feeding intolerance, stool frequency                                                                                                                                                                                                                                                                                                                                                                    | study was of moderate quality                                                                                                             |
|-----------------------|--------------------------------------------------------------------------------------------|---------------------------------------------------------------------------------------------------------------------------------------------------------------------------------------|-------------------------|-----------------------------------------------------------------------------------------------------|------------------------------------------------------------------------------------------------------------------------------------------------------------------------------------------------------------------------------------------------------------------------------------------------------------------------------------------------------------------------------------------------------------------------|-------------------------------------------------------------------------------------------------------------------------------------------|
| Foster et al. 2016    | systematic review and meta-analysis<br><br>N for NEC outcome = 3 studies and 2095 neonates | RCTs and quasi-randomized controlled trials studying the use of oral immunoglobulins as prophylaxis against NEC in preterm (<37 weeks GA) and/or low birth weight (<2500 g) neonates  | placebo or no treatment | oral immunoglobulins                                                                                | Primary outcome: diagnosis of definite NEC during study period<br><br>Secondary outcomes: suspected NEC during study period, surgery for NEC during study period, NEC related death, length of hospital stay, hospital readmission within the first year of life, days receiving total parenteral nutrition, growth and development in childhood, parental emotional and financial costs, adverse effects of treatment | low to very low quality of evidence; incomplete outcome data, high rate of non-compliance, unclear allocation concealment and imprecision |
| Moe-Byrne et al. 2016 | systematic review and meta-analysis<br><br>N for NEC outcome = 7 studies and 1172 neonates | RCTs and quasi-randomized controlled trials of glutamine supplementation in preterm neonates at any time from birth to discharge from hospital                                        | no supplementation      | enteral (or parenteral) glutamine supplementation from any time from birth until hospital discharge | Primary outcomes: death prior to hospital discharge, neurodevelopment<br><br>Secondary outcomes: invasive infection during hospital admission, NEC during hospital admission                                                                                                                                                                                                                                           | moderate quality of evidence; unexplained heterogeneity and funnel plot asymmetry                                                         |

|                       |                                                                                                      |                                                                                                                                                                                                |                                                        |                                                         |                                                                                                                                                                                                                                                                                                                                                                                                                                                                                                                          |                                                                                                                                                                                                                          |
|-----------------------|------------------------------------------------------------------------------------------------------|------------------------------------------------------------------------------------------------------------------------------------------------------------------------------------------------|--------------------------------------------------------|---------------------------------------------------------|--------------------------------------------------------------------------------------------------------------------------------------------------------------------------------------------------------------------------------------------------------------------------------------------------------------------------------------------------------------------------------------------------------------------------------------------------------------------------------------------------------------------------|--------------------------------------------------------------------------------------------------------------------------------------------------------------------------------------------------------------------------|
| Morgan et al.<br>2020 | systematic review and network meta-analysis<br><br>N for NEC outcome = 56 studies and 12738 neonates | RCTs with single- or multiple-strain probiotic (living bacteria) interventions for prevention of mortality or morbidity in preterm (<37 weeks GA) and/or low birth weight (<2500 gram) infants | placebo, formula, parenteral nutrition or no treatment | probiotics (living bacteria) single- or multiple-strain | Primary outcomes: all-cause mortality, severe NEC (stage $\geq 2$ ), culture proven sepsis, hospitalization, time to reach full enteral feeds<br><br>Secondary outcome: -                                                                                                                                                                                                                                                                                                                                                | low to high certainty of evidence; data with low and moderate to high certainty of evidence are presented separately                                                                                                     |
| Pammi et al.<br>2020  | systematic review and meta-analysis<br><br>N for NEC outcome = 7 studies and 4874 neonates           | RCTs evaluating the effect of enteral lactoferrin administration at any dose or duration to prevent NEC (and sepsis) in preterm neonates                                                       | placebo or no intervention                             | enteral lactoferrin at any dose or duration             | Primary outcomes: confirmed or suspected sepsis during hospital stay, NEC stage $\geq 2$ , all-cause mortality during hospital stay<br><br>Secondary outcomes: neurological outcome at two years of age or alter, chronic lung disease in survivors, adverse outcomes, periventricular leukomalacia, duration of assisted ventilation through an endotracheal tube, length of hospital stay, posthoc analyses of bacterial infection, fungal infection, threshold retinopathy of prematurity and urinary tract infection | low certainty of evidence for NEC outcome; confidence in the effect estimate is limited, true effect may be substantially different from the estimate of the effect, risk of bias in the included trials and imprecision |
| Shah et al.<br>2017   | systematic review and meta-analysis                                                                  | RCTs and quasi-randomized controlled trials of arginine                                                                                                                                        | placebo or no treatment                                | enteral or parenteral arginine                          | Primary outcome: NEC any stage and specific stages                                                                                                                                                                                                                                                                                                                                                                                                                                                                       | moderate certainty of evidence; future research likely will                                                                                                                                                              |

|                   |                                                                                           |                                                                                                                                                                                           |                                                                                             |                                                                                                                                        |                                                                                                                                                                                                                                                                                                                                                                          |                                                                                               |
|-------------------|-------------------------------------------------------------------------------------------|-------------------------------------------------------------------------------------------------------------------------------------------------------------------------------------------|---------------------------------------------------------------------------------------------|----------------------------------------------------------------------------------------------------------------------------------------|--------------------------------------------------------------------------------------------------------------------------------------------------------------------------------------------------------------------------------------------------------------------------------------------------------------------------------------------------------------------------|-----------------------------------------------------------------------------------------------|
|                   | N for NEC outcome = 3 studies and 285 neonates                                            | supplementation, administered orally or parenterally for at least seven days, in addition to intake with regular enteral/parenteral feeding                                               |                                                                                             | supplementation for at least 7 days                                                                                                    | Secondary outcomes: death before discharge, death attributed to NEC, surgery for NEC, duration of total parenteral nutrition administration, plasma concentrations of arginine and glutamine, side effects of arginine supplementation                                                                                                                                   | have an important impact on confidence in the estimate of effect and may change this estimate |
| Zhang et al. 2014 | systematic review and meta-analysis<br><br>N for NEC outcome = 5 studies and 900 neonates | observational studies or RCTs published until May 2013 that included infants <29 weeks GA that evaluated the relationship between n-3 long chain PUFA and major adverse neonatal outcomes | standard interventions, placebo or any other control levels of n-3 long chain PUFA exposure | any n-3 long chain PUFA exposure to the infant or any n-3 long chain PUFA supplementation directly to the infant or through the mother | Primary outcome: bronchopulmonary dysplasia free survival at 36 weeks postmenstrual age<br><br>Secondary outcomes: death, duration of ventilation or oxygen support, length of hospitalization, occurrence of intraventricular hemorrhage, periventricular leukomalacia, NEC, infections, retinopathy of prematurity or hemodynamic significant patent ductus arteriosus | no separate quality analysis reported for the included studies                                |

RCT, randomized controlled trial; GA, gestational age; NEC, necrotizing enterocolitis; EPO, erythropoietin; SC-GOS, short chain galacto-oligosaccharides; LC-FOS, long chain fructo-oligosaccharides; pAOS: pectin-derived acidic oligosaccharides; PUFA, polyunsaturated fatty acids

**Supplementary table S8.** Risk of bias assessment of the included experimental animal studies (SYRCLE's risk of bias tool)

[illegible]

**Supplementary table S9.** Risk of bias assessment of the included RCTs (Jadad scoring system)

|                                                        | Akin 2014 | Collins 2017 | El-Ganzoury 2014 | Hosseini 2018 | Indrio 2009 | Manzoni 2013 | Manzoni 2014 | Mihatsch 2006 | Omar 2020 | Serce Pehlevan 2020<br>doi: 10.5546/aap.2020.eng.e8 | Serce Pehlevan 2020<br>doi: 10.3345/cep.2019.00381 | Sevastiadou 2011 | Stratiki 2007 | Sun 2020 | Wardle 2001 | Westerbeek 2011 |
|--------------------------------------------------------|-----------|--------------|------------------|---------------|-------------|--------------|--------------|---------------|-----------|-----------------------------------------------------|----------------------------------------------------|------------------|---------------|----------|-------------|-----------------|
| 1) Was the study described as randomized               | 2         | 2            | 2                | 1             | 1           | 2            | 2            | 2             | 2         | 2                                                   | 2                                                  | 1                | 2             | 1        | 2           | 2               |
| 2) Was the study described as double-blind             | 2         | 2            | 2                | 0             | 2           | 2            | 2            | 2             | 2         | 2                                                   | 2                                                  | 2                | 2             | 2        | 2           | 2               |
| 3) Was there a description of withdrawels and dropouts | 1         | 1            | 1                | 1             | 0           | 1            | 1            | 1             | 1         | 1                                                   | 1                                                  | 1                | 1             | 1        | 0           | 1               |
| Total score                                            | 5         | 5            | 5                | 2             | 3           | 5            | 5            | 5             | 5         | 5                                                   | 5                                                  | 4                | 5             | 4        | 4           | 5               |

**Supplementary table S10.** Risk of bias assessment of the included meta-analyses (AMSTAR measurement tool)

|                                                                                                      | Akker, van den 2018 | Ananthan 2018 | Chi 2018     | Foster 2016 | Moe-Byrne 2016 | Morgan 2020  | Pammi 2020 | Shah 2017 | Zhang 2014   |
|------------------------------------------------------------------------------------------------------|---------------------|---------------|--------------|-------------|----------------|--------------|------------|-----------|--------------|
| 1) Was an 'a priori' design provided?                                                                | yes                 | can't answer  | yes          | yes         | yes            | yes          | yes        | yes       | yes          |
| 2) Was there duplicate study selection and data extraction?                                          | yes                 | yes           | yes          | yes         | yes            | yes          | yes        | yes       | yes          |
| 3) Was a comprehensive literature search performed?                                                  | no                  | yes           | yes          | yes         | yes            | yes          | yes        | yes       | yes          |
| 4) Was the status of publication (i.e. grey literature) used as an inclusion criterion?              | yes                 | yes           | can't answer | yes         | yes            | yes          | yes        | yes       | yes          |
| 5) Was a list of studies (included and excluded) provided?                                           | no                  | no            | no           | yes         | yes            | can't answer | yes        | no        | no           |
| 6) Where the characteristics of the included studies provided?                                       | yes                 | yes           | yes          | yes         | yes            | yes          | yes        | yes       | yes          |
| 7) Was the scientific quality of the included studies assessed and documented?                       | yes                 | yes           | yes          | yes         | yes            | yes          | yes        | yes       | yes          |
| 8) Was the scientific quality of the included studies used appropriately in formulating conclusions? | yes                 | yes           | can't answer | yes         | yes            | yes          | yes        | yes       | can't answer |
| 9) Where there methods used to combine the findings of studies appropriate?                          | yes                 | yes           | yes          | yes         | yes            | yes          | yes        | yes       | yes          |
| 10) Was the likelihood of publication bias assessed?                                                 | yes                 | yes           | yes          | yes         | yes            | yes          | yes        | yes       | yes          |
| 10) Was the conflict of interest stated?                                                             | no                  | no            | no           | no          | no             | yes          | no         | no        | no           |

Supplementary table S11. GRADE approach scoring of clinical studies

|                                                                                                                                                   | limitations in study design or execution (risk of bias) | inconsistency of results | indirectness of evidence | imprecision | Publication bias | Overall certainty of evidence (GRADE) |
|---------------------------------------------------------------------------------------------------------------------------------------------------|---------------------------------------------------------|--------------------------|--------------------------|-------------|------------------|---------------------------------------|
| n-3 PUFA (NEC incidence all neonates)                                                                                                             | -1                                                      | 0                        | 0                        | -1          | 0                | Low                                   |
| n-3 PUFA (NEC incidence neonates ≤32 weeks)                                                                                                       | -1                                                      | 0                        | 0                        | -1          | 0                | Low                                   |
| DHA (NEC incidence)                                                                                                                               | 0                                                       | 0                        | 0                        | -2          | 0                | Low                                   |
| prebiotics (NEC incidence)                                                                                                                        | 0                                                       | -1                       | 0                        | -1          | 0                | Low                                   |
| lactoferrin (incidence stage II or III NEC)                                                                                                       | -1                                                      | 0                        | 0                        | -1          | 0                | Low                                   |
| arginine (NEC incidence)                                                                                                                          | 0                                                       | 0                        | 0                        | -1          | 0                | Moderate                              |
| arginine (death due to NEC)                                                                                                                       | 0                                                       | 0                        | 0                        | -2          | 0                | Low                                   |
| glutamine (NEC incidence)                                                                                                                         | 0                                                       | 0                        | 0                        | -1          | -1               | Low                                   |
| immunoglobulins, (NEC incidence)                                                                                                                  | -2                                                      | 0                        | 0                        | 0           | 0                | Low                                   |
| immunoglobulins, (NEC surgery)                                                                                                                    | -2                                                      | 0                        | 0                        | -1          | 0                | Very low                              |
| immunoglobulins (death due to NEC)                                                                                                                | -2                                                      | 0                        | 0                        | -1          | 0                | Very low                              |
| EPO (incidence stage II or III NEC)                                                                                                               | 0                                                       | -1                       | 0                        | -2          | 0                | Very low                              |
| EPO (NEC incidence)                                                                                                                               | -1                                                      | -1                       | 0                        | -2          | 0                | Very low                              |
| EPO + G-CSF (NEC incidence)                                                                                                                       | 0                                                       | 0                        | 0                        | -2          | 0                | Low                                   |
| G-CSF (NEC incidence)                                                                                                                             | 0                                                       | 0                        | 0                        | -2          | 0                | Low                                   |
| G-CSF (in artificial amniotic fluid) (NEC incidence)                                                                                              | -1                                                      | 0                        | 0                        | -2          | 0                | Very low                              |
| vitamin A (NEC incidence)                                                                                                                         | -1                                                      | 0                        | 0                        | -1          | 0                | Low                                   |
| probiotics Lactobacillus spp. and Bifidobacterium spp. (incidence stage II or III NEC)                                                            | 0                                                       | 0                        | -1                       | 0           | 0                | Moderate                              |
| probiotics Bifidobacterium animalis subsp. Lactis (incidence stage II or III NEC)                                                                 | 0                                                       | 0                        | 0                        | -1          | 0                | Moderate                              |
| probiotics Lactobacillus reuteri (incidence stage II or III NEC)                                                                                  | 0                                                       | 0                        | -1                       | -1          | 0                | Low                                   |
| probiotics Lactobacillus rhamnosus (incidence stage II or III NEC)                                                                                | 0                                                       | 0                        | 0                        | -1          | 0                | Moderate                              |
| probiotics combination of Lactobacillus spp., Bifidobacterium spp. and Enterococcus spp. (incidence stage II or III NEC)                          | -2                                                      | 0                        | 0                        | 0           | 0                | Low                                   |
| probiotics combination of Bacillus spp. and Enterococcus spp. (incidence stage II or III NEC)                                                     | 0                                                       | 0                        | 0                        | -1          | 0                | Moderate                              |
| probiotics Bifidobacterium lactis Bb-12 or B-94 (NEC incidence)                                                                                   | 0                                                       | 0                        | 0                        | -1          | 0                | Moderate                              |
| probiotics Lactobacillus reuteri ATCC55730 or DSM17938 (NEC incidence)                                                                            | 0                                                       | 0                        | -1                       | -1          | 0                | Low                                   |
| probiotics Lactobacillus rhamnosus GG (NEC incidence)                                                                                             | 0                                                       | 0                        | -1                       | -1          | 0                | Low                                   |
| probiotics combination of Bifidobacterium bifidum, Bifidobacterium infantis, Bifidobacterium longum and Lactobacillus acidophilus (NEC incidence) | 0                                                       | 0                        | 0                        | -2          | 0                | Low                                   |
| probiotics combination of Bifidobacterium infantis Bb-02, Bifidobacterium lactis Bb-12 and Streptococcus thermophilus TH-4 (NEC incidence)        | 0                                                       | -1                       | 0                        | -1          | 0                | Low                                   |
| probiotics Bifidobacterium longum 35624 and Lactobacillus rhamnosus GG (NEC incidence)                                                            | 0                                                       | 0                        | 0                        | -2          | 0                | Low                                   |
| carotenoids (incidence stage II or III NEC)                                                                                                       | 0                                                       | 0                        | 0                        | -2          | 0                | Low                                   |
| mixture of probiotics, prebiotics and lactoferrin (NEC incidence)                                                                                 | 0                                                       | 0                        | 0                        | -2          | 0                | Low                                   |
| mixture of probiotics, prebiotics and lactoferrin (incidence stage II or III NEC)                                                                 | 0                                                       | 0                        | 0                        | -2          | 0                | Low                                   |
